1 **Evolutionary analysis of LP3 gene family in conifers: an ASR homolog**

2 Lecoy Jonathan<sup>1</sup> & García-Gil MR<sup>1</sup>

3 <sup>1</sup> Department of Forest Genetics and Plant Physiology, Umeå Plant Science Center, SLU,

4 Umeå, Sweden.

5 Corresponding author: Maria Rosario García-Gil, [m.rosario.garcia@slu.se](mailto:m.rosario.garcia@slu.se)

6

7

## 8 **Abstract**

9 Drought has long been established as a major environmental stress for plants which have in turn  
10 developed several coping strategies, ranging from physiological to molecular mechanisms.  
11 *LP3*; a homolog of the Abscisic Acid, Stress and Ripening (*ASR*) gene was first detected in  
12 tomato; and has been shown to be present in four different isoforms in loblolly pine called *LP3-*  
13 *0*, *LP3-1*, *LP3-2* and *LP3-3*. While *ASR* has already been extensively studied notably in tomato,  
14 the same cannot be said of *LP3*. Like *ASR*, the different *LP3* isoforms have been shown to be  
15 upregulated in response to water deficit stress and to also act as transcription factors for genes  
16 likely involved in hexose transport. In this study we have investigated the evolutionary history  
17 of *LP3* gene family, with the aim of relating it to that of *ASR* from a phylogenetic perspective  
18 and comparing the differences in selective pressure and codon usage. Phylogenetic analyses of  
19 different *LP3* homologs compared to *ASR* show that *LP3* is less divergent across species than  
20 *ASR* and that even when comparing the different sub-sections of the gene the divergence rate  
21 of *LP3* is lower than that of *ASR*. Analysis of different gene parameters showed that there were  
22 differences in GC1% and GC2% but not in total or GC3% content. All genes had a relatively  
23 high CAI value associated with a low to moderate ENC value, which is indicative of high  
24 translation efficiency found in highly expressed genes. Analysis of codon usage also showed  
25 that *LP3* preferentially uses different codons than *ASR*. Selective pressure analysis across most  
26 of the *LP3* and *ASR* genes used in this study showed that these genes were principally  
27 undergoing purifying selection, with the exception of *LP3-3* which seems to be undergoing  
28 diversifying selection most probably due to the fact that it likely recently diverged from *LP3-*  
29 *0*. This study thus provides insight in how *ASR* and *LP3* have diverged from each other while  
30 remaining homologous.

31 *Keywords: ASR, ABA/WDS, LP3, drought resistance, pine, selective pressures, codon usage,*  
32 *GC-content.*

33

## 34 **1. Introduction**

35 Land colonisation by plants during the Paleozoic has forced these to adopt several adaptive  
36 strategies to survive desiccation (Edwards and Selden, 1992). These strategies led to the  
37 development of organs such as roots for taking up water and the implementation of water stress  
38 management tactics like the closure of stomata and the modulation of osmotic pressures within  
39 the plant cell in an effort to maintain the plants' water potential (Chaves et al., 2003). Today,  
40 many plants species have adapted to be able to cope with drought through millennia of  
41 evolution, yet anthropogenic climate change is expected to dramatically affect the growth  
42 conditions of most plant species, notably through increased drought occurrence and aridity  
43 around the world.

44

45 Drought is a major hazard to the survival and development of commercially important plants,  
46 from both crops to forest tree species. In recent years, there has been an observed increase in  
47 drought occurrences notably in southern Europe, sub-Saharan Africa and many other areas  
48 around the world and this trend will only increase with time as climate change continues to  
49 progress (Gudmundsson and Seneviratne, 2016; Ruosteenoja et al., 2018). In this context, it is  
50 more important than ever to understand more about the mechanisms by which plants adapt and  
51 overcome water deficit stress in an effort to potentially produce more drought resistant varieties.

52

53 Water deficiency as a major stress for plant species is detected in many ways, with the  
54 signalling component being mediated largely through the phytohormone Abscisic acid (ABA)  
55 which is involved in stress response in plants, notably via its' effects on gene expression and  
56 osmotic pressure adjustment within the plant cell (Bray, 1993). ABA is also implicated in the  
57 plant response to cold stress and the ripening process. The ABA dependent pathway has been  
58 the focus of extensive studies in a multitude of species, notably *Arabidopsis thaliana* L. and  
59 *Populus tremula* L.

60

61 Since the 1990s several research projects have focused on a drought responsive gene called  
62 ABA, Stress and Ripening (*ASR*), first detected in tomato leaves yet remarkably absent from  
63 *Arabidopsis thaliana* (Iusem et al., 1993). This research has led to the discovery of many  
64 different *ASR* orthologues and paralogs, with tomato having five different *ASR* genes, and rice  
65 up to six to date (Dominguez and Carrari, 2015; Frankel et al., 2006). *ASR1* in tomato has by  
66 far been the most studied *ASR* gene in tomato. Transgenic expression of the *ASR* gene in  
67 *Arabidopsis* produced a phenotype similar to what is observed in *abi4* mutants in addition to an  
68 increased tolerance to salt, cold and other stresses (González and Iusem, 2014; Yang et al.,  
69 2005).

70

71 The *ASR* gene family contains a highly conserved midsection gene domain called the  
72 ABA/WDS domain (Pfam reference: PF02496), which is also highly conserved in *LP3*. The  
73 ABA/WDS domain is also expressed in mushrooms of the *Fomitopsis* genus, a membrane  
74 protein of *Pseudomonas* and angiotensin found in fern (Wang et al., 2002; Padmanabhan et al.,  
75 1997; González and Iusem, 2014). *ASR* in its native state is a disorganised, highly hydrophilic  
76 protein that requires two zinc ions to bind to lysine located in its N-terminal region to adopt its  
77 functional conformation, which leads to a protein dimerization and in turn bind to the plants'  
78 DNA sequence (Goldgur et al., 2007; González and Iusem, 2014). *ASR* proteins act as  
79 transcription factors that induce the expression of aquaporines, cellulose synthases (*CESA*) and  
80 glucanases. *ASR1*, the most studied of the *ASR* genes, is for example involved in sugar  
81 metabolism in response to drought (Dominguez and Carrari, 2015).

82

83 An *ASR* homolog called *LP3* was first discovered in the roots of loblolly pine (*Pinus taeda* L.)  
84 whose background constitutive expression was significantly upregulated in drought conditions

85 (González and Iusem, 2014; Padmanabhan et al., 1997; Wang et al., 2002). For the purposes of  
86 this study, while both genes are homologous, the terms *LP3* and *ASR* will be used to describe  
87 the gymnosperm and angiosperm sequences, respectively. *LP3* differs from *ASR* in that it  
88 contains a consequent insertion of 35 amino acids between its N-terminal and ABA/WDS  
89 regions and is present as a gene family (each individual gene isoform is called *LP3-0*, *LP3-1*,  
90 *LP3-2* and *LP3-3*; *LP3-2* and *LP3-3* have only been partially sequenced therefore only partial  
91 sequences are available) within pines and other gymnosperms (Chang et al., 1996;  
92 Padmanabhan et al., 1997). *LP3* transport into the nucleus is mediated by the putative C-  
93 terminal Nuclear Localisation Signal (NLS) of sequence K<sub>2</sub>KESK<sub>10</sub>EEEEKEAEGK<sub>18</sub>KKHHH  
94 (Padmanabhan et al., 1997; Wang et al., 2002). Alternatively, this NLS sequence might not be  
95 necessary due to the short size of the *LP3* protein which should allow it to diffuse through the  
96 nuclear envelope. Indeed research into *ASR* has shown that the NLS sequence to the one  
97 described above is not necessary for the *ASR* protein to diffuse into the nucleus (Ricardi et al.,  
98 2012). *LP3* has not been as extensively studied as *ASR*, probably due to the difficulty of genetic  
99 studies within gymnosperms. This lack of study is the motivation for this study.

100

101 The objective of this research work is to investigate and compare the rate and mode of evolution  
102 of two orthologous genes *LP3* and *ASR* genes. To achieve our objective we have conducted the  
103 following actions: We have (i) retraced the phylogeny of *LP3* as a member of the ABA/WDS  
104 family and relate it to the *ASR* genes, (ii) estimated the GC content and Codon Usage Bias  
105 (CUB), and (iii) determined the mode of evolution of different subsections of the *ASR/LP3*  
106 genes.

107

## 108        **2. Materials and Methods**

### 109        **2.1 Identification of LP3 and ASR genes**

110        Loblolly pine LP3-0, LP3-1, LP3-2 and LP3-3 CDSs were downloaded from NCBI  
111        (*Padmanabhan et al., 1997*). Homologous angiosperm ASR and where possible gymnosperm  
112        LP3 whole gene CDSs were then extracted from NCBI using these sequences as queries via  
113        BLASTN in the NCBI database (*Boratyn et al., 2013*) with an e-value of  $1^{e-10}$  as a threshold.  
114        More complete gymnosperm homologous sequences were also extracted via BLASTN in the  
115        Gymno Plaza database(v1.0) (*Altschul, 1997*). For naming sequences in the instances where the  
116        gymnosperm sequences were uncharacterized, comparison with loblolly pine LP3 sequences  
117        via the NEEDLE alignment tool were done and whichever alignment had the highest score was  
118        used to determine to which isoform the uncharacterized sequence was most likely to be  
119        orthologous. Those sequences were then number as LP3-0-1, LP3-0-2, LP3-0-3 etc. according  
120        to the species. Since LP3 and ASR are members of the ABA/WDS induced protein superfamily  
121        (*Chang et al., 1996; González and Iusem, 2014; Padmanabhan et al., 1997*) care was taken to  
122        ensure that all sequences retrieved contained the ABA/WDS domain using PFAM v.31  
123        (*Bateman and Finn, 2007; Mistry et al., 2007; Schaeffer et al., 2017*). Sequence names and  
124        accession numbers used in phylogenetic tree reconstruction according to species is shown in  
125        the Supplementary Table 1. Supplementary Table 2 represents majorly represented species in  
126        which three or more ABA/WDS genes are present and its use if further detailed in section 2.3.

127

### 128        **2.2 Phylogenetic analysis**

129        The phylogenetic history of LP3 and ASR was determined using MEGA X (Kumar et al., 2018).  
130        Firstly, this was done by looking at the whole nucleotide sequences, then by looking only at the  
131        conserved ABA/WDS region of the sequences, the conserved N-terminal zinc binding region  
132        before the gymnosperm insertion, and then finally by looking only at the variable C-terminal  
133        NLS/DNA binding region of the sequences, producing a total of four different trees called

134 FullSeq-tree, ABA/WDS-tree, N-tree and C-tree, respectively. The taxonomic phylogenetic  
135 tree was constructed using the Timetree software (Kumar et al., 2017).

136

137 For FullSeq-tree, sequences were aligned using the MUSCLE algorithm (Edgar, 2004), checked  
138 for errors and the multiple sequence alignment was exported for further analysis. The Maximum  
139 Likelihood (ML) Phylogenetic best fit model was determined in MEGA X by log-likelihood  
140 analysis of each model and the one with the highest AICc score was used. The resulting best fit  
141 model for the sequences used in tree FullSeq-tree was the Kimura 2 parameter model. The  
142 phylogenetic tree was created using the Maximum likelihood method combined with the  
143 Kimura 2 parameter model with a gamma parameter of 1, 30 with 1000 permutations.

144

145 ABA/WDS-tree was constructed by isolating the highly conserved ABA/WDS nucleotide  
146 domains from the MSA of *LP3* and *ASR* and exporting those for phylogenetic analysis. The ML  
147 phylogenetic model was determined in the same manner as previously described, with the  
148 resulting best model by log-likelihood analysis being the Kimura 2 parameter model. The tree  
149 was constructed using the ML method with the Kimura 2 parameter with a Gamma parameter  
150 equal to 1,0846 with 1000 permutations.

151

152 Tree N-tree was constructed by extracting the N-terminal nucleotide region of *LP3* and *ASR*.  
153 Due to the presence of incomplete sequences that did not cover this section of the gene, the  
154 following sequences were excluded from the phylogenetic analysis: *LP3-0 Cupressus*  
155 *sempervirens*; *LP3-1 Pinus sylvestris*; *LP3-1 Pinus hwangshenensis*; *LP3-0 Pinus*  
156 *masssoniana*; *LP3-2 Pinus taeda*; *LP3-2 Pinus sylvestris* and all *LP3-3* sequences. The ML  
157 phylogenetic model was determined in the same manner as previously described, with the  
158 resulting best model by log-likelihood analysis result being the Kimura 2 parameter model. The

159 tree was therefore constructed using the ML method with the Kimura 2 parameter model with  
160 a gamma parameter equal to 1, 27 with 1000 permutations.

161

162 Tree C-tree was constructed by focusing on the C-terminal NLS/DNA binding regions of the  
163 sequences. The ML phylogenetic model was determined in the same manner as previously  
164 described, with the resulting best model by log-likelihood analysis result being the Kimura 2  
165 parameter model. The following partial sequences were excluded from the phylogenetic  
166 analysis due to too short C-terminal sequences: *LP3-0 Cupressus sempervirens*, *LP3-0 Pinus*  
167 *masssoniana*; *LP3-2 Pinus taeda*; *LP3-2 Pinus sylvestris* and all *LP3-3* sequences. The tree  
168 was therefore constructed using the ML method with the Kimura 2 parameter model with a  
169 gamma parameter equal to 1, 5588 with 1000 permutations. Analysis of gene duplication events  
170 and construction of the corresponding gene duplication tree was also carried out in MEGA X,  
171 using FullSeq-tree as a template on which to perform the analysis.

172

### 173 **2.3 GC% and RCSU analyses**

174 Sequence names and accession numbers for determining GC and RCSU content according to  
175 species are shown in the Supplementary Table 2

176

177 The Relative Synonymous Codon Usage (RSCU) is a measure of the codon usage bias for a  
178 particular amino acid. As such codon bias is can be a measure of how efficient and accurate a  
179 given gene translation is. The RSCU of the ABA/WDS genes found in majorly represented  
180 species (species in which at least three different ABA/WDS genes are present) was extracted  
181 using MEGA X. The average RSCU values per amino acid were then calculated and used to  
182 determine which codon was on average the most used in a particular gene. Codons with RSCU  
183 values above 1 are abundant, whilst codons with RSCU values below 1 are less abundant.  
184 Codons for Methionine and Tryptophane were not included since these amino acids are encoded



185 by only one codon. Stop codons were not included either as they are only involved in  
186 transcription termination and therefore not in transcription efficiency.

187

188 Individual gene parameters from majorly represented species such as total GC, GC1, GC2, GC3  
189 contents, Codon Adaptive Index (CAI), and Effective Number of Nucleotides (ENC) were  
190 computed using CAICal (<http://genomes.urv.cat/CAIcal/>). The CAI is derived from the codon  
191 usage of highly expressed genes in organisms and is positively correlated with transcription  
192 levels. As such the CAI is often used as a proxy for expression levels (Sharp and Li, 1987). The  
193 ENC is a number corresponding to the overall codon bias in a given gene, with 20 symbolising  
194 a complete bias of only one codon per amino acid whereas a value of 61 symbolises a  
195 completely unbiased codon usage, with each available codon being used equally for a given  
196 amino acid (Wright, 1990). Statistical analyses were done in R using  $p=0,05$  as the significance  
197 threshold. Gene parameters were first compared using a Levene test to ensure variance equality  
198 among the different genes, followed by either ANOVA or a Kruskal-Wallis test. If either of  
199 these indicated the presence of a significantly different group then a Tukey HSD test was  
200 performed in the case of ANOVA and a pairwise Wilcoxon test in the case of a Kruskal-Wallis.  
201 Pearson correlations between the different gene parameters were also done. For this the  
202 different ASR and LP3 genes were grouped together.

203

#### 204 ***2.4 Mode of evolution of different subsections of the ASR/LP3 gene***

205 A codon-by-codon selective pressure analysis provides insights into which amino acids in a  
206 protein are undergoing selective constraints or not. This in turn allows one to suggest which  
207 amino acids are likely to change over time. Visualisation of codon selective pressure as defined  
208 by the ratio of synonymous to non-synonymous codons  $\omega = dN/dS$  on the *LP3-0* gene was  
209 done using the complete CDS of all *LP3-0* homologous sequences were uploaded to the  
210 Selecton server for selective pressure analysis using the M8 model that allows for positive

211 selection (Stern et al., 2007). The sequences were aligned in the server using the MUSCLE  
212 algorithm (Edgar, 2004) and the *Pinus taeda LP3-0* CDS was set as the reference query.  
213 Statistical analysis of the calculated selective pressure was also performed using Selecton with  
214 default settings by calculating the log likelihood ratio between M8 and the null model M8a.  
215 The same procedure was repeated for *LP3-1*, *LP3-3*, *ASR1*, *ASR2*, *ASR3* and *ASR4*. *P.taeda*  
216 *LP3* and *S. lycopersicum ASR* sequences were set as references on which to visualise sites of  
217 selective pressure. There were not enough *LP3-2* orthologous sequences for this analysis to be  
218 performed on it.

219

### 220 **3. Results**

#### 221 **3.1 Phylogenetic analysis of LP3 and ASR**

222 On a broad level, it can be seen that *LP3-1* is the most ancestral form of *LP3*, from which *LP3-*  
223 *2* diverged, followed by *LP3-0* and *LP3-3*. The *ASR* gene phylogeny show that *ASR4* is the  
224 ancestral sequence in tomato, followed by *ASR3*, being *ASR2* and *ASR1* the result of are more  
225 recent diverge event (Figure 1). The clear distinction between the *ASR* and *LP3* seems to

226 correlate with the divergence of angiosperms and gymnosperms, around 313 MYA  
227 (Supplementary Figure 1, [www.timetree.org](http://www.timetree.org)).

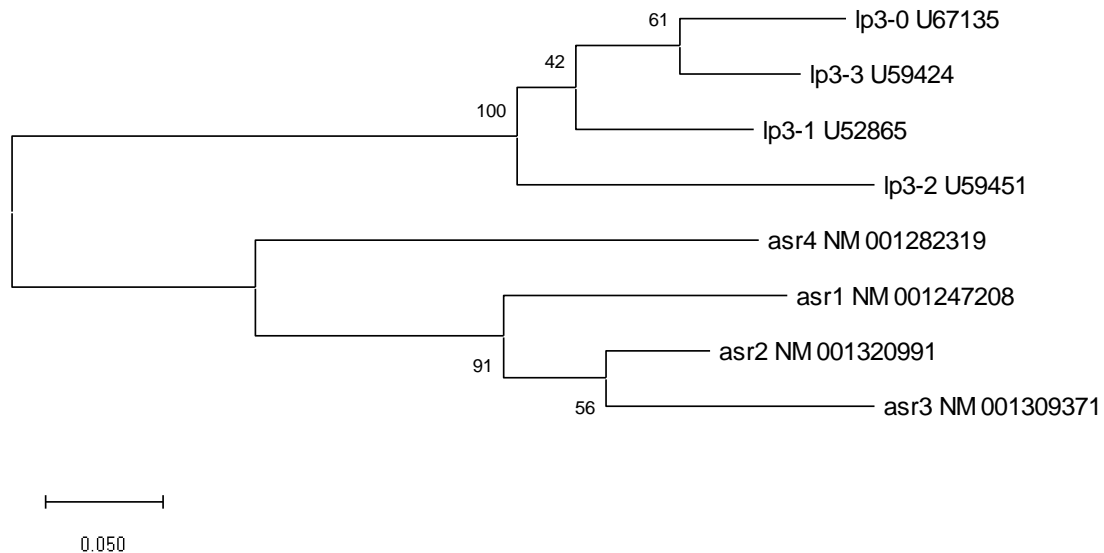

228

229 *Figure 1: Phylogenetic tree of Pinus taeda LP3 and Solanum lycopersicum ASR sequences.*

230 FullSeq-tree (*Figure 2*) shows that there is a clear divergence between the angiosperm ASR and  
231 the gymnosperm LP3 sequences. This could be to certain extent be attributed to the sequence  
232 insertion present between the N-terminal zinc binding domain and ABA/WDS regions in  
233 gymnosperm. Low bootstrap values within the gymnosperm nodes could be explained by the  
234 general high similitude between sequences which would result in them easily swapping  
235 positions during different bootstrap analyses. It can be observed that the LP3 sequences cluster  
236 together according to genus and isoform. There is also perfect clustering of LP3-1 and LP3-2  
237 sequences within the *Pinus* cluster, however this is not the case when observing the LP3-3  
238 cluster. In that instance, clustering of LP3-3 occurs with LP3-0-2 and LP3-0-3 of *Pinus*  
239 *sylvestris*. This might be indicative of orthology between LP3-3 and the *Pinus sylvestris*  
240 sequences shown. The grouping together of *Pinus taeda* LP3-3 and *Pinus taeda* LP3-0-2 with  
241 a very high bootstrap score could suggest that LP3-0-2 (PITA\_00002958) might be actually a  
242 complete sequence of LP3-3. In *Picea* most of the sequences were annotated as LP3-0, except

243 one sequence that was annotated as LP3-1 (MA45729). No *LP3-2* and *LP3-3* were available.  
244 The *ASR* sequences also show clear clustering together of *ASR1*, *ASR2* and *ASR3* sequences.  
245 The *ASR1* of *Oryza sativa*, *ASR3* of *Zea mays*, *ASR2* of *Vitis vinifera* and *ASR3* of *Populus*  
246 *trichocarpa* show signs of divergence from the other *ASR* sequences. There are big genetic  
247 distances between the different *ASR* clusters, indicative of substantial divergence between the  
248 *ASR* genes in the angiosperms.

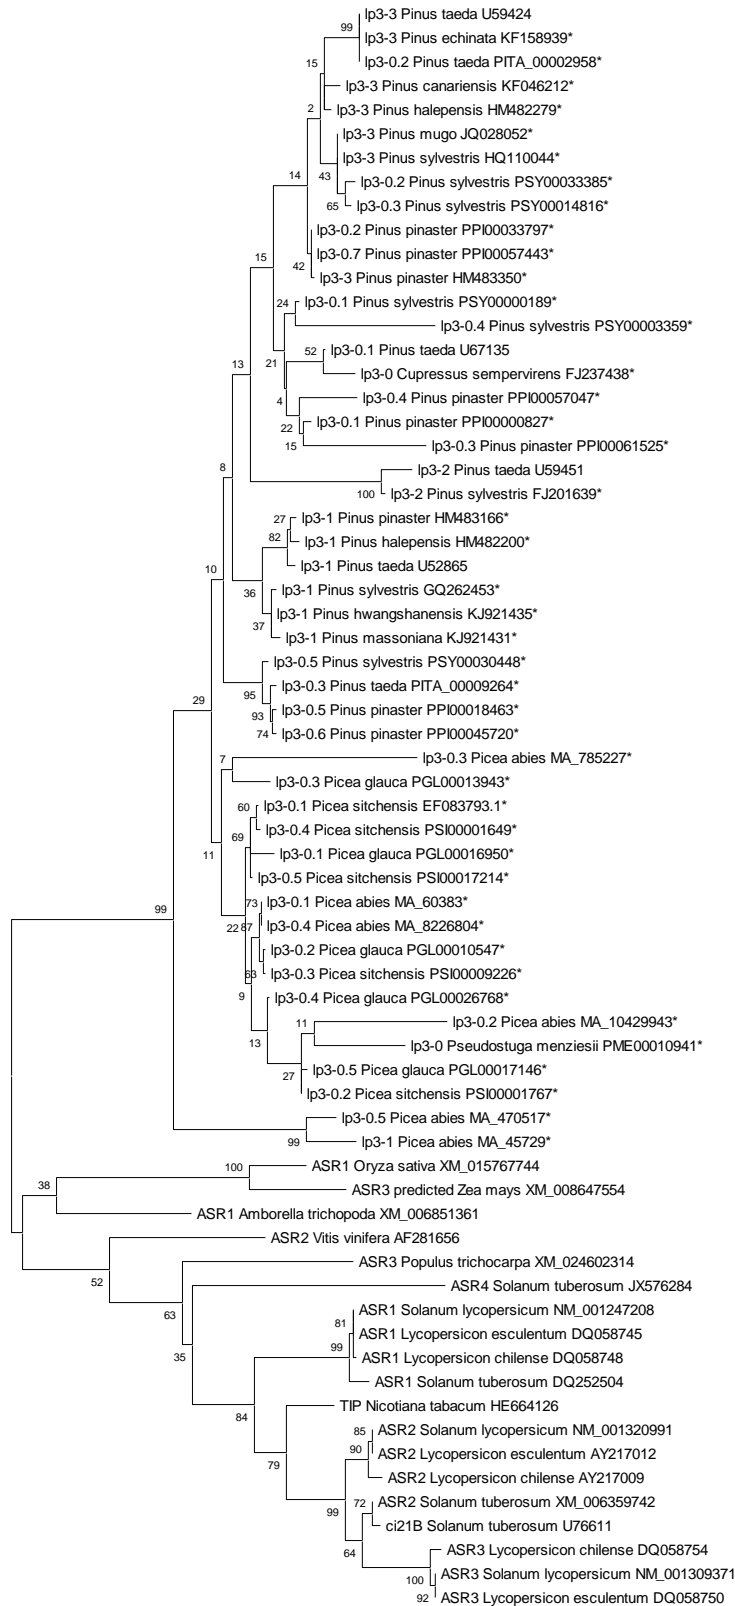

250 *Figure 2: FullSeq-tree corresponding to the entirety of available CDS of ASR/LP3 sequences. Constructed in*  
251 *MEGAX using the ML method and the K2 model + gamma =1,2882. Genetic distance is given in number of*  
252 *substitutions per site. Bootstrap values are*

253

254 Looking at ABA/WDS-tree (Figure 3) which focuses on the central ABA/WDS domain, there  
255 is yet again another clear grouping of angiosperm and gymnosperm sequences together. Within  
256 the gymnosperm grouping one can observe the sub-grouping of *LP3-1* and *LP3-2* together,  
257 while similarly to FullSeq-tree, the *LP3-3* sequences are again broadly grouped together with  
258 some *LP3-0* sequences grouped alongside them. The angiosperm sequences also show clear  
259 clustering of *ASR1*, *ASR2* and *ASR3* sequences with the *Oriza sativa ASR1* and *Zea mays ASR3*  
260 seeming to diverge from the other *ASR* sequences. As in FullSeq-tree, there is also a clear  
261 clustering according to genus, with *Picea* and *Pinus* sequences clustering together, respectively.

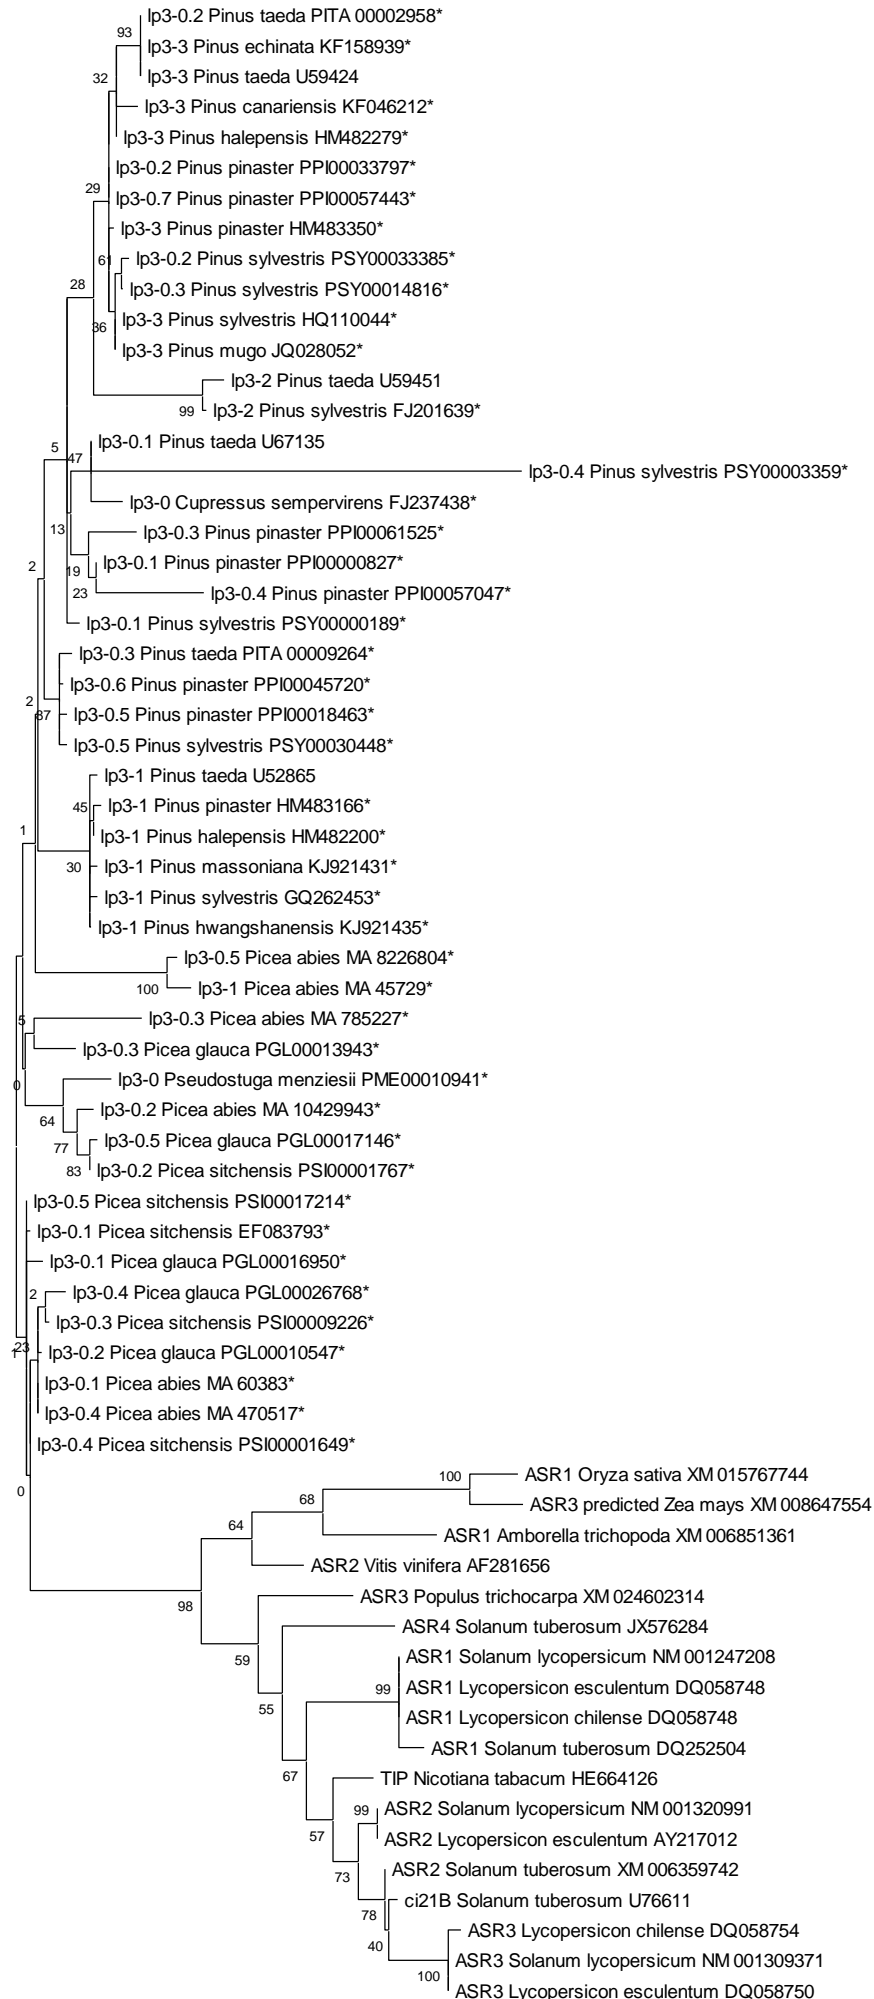

263 *Figure 3: ABA/WDS-tree focusing on the conserved ABA/WDS domain within each gene. Constructed in MEGAX*  
264 *using the ML method and the K2 model with gamma=1,0846. Genetic distances are in number of substitutions per*  
265 *site. Bootstrap values are shown next to each node*

266

267 N-tree focuses on the N-terminal region of *ASR* and *LP3*, to which zinc ions are theorised to  
268 bind (Figure 4), here it can be observed that there is not a definite separation between  
269 angiosperm and gymnosperm sequences, with *ASR2* from *Vitis vinifera* and *ASR4* from  
270 *Solanum tuberosum* being the most divergent sequences when focusing on the N-terminal  
271 region. *LP3-1* sequences in *Pinus* formed a different cluster although with low support. After  
272 this node, *ASR* and *LP3* sequences mostly segregate according to their order. Like the trees  
273 previously analysed, the *ASR* sequences cluster according to *ASR1*, *ASR2* and *ASR3*, with the  
274 *Oriza sativa ASR1* and *Zea mays ASR3* diverging together. In contrast to previous trees, there  
275 is a less clear clustering of *LP3* sequences according to genus. There remains however a very  
276 short genetic distance between each of the *LP3* sequences, indicative yet again of a high level  
277 of conservation between the sequences.



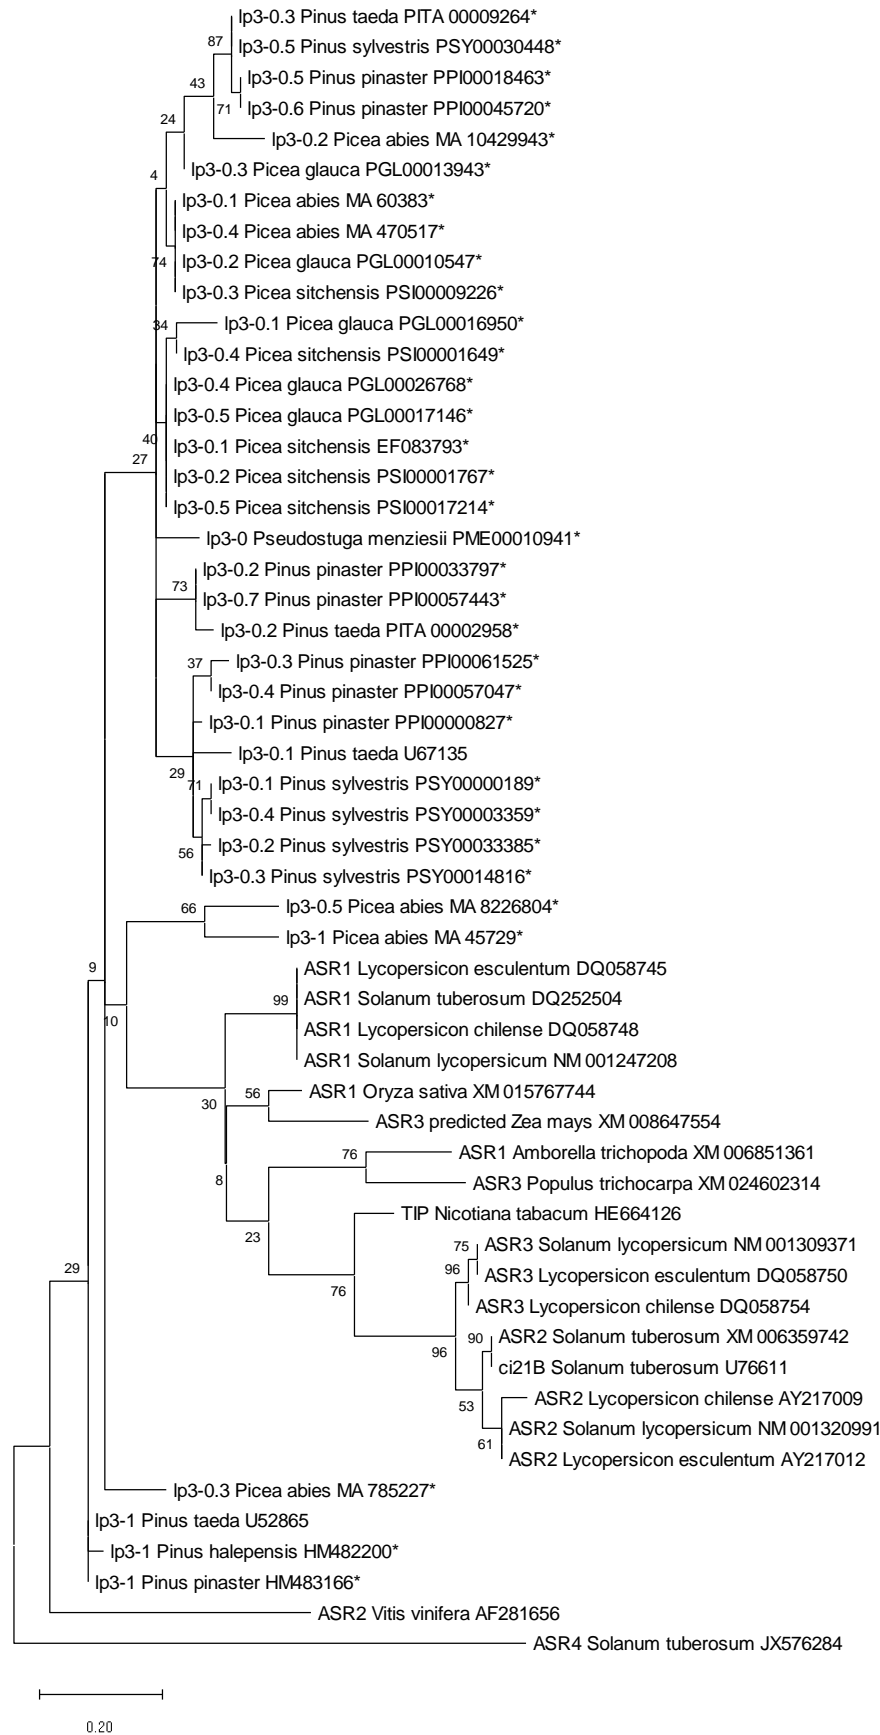

279 *Figure 4: N-tree focusing on N-terminal of ASR and LP3 genes. Constructed with MEGAX and using the ML*  
280 *method and K2 model with  $\gamma = 1,3701$ . Genetic distances are in number of substitutions per site. Bootstrap*  
281 *values are shown next to each node.*

282

283 C-tree, which focuses on the variable C-terminal regions of *ASR* and *LP3* which contains the  
284 NLS/DNA binding domain (Figure 5), again shows partial segregation of *ASR* and *LP3*  
285 sequences. Here the tree is rooted by the *ASR4* of *Solanum tuberosum*, *LP3-0-3* *Pinus pinaster*  
286 and *Picea abies* *LP3-0-2* and *LP3-0-3* sequences, indicative that these sequences are the most  
287 divergent in the C-terminal NLS region. Subsequently, the *ASR* and *LP3* sequences do segregate  
288 according to their order (similar to what can be observed for the other trees). Within the *ASR*  
289 cluster the *ASR1*, *ASR2* and *ASR3* groups show low genetic distances, which suggests that the  
290 C-terminal region of those sequences are well conserved. The *LP3* C-terminal sequences also  
291 do not show much divergence between them as seen by the small genetic distances between the  
292 sequences. The exception are *LP3-0-3*, *LP3-0-4* and *LP3-0-2* sequences of *Picea abies*, which  
293 show a high level of divergence from the other *LP3* sequences. The segregation within the *LP3*  
294 sequences showed a similar clustering mostly according to the genus.

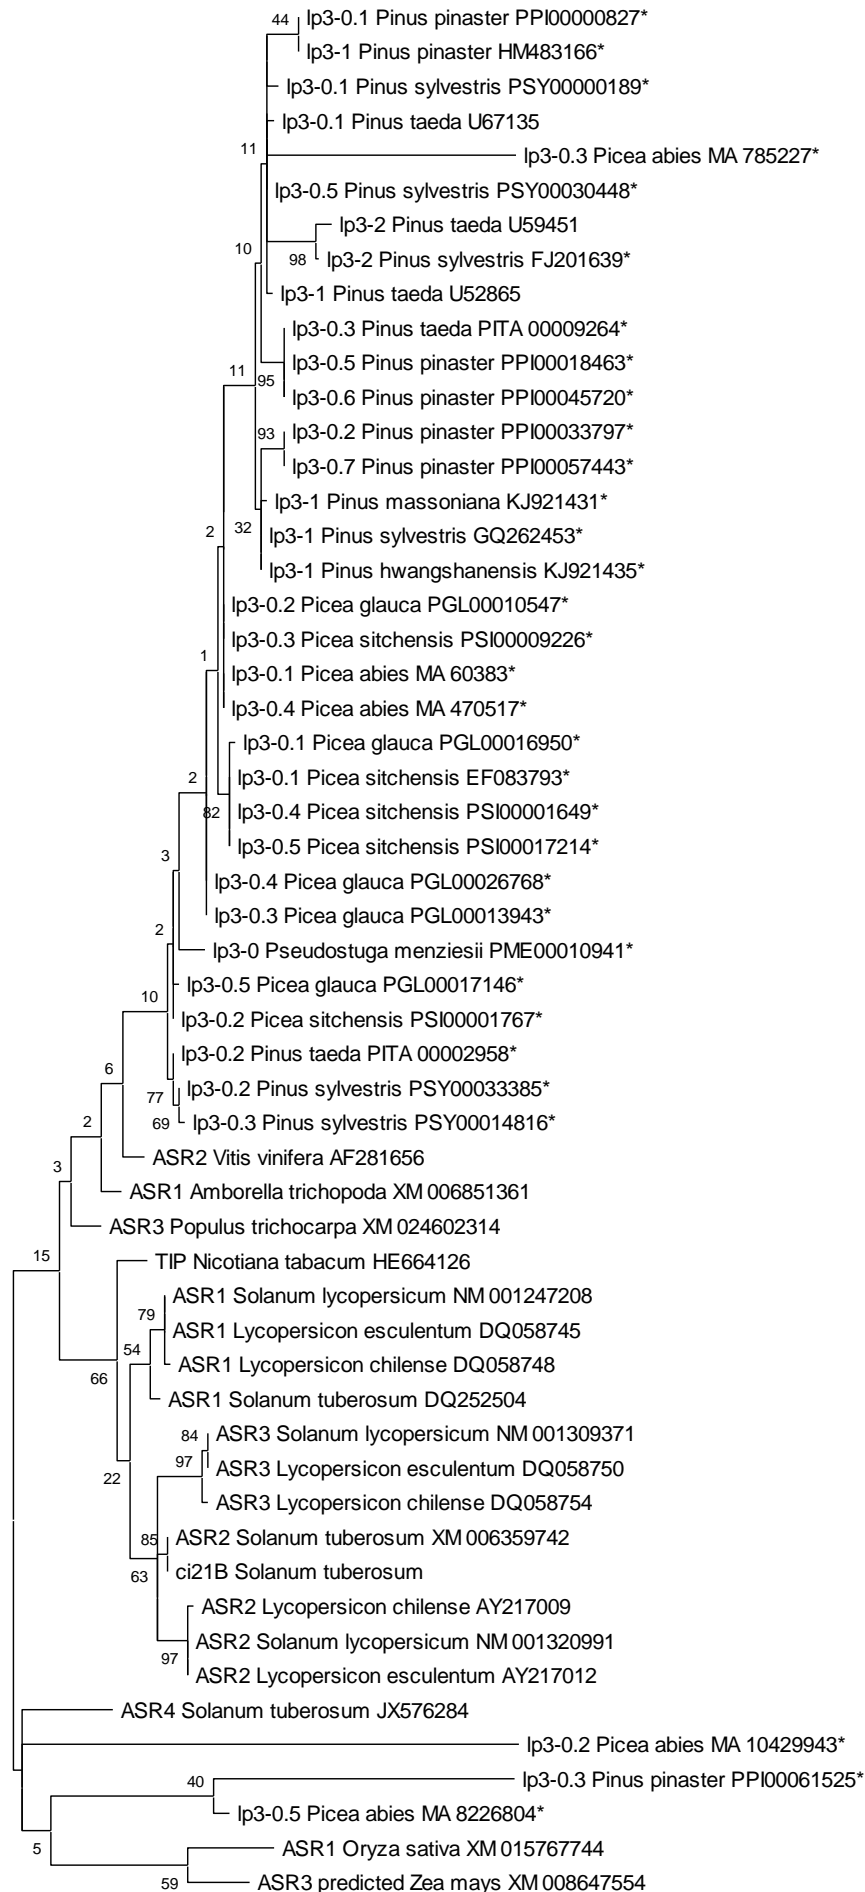

0.20

296 *Figure 5: C-tree focusing on the C-terminal region of ASR and LP3 genes. Constructed with MEGA X and using*  
297 *the ML method with K2 model and gamma= 1,5588. Genetic distances are in number of substitutions per site.*  
298 *Bootstrap values are shown next to each node*

299

### 300 **3.2 Gene parameters and RSCU analyses**

301 There appear to be differences in average preferential codon usage between the different  
302 ABA/WDS genes (Table 1, Figure 6). Both LP3\_0 and LP3\_3 have the same most highly used  
303 codon AGG, encoding arginine, at RSCU values 3,71 and 6 respectively. LP3-2 and ASR2 both  
304 preferentially use CCA, encoding proline, at RSCU values 4 and 2,77 respectively.  
305 Furthermore, ASR2 has a second codon AGC, encoding serine, at RSCU 2,77. LP3\_1, ASR3  
306 and ASR4 have all got codons encoding for serine as their most used codons with codons UGC,  
307 AGC and AGU at RSCU values 3,86 , 3,27 and 2,8 respectively. There were similarities in  
308 least used codons, such as the arginine encoding CGG and leucine encoding CUA.

| Gene  | AA                 | Codon       | RSCU |
|-------|--------------------|-------------|------|
| ASR1  | Leucine            | CUC         | 2,63 |
| ASR2  | Proline,<br>Serine | CCA,<br>AGC | 2,77 |
| ASR3  | Serine             | AGC         | 3,27 |
| ASR4  | Serine             | AGU         | 2,8  |
| LP3_0 | Arginine           | AGG         | 3,71 |
| LP3_1 | Serine             | UCG         | 3,86 |
| LP3_2 | Proline            | CCA         | 4    |
| LP3_3 | Arginine           | AGG         | 6    |

309 *Table 1: Average most used codon in ABA/WDS genes.*

### Average RSCU values of ABA/WDS genes

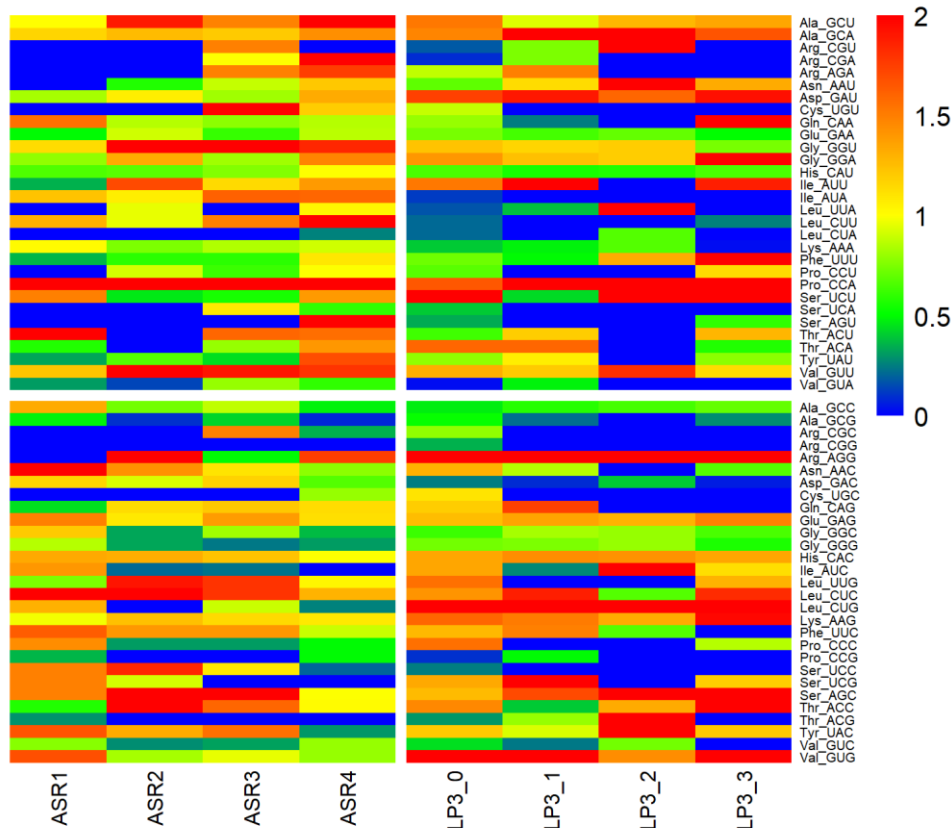

310  
311 *Figure 6: Heatmap of average codon usage per ABA/WDS genes. Codons separated according to whether they*  
312 *are AU or GC ended. Average codon usage above 1,5 are indicated in red while codon usage lower than 0,5 are*  
313 *indicated in blue. Produced in R.*

314 In all cases, the average GC2% of the ABA/WDS genes was lower than both average GC1%  
315 and GC3%. With the exception of ASR1, all ABA/WDS genes had on average higher GC1%  
316 than GC3% (Table 2). Levene test results showed that only GC1 and GC2 respected the equal  
317 variance among groups assumption for ANOVA ( $p > 0,05$ ). Total GC, GC3, ENC and CAI were  
318 thus tested using a Kruskal-Wallis test. GC1, GC2 and CAI had significant differences between  
319 the ABA/WDS genes ( $p < 0,05$ ) whereas total GC, GC3 and ENC showed no significant  
320 difference between the ABA/WDS genes ( $p > 0,05$ ).

321

322

323

324

| Gene  | Length(bp) | CAI    | GC%tot      | GC1%        | GC2%        | GC3%        | ENC         |
|-------|------------|--------|-------------|-------------|-------------|-------------|-------------|
| ASR1  | 323,25     | 0,8428 | 56,825      | 71,25       | 27,2        | 72,05       | 44,775      |
| ASR2  | 336        | 0,852  | 55,9        | 69,125      | 31,8        | 66,7        | 37,725      |
| ASR3  | 337,5      | 0,866  | 56,425      | 69,05       | 33,1        | 67,175      | 41,9        |
| ASR4  | 629        | 0,8217 | 43,46666667 | 56,5        | 36,6        | 37,33333333 | 50,03333333 |
| LP3_0 | 435,7      | 0,8472 | 50,69333333 | 64,76333333 | 30,43666667 | 56,89       | 51,02333333 |
| LP3_1 | 300,75     | 0,8528 | 51,25       | 68,975      | 27,875      | 56,975      | 42,4        |
| LP3_2 | 306        | 0,8435 | 51,6        | 71,95       | 29,35       | 53,5        | 53,9        |
| LP3_3 | 272        | 0,9073 | 52,83333333 | 67,73333333 | 35,43333333 | 55,43333333 | 37,33333333 |

325 *Table 2: Average gene parameters of ABA/WDS genes.*

326 Analysis of GC1 (Figure 7) suggests that on average ASR1 and LP3\_2 have a higher GC1%  
 327 than LP3\_0, which itself has a higher GC1% than ASR4. ASR2, ASR3, LP3\_1 and LP3\_3 do  
 328 not have significantly different GC1% from ASR1, LP3\_2 and LP3\_0.

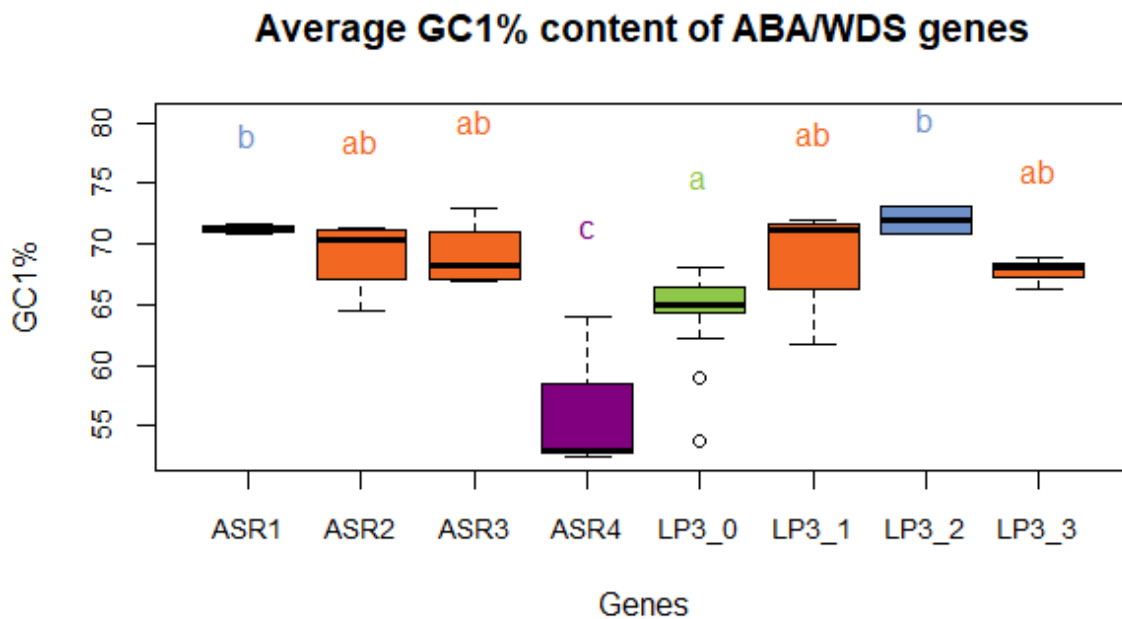

329

330 *Figure 7: Comparison of the average GC1% per ABA/WDS gene, done in R, using a one-way ANOVA followed*  
 331 *by Tukey HSD test.*

332 Analysis of GC2% (Figure 8) suggests that ASR4 has on average a significantly higher GC2%  
 333 than ASR1, LP3\_0, LP3\_1 and LP3\_2. In turn, this analysis suggests that on average LP3\_3  
 334 has a significantly higher GC2% than LP3\_0. By contrast, ASR2, ASR3 and LP3\_2 do not  
 335 appear to have significantly different GC2% from each other.

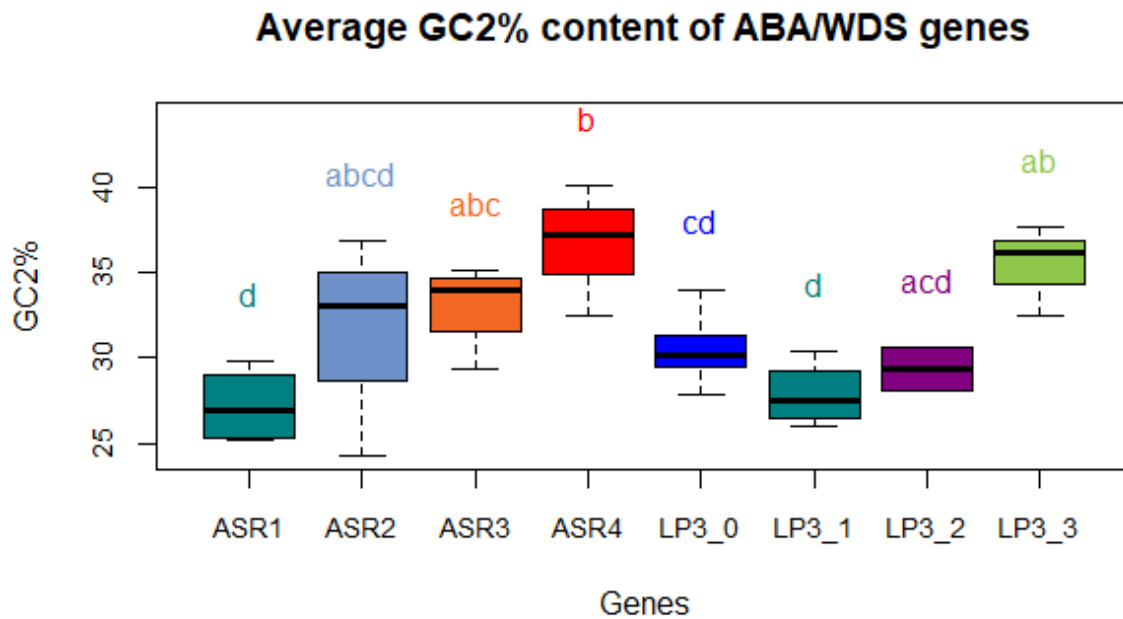

336

337 *Figure 8: Comparison of the average GC2% per ABA/WDS gene, done in R, using a one-way ANOVA followed*  
338 *by Tukey HSD test.*

339 There is also variation in the average CAI of ABA/WDS genes between the different majorly  
340 represented species (Figure 9). *Picea abies*, *Picea glauca*, *Populus trichocarpa*, *Solanum*  
341 *lycopersicum* and *Solanum tuberosum* have similar CAI levels to each other and are  
342 significantly lower than *Oryza sativa*, *Picea sitchensis*, *Pinus pinaster*, *Pinus sylvestris*, *Pinus*  
343 *taeda* and *Zea mays*. *Oryza sativa* appears to have a significantly higher CAI than all other  
344 species apart from *Picea sitchensis*, *Pinus pinaster* and *Zea mays*. Finally, *Pinus sylvestris*  
345 appears to have a significantly lower average CAI than *Pinus pinaster*, *Zea mays* and *Oryza*  
346 *sativa*, but is significantly higher on average than *Picea abies*, *Picea glauca*, *Populus*  
347 *trichocarpa*, *Solanum lycopersicum* and *Solanum tuberosum* yet is not significantly different  
348 from *Picea sitchensis* and *Pinus taeda*.

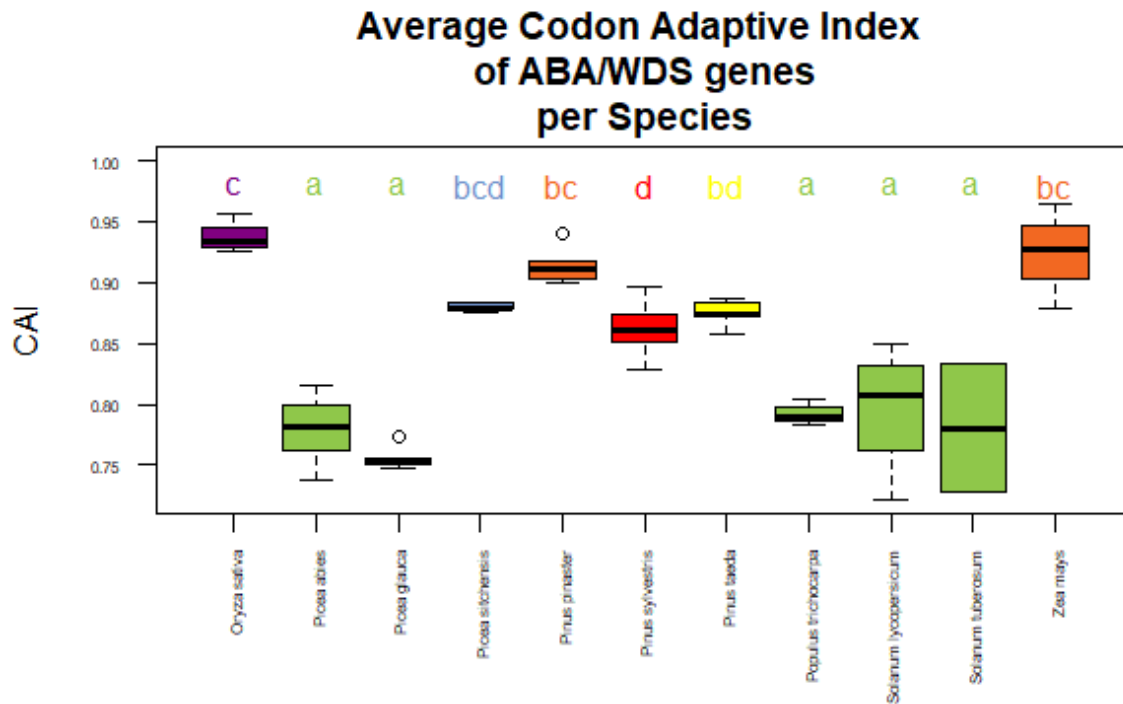

349

350 *Figure 9: CAI per species of the ABA/WDS genes obtained from the values of majorly represented species, done*  
 351 *in R, using a Kruskal-Wallis test followed by a pairwise Wilcoxon test.*

352

353 Significant correlations were found between the different gene parameters in ASR and LP3  
 354 (Table 3; Table 4). In both ASR and LP3, gene length was negatively correlated with total  
 355 GC%, GC1% and positively correlated with ENC. CAI was positively correlated with total  
 356 GC% and GC3% in ASR and was positively correlated with GC1%. CAI was also negatively  
 357 correlated with ENC in both cases. Total GC% was in turn positively correlated with GC1%  
 358 and GC3% in both ASR and LP3 genes however total GC% was correlated with ENC in ASR  
 359 only. GC1% was negatively correlated with GC2% in both ASR and LP3 and positively  
 360 correlated with GC3% in ASR only. GC3% was negatively correlated with ENC in ASR but  
 361 displayed no significant correlation with ENC in LP3.

|          | Length       | CAI         | GC_tot      | GC_one       | GC_two | GC_three | ENC    |
|----------|--------------|-------------|-------------|--------------|--------|----------|--------|
| Length   |              | 0.5806      | 0.0413      | 0.0000       | 0.0294 | 0.0602   | 0.5827 |
| CAI      | -0.14        |             | 0.0001      | 0.4982       | 0.1384 | 0.0000   | 0.0000 |
| GC_tot   | <b>-0.50</b> | <b>0.80</b> |             | 0.0182       | 0.5516 | 0.0000   | 0.0000 |
| GC_one   | <b>-0.89</b> | 0.18        | <b>0.56</b> |              | 0.0048 | 0.0263   | 0.4806 |
| GC_two   | <b>0.53</b>  | 0.37        | 0.16        | <b>-0.65</b> |        | 0.5729   | 0.0572 |
| GC_three | -0.46        | <b>0.81</b> | <b>1.00</b> | <b>0.54</b>  | 0.15   |          | 0.0000 |



362 ENC | 0.14 **-0.90** **-0.84** -0.18 -0.47 **-0.84**  
 363 Table 3: Pearson correlation matrix of ASR genes. Correlation values indicated below diagonal and p-values indicated above diagonal. Significant correlations shown in bold.

|          | Length       | CAI          | GC_tot      | GC_one       | GC_two | GC_three | ENC    |
|----------|--------------|--------------|-------------|--------------|--------|----------|--------|
| Length   |              | 0.5357       | 0.0284      | 0.0020       | 0.7432 | 0.6149   | 0.0018 |
| CAI      | -0.10        |              | 0.1385      | 0.0431       | 0.7252 | 0.6568   | 0.0004 |
| GC_tot   | <b>-0.35</b> | 0.24         |             | 0.0000       | 0.8198 | 0.0000   | 0.3053 |
| GC_one   | <b>-0.48</b> | <b>0.33</b>  | <b>0.58</b> |              | 0.0110 | 0.9112   | 0.1220 |
| GC_two   | -0.05        | 0.06         | 0.04        | <b>-0.40</b> |        | 0.1903   | 0.5746 |
| GC_three | 0.08         | -0.07        | <b>0.65</b> | -0.02        | -0.21  |          | 0.5214 |
| ENC      | <b>0.48</b>  | <b>-0.54</b> | -0.17       | -0.25        | -0.09  | 0.11     |        |

364 Table 4 Pearson correlation matrix of LP3 genes. Correlation values indicated below diagonal and p-values  
 365 indicated above diagonal. Significant correlations shown in bold.

366

### 367 3.3 Mode of evolution of different subsections of the ASR/LP3 gene

368 The reference sequences of *LP3-0*, *LP3-1*, *ASR1*, *ASR2*, *ASR3* and *ASR4* show signs of  
 369 purifying selection, mainly focused on K, H and E residues, and no sites of positive selection  
 370 (Figure 10, Figure 11, Figure 13, Figure 14, Figure 15, Figure 16; Supplementary Table  
 371 3,4,6,7,8,9). In contrast, *LP3-3* presents signs of positive selection on residues N, S and T at  
 372 positions 34, 37 and 61, respectively (Figure 12, ). These residues tend to turn into E, T and A,  
 373 respectively (w-values = 2,8; 2,9; 2,9; p-values= 2,  $1 \times 10^{-14}$ ; 1,  $2 \times 10^{-19}$ ; 1,  $4 \times 10^{-19}$ ,  
 374 Supplementary Table 5). On average, the ABA/WDS genes investigated here are all undergoing  
 375 purifying selection, and all tend to similar amino acid sequences and codon usage as shown by  
 376 the low Ka/Ks values between gene pairs (Table 5).

|        |       | LP3-0 | LP3-1 | LP3-2 | LP3-3 |
|--------|-------|-------|-------|-------|-------|
| U67135 | LP3-0 |       |       |       |       |
| U52865 | LP3-1 | 0.21  |       |       |       |
| U59451 | LP3-2 | 0.74  | 0.53  |       |       |
| U59424 | LP3-3 | 0.35  | 0.28  | 0.74  |       |

  

|             |      | ASR1 | ASR2 | ASR3 | ASR4 |
|-------------|------|------|------|------|------|
| NM001247208 | ASR1 |      |      |      |      |
| NM001320991 | ASR2 | 0.15 |      |      |      |
| NM001309371 | ASR3 | 0.25 | 0.06 |      |      |
| NM001282319 | ASR4 | 0.16 | 0.10 | 0.21 |      |

377 Table 5: 1 Ka/Ks estimates between (a) LP3 genes in *Pinus taeda*, and (b) ASR genes in tomato.

```

1          11          21          31          41
M S E E K H H H L L H H K K E E E S E N V P S E V V C A E T T T A Y G D E V I Q S A D V Y A A G E
51         61         71         81         91
V N D D K F A E Y E K A R K E E K E E E H L E E L G G L G T V A A G A F A L H E K A S K K D P E N
101        111       121       131       141
A R K K I E E E I A A A A A V G A G G Y V F H E H H E E E S K E E E K E A E G K K H H H L F Y V
151
R C H

```

**Legend:**

The selection scale:

1 2 3 4 5 6 7  
 Positive selection      Purifying selection

378

379 *Figure 10: Selective pressures on LP3-0. Yellow colours indicate sites of positive/diversifying selection; purple*  
 380 *colours indicate sites of purifying selection. Figure produced using Selecton.*

```

1          11          21          31          41
M S E E K Q H H H L F H H H K E D G G E Q V I E S T D V Y A A G N V D E Y E K A K K D E K H H K H M
51         61         71         81         91
E H L G E M G T V A A G A F A L H E K H A D K K D P E H A H R K K I E E E V A A A A A V G A G G Y V
101        111       121
F E E E E E K K E S K E E E K E A E G K K H H H L F

```

**Legend:**

The selection scale:

1 2 3 4 5 6 7  
 Positive selection      Purifying selection

381

382 *Figure 11: Selective pressures on LP3-1. Yellow colours indicate sites of positive/diversifying selection; purple*  
 383 *colours indicate sites of purifying selection. Figure produced using Selecton.*

```

1          11          21          31          41
D E N D N P P S E V V Y S E T T T A Y G D E V I Q S A D V Y A T G N V N S D E Y E K A R K E E K H H
51         61         71         81         91
K H M E E V G G L G T M A T G A F A L H E K H A E K K D P E H A H R H K I E E E I A A A A A V G E G
G

```

**Legend:**

The selection scale:

1 2 3 4 5 6 7  
 Positive selection      Purifying selection

384

385 *Figure 12: Selective pressures on LP3-3. Yellow colours indicate sites of positive/diversifying selection; purple*  
 386 *colours indicate sites of purifying selection. Figure produced using Selecton.*

```

1      11      21      31      41
M E E E K H H H H H L F H K D K A E E G P V D Y E K E I K H H K H L E Q I G K L G T V A A G A Y A
51     61     71     81     91
L H E K H E A K K D P E H A H K H K I E E E I A A A A V G A G G F A F H E H H E K K D A K K E E K
101
K A E G G H H H L F

```

**Legend:**

The selection scale:

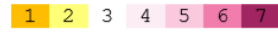

Positive selection      Purifying selection

387

388 *Figure 13: Selective pressures on ASR1. Yellow colours indicate sites of positive/diversifying selection; purple*  
 389 *colours indicate sites of purifying selection. Figure produced using Selecton.*

```

1      11      21      31      41
M A E E K H Q H H H H L F H H K N K E D E G G P V D Y E K E V H H S H L E K I G E L G A V A A G A
51     61     71     81     91
L A L H E K H K A K K D P E H A H K H K I E E E I A A V A A V G A G G F A F H E H H Q K K D A K K E
101     111
K K E V E G G H H H H H Y

```

**Legend:**

The selection scale:

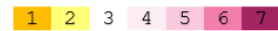

Positive selection      Purifying selection

390

391 *Figure 14: Selective pressures on ASR2. Yellow colours indicate sites of positive/diversifying selection; purple*  
 392 *colours indicate sites of purifying selection. Figure produced using Selecton.*

```

1      11      21      31      41
M A E E K Q H H R L F H H K N R E E G G P V D H K K K V K H H S H L Q K I G E L G A V A A G A Y A
51     61     71     81     91
L H E K H K A K K D P E N A H K H K I K Q E I A A V A A V G A G G F A F H E H H Q K K E A K K E K K
101
A A E K G R H H

```

**Legend:**

The selection scale:

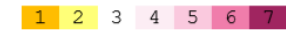

Positive selection      Purifying selection

393

394 *Figure 15: Selective pressures on ASR3. Yellow colours indicate sites of positive/diversifying selection; purple*  
 395 *colours indicate sites of purifying selection. Figure produced using Selecton.*

```

1      11      21      31      41
MAEEK1KKHHFG2 GLFNHHK1NKE1 EDTPIE1EKTTY1 EETTYE1DSEK1 TSTYGD1N1TYG1
51     61     71     81     91
EKTSY1GDDTY1 GK1KT1TT1Y1GD1D1 NKYSE1EKTSY1G1 DDTYDE1EKTNT1 YGDEN1KYGE1K1
101    111    121    131    141
TSYSE1GDDNK1 YGEKTSY1GGD1 TYGE1EKPTS1YG1 GDNTYGE1EKTS1 YGGGDEN1KY1G1
151    161    171    181    191
EKTSY1GEKAS1 YGGGDD1NKY1G1 EKTSY1GN1EEG1 GYGGGV1GAYS1 SETTTN1YEEN1
201    211    221    231    241
DDSGTK1TSED1 Y1KEE1KK1HH1KH1 L1EE1LG1LG1AV1 AAGA1FAL1HEK1 HKA1EK1DE1EH1A1
251    261    271    281    291
H1KK1IE1EE1IA1 AVAA1VGAG1GE1 A1HH1HH1Q1KK1E1 AK1EEEE1EE1EG1 K1KK1HH1EE1

```

**Legend:**

The selection scale:

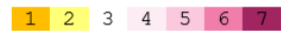

Positive selection      Purifying selection

396

397 *Figure 16: Selective pressures on ASR4. Yellow colours indicate sites of positive/diversifying selection; purple*  
 398 *colours indicate sites of purifying selection. Figure produced using Selecton.*

399

#### 400 **4. Discussion**

##### 401 **4.1 LP3 genes are less divergent than ASR genes**

402 While there is ample evidence that *ASR* and *LP3* belong to the same gene family (González and  
 403 Iusem, 2014), it is quite interesting that the nucleotide phylogeny reveals a clear segregation  
 404 between the gymnosperm and angiosperm sequences, even within a highly conserved domain  
 405 like the ABA/WDS domain. The separation between *LP3* and *ASR* sequences are consistent  
 406 with previous phylogenetic knowledge that angiosperms and gymnosperms diverged around  
 407 313 MYA (Barbara-Montoya et al 2018), between the Pennsylvanian and Permian periods,  
 408 thereby giving the *ASR* and *LP3* genes within both orders ample time to diverge (Hedges et al.,  
 409 2015; Kumar et al., 2017).

410 The FullSeq-tree is corroborated by a previous study on *ASR* genes (Frankel et al., 2006). The  
 411 phylogenetic analyses of different sub-sections of the *ASR/LP3* genes provide insight into the  
 412 different divergence rates occurring within each of them. The ABA/WDS-tree, which focuses  
 413 on the ABA/WDS subsection, shows that there is very little divergence between the *LP3*  
 414 sequences, unlike the *ASR* sequences. This is indicative of a high level of similarity of the

415 ABA/WDS domain within *LP3* that is not seen in *ASR*. This can be explained by the action of  
416 negative selection acting on the *LP3* sequences, or that the rate of substitutions in gymnosperms  
417 is lower than in angiosperms (Palmé et al 2009; Buschiazzi et al 2012; De La Torre et al.,  
418 2017).

419 This low level of phylogenetic divergence within *LP3* can also generally be observed in the  
420 other two domain-based trees (N-terminal tree and C-terminal tree). The N-terminal tree  
421 focused on the putative zinc binding domains in the N-terminal region of *ASR/LP3* genes,  
422 therefore it would make sense that there is a low level of divergence occurring since *ASR/LP3*  
423 requires Zinc ions to adopt their functional conformation (Dominguez and Carrari, 2015;  
424 González and Iusem, 2014). A lack of clear segregation between *ASR* and *LP3* can also be  
425 indicative of high purifying selective pressures thereby favouring a conserved nucleotide  
426 sequence. The lack of a definite separation between angiosperm and gymnosperm sequences is  
427 another argument in support of the essential and possibly similar role of the N-terminal domain  
428 in both clades.

429 C-tree, which focused on the putative NLS/DNA binding region of *ASR/LP3*, reveals similar  
430 topological properties as the N-tree but with a lower support to the branches discerning the  
431 different *ASR* gene family members. Both *ASR* and *LP3* encode relatively small proteins and  
432 in the case *ASR1* it has been previously shown that it does not require its putative NLS to enter  
433 the nucleus (Ricardi et al., 2012; Rom et al., 2006). This low level of divergence might indicate  
434 that the selective pressures focusing on these parts of the genes stem mostly from their role as  
435 transcription factors. Following this reasoning, it could be suggested that the sequence  
436 corresponding to *lp3-0-3 Picea abies* targets a different gene somewhere along the genome  
437 other than the *LP3* gene family.

438 In all cases, it was observed that the *LP3* genes had much lower divergence between them than  
439 the *ASR* genes. This is in line with previous research that found that coniferous genes have a

440 low divergence rate among themselves when compared with angiosperm (Buschiazzo et al.,  
441 2012). In addition to all the individual reasons listed previously, previous transcriptomic  
442 analyses of homologous genes have shown that angiosperm genes tend to diverge much more  
443 strongly than coniferous genes (Li et al., 2010). Our phylogenetic analyses are therefore in line  
444 with previous known research.

445

#### 446 ***4.2 Differences in GC1% and GC2% between genes, differences in CAI between species***

447 While no significant difference was observed in total GC or GC3 content between the  
448 ABA/WDS genes, there were differences in the GC1 and GC2 contents between genes. In all  
449 cases the GC2 was lower than both GC1 and GC3, a pattern which has been observed in other  
450 gene analyses (Song et al., 2017, 2018). In all the major species investigated, CAI was on  
451 average highest in *Oryza sativa*, which in turn can be used to predict that ABA/WDS expression  
452 levels are highest within *Oryza sativa* (Sharp and Li, 1987). Previous research on ASR  
453 expression in rice has shown that it responds strongly to drought stress (Pérez-Díaz et al., 2014),  
454 so this high CAI is further indicative of high expression, which in turn lends credence to the  
455 other average CAI of ABA/WDS of the other investigated species being indicative of gene  
456 expression. It was interesting to see variations in CAI levels between the coniferous species,  
457 especially between the *Picea* and *Pinus* genera, with *Pinus* species exhibiting higher CAI than  
458 *Picea* (except for *Picea sitchensis*). This in turn may be indicative that the ABA/WDS  
459 expression is higher in *Pinus* than in *Picea*, although a more thorough gene expression analysis  
460 within more species of each genus is required to confirm this hypothesis.

461 Previous gene studies have focused on the correlations of CAI with various other factors such  
462 as gene length, GC content and ENC (Gun et al., 2018; Song et al., 2017, 2018; Zhou and Li,  
463 2009). Our study however showed no significant correlation between sequence length and CAI.  
464 CAI is often correlated with GC3% yet this correlation was only significant when concerning  
465 ASR genes and not the LP3 genes. Instead CAI was positively correlated with GC1% in LP3,

466 which contrasts with previous gene studies (Gun et al., 2018; Song et al., 2017, 2018). Our  
467 study does reflect significant correlations between CAI and ENC within the ABA/WDS genes,  
468 indicative of a high translation efficiency found in many highly expressed genes (Sharp and Li,  
469 1987; Wright, 1990)

#### 470 ***4.3 ASR has a different codon usage than LP3***

471 Another factor that contributes to differentiate *ASR* and *LP3* gene families is the RSCU.  
472 Differences in codon usage were observed for several amino acids. Yet it was interesting to see  
473 that the amino acid with the highest codon bias was serine, although the individual codon with  
474 the highest bias was different among different genes. It has already been established that  
475 monocots and dicots differ in their codon usage for the homologous genes (Campbell and  
476 Gowri, 1990), therefore it is not improbable that gymnosperms would have different codon  
477 usages than angiosperms for homologous genes. Highly expressed genes have been shown to  
478 have both a more pronounced codon bias and higher overall GC content compared to lowly  
479 expressed genes (De La Torre et al., 2015; Song et al., 2017; Kuzniar et al., 2008), however no  
480 significant differences in overall average GC content between the ABA/WDS genes were  
481 observed in this study.

482 After gene duplication the original and new copies can go down multiple evolutionary paths  
483 (Innan, Kondrachov, 2011). While *LP3-3* and *LP3-0* genes have seemingly diverged recently  
484 they are affected by different modes of gene-duplication evolution. *LP3-3* presents signs of  
485 positive selection on three residues and the rest are evolving either under neutral or purifying  
486 selection, whereas *LP3-0* is only affected by purifying selection.

487 In *LP3-3* those three residues (mutation) may have introduced new beneficial functional  
488 aspects to the original *LP3* copy resulting in their fixation and maintenance through positive  
489 selection. This mode of gene-duplication evolution would suggest the acquisition of a novel  
490 function for *LP3-3* gene. Notably purifying selection is acting on Lysine (K), Histidine (H) and  
491 Glutamate (E). *LP3* and *ASR*, both belonging to the ABA/WDS gene family, are both highly



492 hydrophilic protein groups therefore the presence of charged, polar amino acids is important in  
493 attaining their functional conformations(González and Iusem, 2014; Rom et al., 2006).  
494 It has also been suggested that Zinc ions bind to lysine residues in the N-terminal region of both  
495 sets of genes, this binding being required for the proteins to finally obtain their functional  
496 conformation, thereby further explaining why mutations affecting Lysine are purified. Evidence  
497 of purifying selection can also be observed in both the ABA/WDS domain and C-terminal  
498 containing a putative NLS/DNA binding amino acid sequence, implying that both are important  
499 for the overall functioning of the genes. This is logical when considering that expressions of  
500 both *LP3* and *ASR* are upregulated in presence of ABA and that both act as transcription factors  
501 in response to water-deficit stress (Padmanabhan et al., 1997; Wang et al., 2002).

502

#### 503 ***4.4 Conclusion and future perspectives***

504 Overall, this study highly suggests that while *ASR* and *LP3* may have originated from the same  
505 common ancestor, they have undergone significant shifts in codon usage, maybe due to  
506 different evolutionary constraints. Different *ASR* genes have already been studied in depth, with  
507 *ASR1* being the most substantially studied of them. This is not the case for *LP3* for which more  
508 research opportunities are available. Further studies into *LP3* mutants could produce similar  
509 phenotypes as observed in *ASR* mutants. Precise functions and genomic targets of *LP3* could  
510 be hypothesized by homology with genes targeted by *ASR*. Precise mapping of the *LP3* genes  
511 onto the *Pinus taeda* genome should also be done. Further research could establish the presence  
512 of paralogous genes of *LP3* within *Pinus taeda* and their precise role in drought response. Since  
513 the responses of plants to cold stress are similar to their responses to drought stress, research  
514 into how *ASR* and *LP3* are affected in terms of expression and cellular function in conditions  
515 of cold stress would also be an interesting research objective. Finally, a precise expression  
516 network between *ASR/LP3* and downstream targets should be established since these have not  
517 yet been determined.



518 **Conflict of interest**

519 No conflicts of interest during the making of this study.

520

521 **Acknowledgments**

522 We would like to thank Nicolas Delhomme and Sonali Ranade for bioinformatic support. We

523 would like to acknowledge the UPSC Vinnova Center for Forest Biotechnology.

## 524 References

- 525 Altschul, S., 1997. Gapped BLAST and PSI-BLAST: a new generation of protein database  
526 search programs. *Nucleic Acids Res.* 25, 3389–3402.  
527 <https://doi.org/10.1093/nar/25.17.3389>
- 528 Bateman, A., Finn, R.D., 2007. SCOOP: a simple method for identification of novel protein  
529 superfamily relationships. *Bioinforma. Oxf. Engl.* 23, 809–814.  
530 <https://doi.org/10.1093/bioinformatics/btm034>
- 531 Boratyn, G.M., Camacho, C., Cooper, P.S., Coulouris, G., Fong, A., Ma, N., Madden, T.L.,  
532 Matten, W.T., McGinnis, S.D., Merezuk, Y., Raytselis, Y., Sayers, E.W., Tao, T.,  
533 Ye, J., Zaretskaya, I., 2013. BLAST: a more efficient report with usability  
534 improvements. *Nucleic Acids Res.* 41, W29–W33. <https://doi.org/10.1093/nar/gkt282>
- 535 Bray, E.A., 1993. Molecular Responses to Water Deficit. *Plant Physiol.* 103, 1035–1040.
- 536 Buschiazzo, E., Ritland, C., Bohlmann, J., Ritland, K., 2012. Slow but not low: genomic  
537 comparisons reveal slower evolutionary rate and higher dN/dS in conifers compared to  
538 angiosperms. *BMC Evol. Biol.* 12, 8. <https://doi.org/10.1186/1471-2148-12-8>
- 539 Campbell, W.H., Gowri, G., 1990. Codon Usage in Higher Plants, Green Algae, and  
540 Cyanobacteria. *PLANT Physiol.* 92, 1–11. <https://doi.org/10.1104/pp.92.1.1>
- 541 Chang, S., Puryear, J.D., Dias, M.A.D.L., Funkhouser, E.A., Newton, R.J., Cairney, J., 1996.  
542 Gene expression under water deficit in loblolly pine (*Pinus taeda*): Isolation and  
543 characterization of cDNA clones. *Physiol. Plant.* 97, 139–148.  
544 <https://doi.org/10.1111/j.1399-3054.1996.tb00490.x>
- 545 Chaves, M.M., Maroco, J.P., Pereira, J.S., 2003. Understanding plant responses to drought —  
546 from genes to the whole plant. *Funct. Plant Biol.* 30, 239–264.  
547 <https://doi.org/10.1071/fp02076>
- 548 De La Torre, A.R., Li, Z., Van de Peer, Y., Ingvarsson, P.K., 2017. Contrasting Rates of  
549 Molecular Evolution and Patterns of Selection among Gymnosperms and Flowering  
550 Plants. *Mol. Biol. Evol.* 34, 1363–1377. <https://doi.org/10.1093/molbev/msx069>
- 551 Dominguez, P.G., Carrari, F., 2015. ASR1 transcription factor and its role in metabolism.  
552 *Plant Signal. Behav.* 10, e992751. <https://doi.org/10.4161/15592324.2014.992751>
- 553 Edgar, R.C., 2004. MUSCLE: multiple sequence alignment with high accuracy and high  
554 throughput. *Nucleic Acids Res.* 32, 1792–1797. <https://doi.org/10.1093/nar/gkh340>
- 555 Edwards, D., Selden, P.A., 1992. The development of early terrestrial ecosystems. *Bot. J.*  
556 *Scotl.* 46, 337–366. <https://doi.org/10.1080/03746600508684794>
- 557 Frankel, N., Carrari, F., Hasson, E., Iusem, N.D., 2006. Evolutionary history of the Asr gene  
558 family. *Gene* 378, 74–83. <https://doi.org/10.1016/j.gene.2006.05.010>
- 559 Goldgur, Y., Rom, S., Ghirlando, R., Shkolnik, D., Shadrin, N., Konrad, Z., Bar-Zvi, D.,  
560 2007. Desiccation and Zinc Binding Induce Transition of Tomato Abscisic Acid Stress  
561 Ripening 1, a Water Stress- and Salt Stress-Regulated Plant-Specific Protein, from  
562 Unfolded to Folded State. *Plant Physiol.* 143, 617.  
563 <https://doi.org/10.1104/pp.106.092965>
- 564 González, R.M., Iusem, N.D., 2014. Twenty years of research on Asr (ABA-stress-ripening)  
565 genes and proteins. *Planta* 239, 941–949. <https://doi.org/10.1007/s00425-014-2039-9>
- 566 Gudmundsson, L., Seneviratne, S.I., 2016. Anthropogenic climate change affects  
567 meteorological drought risk in Europe. *Environ. Res. Lett.* 11, 044005.  
568 <https://doi.org/10.1088/1748-9326/11/4/044005>
- 569 Gun, L., Yumiao, R., Haixian, P., Liang, Z., 2018. Comprehensive Analysis and Comparison  
570 on the Codon Usage Pattern of Whole Mycobacterium tuberculosis Coding Genome  
571 from Different Area. *BioMed Res. Int.* 2018. <https://doi.org/10.1155/2018/3574976>

- 572 Hedges, S.B., Marin, J., Suleski, M., Paymer, M., Kumar, S., 2015. Tree of Life Reveals  
573 Clock-Like Speciation and Diversification. *Mol. Biol. Evol.* 32, 835–845.  
574 <https://doi.org/10.1093/molbev/msv037>
- 575 Iusem, N.D., Bartholomew, D.M., Hitz, W.D., Scolnik, P.A., 1993. Tomato (*Lycopersicon*  
576 *esculentum*) transcript induced by water deficit and ripening. *Plant Physiol.* 102,  
577 1353–1354.
- 578 Kumar, S., Stecher, G., Li, M., Knyaz, C., Tamura, K., 2018. MEGA X: Molecular  
579 Evolutionary Genetics Analysis across Computing Platforms. *Mol. Biol. Evol.* 35,  
580 1547–1549. <https://doi.org/10.1093/molbev/msy096>
- 581 Kumar, S., Stecher, G., Suleski, M., Hedges, S.B., 2017. TimeTree: A Resource for  
582 Timelines, Timetrees, and Divergence Times. *Mol. Biol. Evol.* 34, 1812–1819.  
583 <https://doi.org/10.1093/molbev/msx116>
- 584 Li, X., Wu, H.X., Southerton, S.G., 2010. Comparative genomics reveals conservative  
585 evolution of the xylem transcriptome in vascular plants. *BMC Evol. Biol.* 10, 190.  
586 <https://doi.org/10.1186/1471-2148-10-190>
- 587 Mistry, J., Bateman, A., Finn, R.D., 2007. Predicting active site residue annotations in the  
588 Pfam database. *BMC Bioinformatics* 8, 298. <https://doi.org/10.1186/1471-2105-8-298>
- 589 Padmanabhan, V., Dias, D.M.A.L., Newton, R.J., 1997. Expression analysis of a gene family  
590 in loblolly pine (*Pinus taeda* L.) induced by water deficit stress. *Plant Mol. Biol.* 35,  
591 801–807. <https://doi.org/10.1023/A:1005897921567>
- 592 Pérez-Díaz, J., Wu, T.-M., Pérez-Díaz, R., Ruíz-Lara, S., Hong, C.-Y., Casaretto, J.A., 2014.  
593 Organ- and stress-specific expression of the ASR genes in rice. *Plant Cell Rep.* 33,  
594 61–73. <https://doi.org/10.1007/s00299-013-1512-4>
- 595 Ricardi, M.M., Guaimas, F.F., González, R.M., Burrieza, H.P., López-Fernández, M.P., Jares-  
596 Erijman, E.A., Estévez, J.M., Iusem, N.D., 2012. Nuclear Import and Dimerization of  
597 Tomato ASR1, a Water Stress-Inducible Protein Exclusive to Plants. *PLoS ONE* 7,  
598 e41008. <https://doi.org/10.1371/journal.pone.0041008>
- 599 Rom, S., Gilad, A., Kalifa, Y., Konrad, Z., Karpasas, M.M., Goldgur, Y., Bar-Zvi, D., 2006.  
600 Mapping the DNA- and zinc-binding domains of ASR1 (abscisic acid stress ripening),  
601 an abiotic-stress regulated plant specific protein. *Biochimie* 88, 621–628.  
602 <https://doi.org/10.1016/j.biochi.2005.11.008>
- 603 Ruosteenoja, K., Markkanen, T., Venäläinen, A., Räisänen, P., Peltola, H., 2018. Seasonal  
604 soil moisture and drought occurrence in Europe in CMIP5 projections for the 21st  
605 century. *Clim. Dyn.* 50, 1177–1192. <https://doi.org/10.1007/s00382-017-3671-4>
- 606 Schaeffer, R.D., Liao, Y., Cheng, H., Grishin, N.V., 2017. ECOD: new developments in the  
607 evolutionary classification of domains. *Nucleic Acids Res.* 45, D296–D302.  
608 <https://doi.org/10.1093/nar/gkw1137>
- 609 Sharp, P.M., Li, W.H., 1987. The codon Adaptation Index--a measure of directional  
610 synonymous codon usage bias, and its potential applications. *Nucleic Acids Res.* 15,  
611 1281–1295.
- 612 Song, H., Gao, H., Liu, J., Tian, P., Nan, Z., 2017. Comprehensive analysis of correlations  
613 among codon usage bias, gene expression, and substitution rate in *Arachis duranensis*  
614 and *Arachis ipaënsis* orthologs. *Sci. Rep.* 7. <https://doi.org/10.1038/s41598-017-13981-1>
- 615  
616 Song, X., Ma, X., Li, C., Hu, J., Yang, Q., Wang, T., Wang, Li, Wang, J., Guo, D., Ge, W.,  
617 Wang, Z., Li, M., Wang, Q., Ren, T., Feng, S., Wang, Lixia, Zhang, W., Wang, X.,  
618 2018. Comprehensive analyses of the BES1 gene family in *Brassica napus* and  
619 examination of their evolutionary pattern in representative species. *BMC Genomics*  
620 19. <https://doi.org/10.1186/s12864-018-4744-4>

- 621 Stern, A., Doron-Faigenboim, A., Erez, E., Martz, E., Bacharach, E., Pupko, T., 2007.  
622 Selecton 2007: advanced models for detecting positive and purifying selection using a  
623 Bayesian inference approach. *Nucleic Acids Res.* 35, W506–W511.  
624 <https://doi.org/10.1093/nar/gkm382>
- 625 Wang, J.-T., Gould, J.H., Padmanabhan, V., Newton, R.J., 2002. Analysis And Localization  
626 of the Water-Deficit Stress-Induced Gene (Ip3). *J. Plant Growth Regul.* 21, 469–478.  
627 <https://doi.org/10.1007/s00344-002-0128-7>
- 628 Wright, F., 1990. The “effective number of codons” used in a gene. *Gene* 87, 23–29.  
629 [https://doi.org/10.1016/0378-1119\(90\)90491-9](https://doi.org/10.1016/0378-1119(90)90491-9)
- 630 Yang, C.-Y., Chen, Y.-C., Jauh, G.Y., Wang, C.-S., 2005. A Lily ASR Protein Involves  
631 Abscisic Acid Signaling and Confers Drought and Salt Resistance in Arabidopsis.  
632 *Plant Physiol.* 139, 836–846. <https://doi.org/10.1104/pp.105.065458>
- 633 Zhou, M., Li, X., 2009. Analysis of synonymous codon usage patterns in different plant  
634 mitochondrial genomes. *Mol. Biol. Rep.* 36, 2039–2046.  
635 <https://doi.org/10.1007/s11033-008-9414-1>  
636
- 637

| Species                                  | Sequence name                             | Accession number                             |
|------------------------------------------|-------------------------------------------|----------------------------------------------|
| <i>Pinus taeda</i> L.                    | <i>LP3-0-1; LP3-0-2; LP3-0-3; LP3-1;</i>  | U67135; PITA_00002958;                       |
|                                          | <i>LP3-2; LP3-3</i>                       | PITA_00009264; U52865;<br>U59451; U59424     |
| <i>Pinus pinaster</i> Ait.               | <i>LP3-0-1; LP3-0-2; LP3-0-3; LP3-03;</i> | PPI00000827; PPI00033797;                    |
|                                          | <i>LP3-0-4; LP3-0-5; LP3-0-6; LP3-0-</i>  | PPI00061525; PPI00057047;                    |
|                                          | <i>7;</i>                                 | PPI00018463; PPI00045720;                    |
|                                          | <i>LP3-1; LP3-3</i>                       | PPI00057443; HM483166;<br>HM483350           |
| <i>Pinus sylvestris</i> L.               | <i>LP3-0-1; LP3-0-2; LP3-0-3; LP3-03;</i> | PSY00000189; PSY00033385;                    |
|                                          | <i>LP3-0-4; LP3-0-5; LP3-1; LP3-2;</i>    | PSY00014816; PSY00003359;                    |
|                                          | <i>LP3-3;</i>                             | PSY00030448; GQ262453;<br>FJ201639; HQ110044 |
| <i>Picea abies</i> L.                    | <i>LP3-0-1; LP3-0-2; LP3-0-3; LP3-0-</i>  | MA_60383g0010;                               |
|                                          | <i>4; LP3-1</i>                           | MA_10429943g0;                               |
|                                          |                                           | MA_785227g001;                               |
|                                          |                                           | MA_470517g001;                               |
|                                          |                                           | MA_45729g0010                                |
| <i>Picea glauca</i> (Moench)<br>Voss     | <i>LP3-0-1; LP3-0-2; LP3-0-3; LP3-03;</i> | PGL00016950; PGL00010547;                    |
|                                          | <i>LP3-0-4; LP3-0-5</i>                   | PGL00013943; PGL00026768;<br>PGL00017146     |
|                                          |                                           |                                              |
| <i>Picea sitchensis</i> (Bong.)<br>Carr. | <i>LP3-0-1; LP3-0-2; LP3-0-3; LP3-03;</i> | PSI00017214; PSI00001767;                    |
|                                          | <i>LP3-0-4; LP3-0-5</i>                   | PSI00009226; PSI00001649;<br>PSI00017214     |
| <i>Cupressus sempervirens</i>            | <i>LP3-0-1</i>                            | FJ237438                                     |

L.

|                                                     |                                                |
|-----------------------------------------------------|------------------------------------------------|
| <i>Pseudostuga menziesii</i> LP3-0-1                | PME00010941                                    |
| (Mirb.) Franco                                      |                                                |
| <i>Pinus halepensis</i> Miller LP3-1; LP3-3         | HM482200; HM482279                             |
| <i>Pinus hwangshanensis</i> LP3-1                   | KJ921435                                       |
| W.Y.Hsia                                            |                                                |
| <i>Pinus massoniana</i> Lamb. LP3-1                 | KJ921431                                       |
| <i>Pinus echinata</i> Miller LP3-3                  | KF158939                                       |
| <i>Pinus canariensis</i> C.Sm. LP3-3                | KF046212                                       |
| <i>Pinus mugo</i> Turra LP3-3                       | JQ028052                                       |
| <i>Solanum lycopersicum</i> L. ASR1, ASR2, ASR3     | NM_001247208;<br>NM_001320991;<br>NM_001309371 |
| <i>Lycopersicon chilense</i> ASR1, ASR2, ASR3       | DQ058748; AY217009;                            |
| (Dunal) Reiche                                      | DQ058754                                       |
| <i>Lycopersicon esculentum</i> ASR1, ASR2, ASR3     | DQ058745; AY217012;                            |
| Mill.                                               | DQ058750                                       |
| <i>Solanum tuberosum</i> L. ASR1, ASR2, ASR4, ci21B | DQ252504; XM_006359742;<br>JX576284; U76611    |
| <i>Oryza sativa</i> L. ASR1                         | XM_015767744;                                  |
| <i>Amborella trichopoda</i> ASR1                    | XM_006851361                                   |
| Baill.                                              |                                                |
| <i>Vitis vinifera</i> L. ASR2                       | AF281656                                       |
| <i>Populus trichocarpa</i> Torr ASR3                | XM_024602314                                   |
| & A.Gray ex.Hook                                    |                                                |

|                             |      |              |
|-----------------------------|------|--------------|
| <i>Zea mays</i> L.          | ASR3 | XM_008647554 |
| <i>Nicotiana tabacum</i> L. | TIP  | HE664126     |

*Supplementary Table 1: Sequence names and accession numbers used in phylogenetic tree reconstruction according to species.*

| Species                           | Gene name                                                                                                                | Accession numbers                                                                                                         |
|-----------------------------------|--------------------------------------------------------------------------------------------------------------------------|---------------------------------------------------------------------------------------------------------------------------|
| <i>Pinus taeda</i> L.             | <i>LP3-0-1; LP3-0-2; LP3-0-3;</i><br><i>LP3-1; LP3-2; LP3-3</i>                                                          | U67135; PITA_00002958;<br>PITA_00009264; U52865;<br>U59451;<br>U59424                                                     |
| <i>Pinus pinaster</i> Ait.        | <i>LP3-0-1; LP3-0-2; LP3-0-3;</i><br><i>LP3-03; LP3-0-4; LP3-0-5;</i><br><i>LP3-0-6; LP3-0-7;</i><br><i>LP3-1; LP3-3</i> | PPI00000827; PPI00033797;<br>PPI00061525; PPI00057047;<br>PPI00018463; PPI00045720;<br>PPI00057443; HM483166;<br>HM483350 |
| <i>Pinus sylvestris</i> L.        | <i>LP3-0-1; LP3-0-2; LP3-0-3;</i><br><i>LP3-03; LP3-0-4; LP3-0-5;</i><br><i>LP3-1; LP3-2; LP3-3;</i>                     | PSY00000189; PSY00033385;<br>PSY00014816; PSY00003359;<br>PSY00030448; GQ262453;<br>FJ201639; HQ110044                    |
| <i>Picea abies</i> L.             | <i>LP3-0-1; LP3-0-2; LP3-0-3;</i><br><i>LP3-0-4; LP3-1</i>                                                               | MA_60383g0010;<br>MA_10429943g0;<br>MA_785227g001;<br>MA_470517g001;<br>MA_45729g0010                                     |
| <i>Picea glauca</i> (Moench) Voss | <i>LP3-0-1; LP3-0-2; LP3-0-3;</i><br><i>LP3-03; LP3-0-4; LP3-0-5</i>                                                     | PGL00016950; PGL00010547;<br>PGL00013943; PGL00026768;                                                                    |

|                                                  |                            |  |  |  |                           |
|--------------------------------------------------|----------------------------|--|--|--|---------------------------|
|                                                  |                            |  |  |  | PGL00017146               |
| <i>Picea sitchensis</i> (Bong.) Carr.            | LP3-0-1; LP3-0-2; LP3-0-3; |  |  |  | PSI00017214; PSI00001767; |
|                                                  | LP3-03; LP3-0-4; LP3-0-5   |  |  |  | PSI00009226; PSI00001649; |
|                                                  |                            |  |  |  | PSI00017214               |
| <i>Solanum lycopersicum</i> L.                   | ASR1, ASR2, ASR3, ASR4     |  |  |  | NM_001247208;             |
|                                                  |                            |  |  |  | NM_001320991;             |
|                                                  |                            |  |  |  | NM_001309371;             |
|                                                  |                            |  |  |  | NM_001282319              |
| <i>Solanum tuberosum</i> L.                      | ASR1, ASR2, ASR4, ci21A,   |  |  |  | DQ252504; XM_006359742;   |
|                                                  | ci21B                      |  |  |  | JX576284; U76610; U76611  |
| <i>Populus trichocarpa</i> Torr & A.Gray ex.Hook | ASR3, ASR2, ASR4           |  |  |  | XM_024602314;             |
|                                                  |                            |  |  |  | Potri.005G193800;         |
|                                                  |                            |  |  |  | Potri.005G193900          |
| <i>Zea mays</i> L.                               | ASR1, ASR2, ASR3           |  |  |  | EU963502; XM_008677645;   |
|                                                  |                            |  |  |  | XM_008647554              |
| <i>Oryza sativa</i> L.                           | ASR1, ASR2, ASR3           |  |  |  | XM_015767744;             |
|                                                  |                            |  |  |  | XM_015779843;             |
|                                                  |                            |  |  |  | XM_015794522              |

Supplementary Table 2: Sequence names and accession numbers from majorly represented species (i.e. species in which three or more ABA/WDS were found) for determining CAI, GC content, ENC and RSCU according to species.

| AA  | Codon          | RSCU        | Codon          | RSCU        | Codon          | RSCU        | Codon          | RSCU     |
|-----|----------------|-------------|----------------|-------------|----------------|-------------|----------------|----------|
|     | ASR1           |             | ASR2           |             | ASR3           |             | ASR4           |          |
| Ala | Ala_GCU        | 1,01        | Ala_GCU        | 1,9         | <b>Ala_GCU</b> | <b>1,49</b> | <b>Ala_GCU</b> | <b>2</b> |
|     | Ala_GCA        | 1,17        | <b>Ala_GCA</b> | <b>1,27</b> | Ala_GCA        | 1,21        | Ala_GCA        | 1,44     |
|     | <b>Ala_GCC</b> | <b>1,33</b> | Ala_GCC        | 0,73        | Ala_GCC        | 0,88        | Ala_GCC        | 0,48     |



|     |                |             |                |             |                |             |                |             |
|-----|----------------|-------------|----------------|-------------|----------------|-------------|----------------|-------------|
| Arg | Ala_GCG        | 0,48        | Ala_GCG        | 0,1         | Ala_GCG        | 0,42        | Ala_GCG        | 0,08        |
|     | Arg_CGU        | 0           | Arg_CGU        | 0           | <b>Arg_CGU</b> | <b>1,5</b>  | Arg_CGU        | 0           |
|     | Arg_CGA        | 0           | Arg_CGA        | 0           | Arg_CGA        | 1           | <b>Arg_CGA</b> | <b>2,12</b> |
|     | Arg_AGA        | 0           | Arg_AGA        | 0           | <b>Arg_AGA</b> | <b>1,5</b>  | Arg_AGA        | 1,76        |
|     | Arg_CGC        | 0           | Arg_CGC        | 0           | <b>Arg_CGC</b> | <b>1,5</b>  | Arg_CGC        | 0,35        |
|     | Arg_CGG        | 0           | Arg_CGG        | 0           | Arg_CGG        | 0           | Arg_CGG        | 0           |
|     | Arg_AGG        | 0           | <b>Arg_AGG</b> | <b>6</b>    | Arg_AGG        | 0,5         | Arg_AGG        | 1,76        |
| Asn | Asn_AAU        | 0           | Asn_AAU        | 0,57        | Asn_AAU        | 0,89        | <b>Asn_AAU</b> | <b>1,22</b> |
|     | <b>Asn_AAC</b> | <b>2</b>    | <b>Asn_AAC</b> | <b>1,43</b> | <b>Asn_AAC</b> | <b>1,11</b> | Asn_AAC        | 0,78        |
| Asp | Asp_GAU        | 0,83        | <b>Asp_GAU</b> | <b>1,07</b> | Asp_GAU        | 0,82        | <b>Asp_GAU</b> | <b>1,33</b> |
|     | <b>Asp_GAC</b> | <b>1,17</b> | Asp_GAC        | 0,93        | <b>Asp_GAC</b> | <b>1,18</b> | Asp_GAC        | 0,67        |
| Cys | Cys_UGU        | 0           | Cys_UGU        | 0           | <b>Cys_UGU</b> | <b>2</b>    | <b>Cys_UGU</b> | <b>1,2</b>  |
|     | Cys_UGC        | 0           | Cys_UGC        | 0           | Cys_UGC        | 0           | Cys_UGC        | 0,8         |
| Gln | <b>Gln_CAA</b> | <b>1,56</b> | Gln_CAA        | 0,86        | Gln_CAA        | 0,78        | Gln_CAA        | 0,86        |
|     | Gln_CAG        | 0,44        | <b>Gln_CAG</b> | <b>1,14</b> | <b>Gln_CAG</b> | <b>1,22</b> | <b>Gln_CAG</b> | <b>1,14</b> |
| Glu | Glu_GAA        | 0,5         | Glu_GAA        | 0,91        | Glu_GAA        | 0,61        | Glu_GAA        | 0,87        |
|     | <b>Glu_GAG</b> | <b>1,5</b>  | <b>Glu_GAG</b> | <b>1,09</b> | <b>Glu_GAG</b> | <b>1,39</b> | <b>Glu_GAG</b> | <b>1,13</b> |
| Gly | Gly_GGU        | 1,14        | <b>Gly_GGU</b> | <b>2</b>    | <b>Gly_GGU</b> | <b>2,12</b> | <b>Gly_GGU</b> | <b>1,85</b> |
|     | Gly_GGA        | 0,79        | Gly_GGA        | 1,33        | Gly_GGA        | 0,82        | Gly_GGA        | 1,48        |
|     | <b>Gly_GGC</b> | <b>1,21</b> | Gly_GGC        | 0,33        | Gly_GGC        | 0,82        | Gly_GGC        | 0,37        |
|     | Gly_GGG        | 0,86        | Gly_GGG        | 0,33        | Gly_GGG        | 0,24        | Gly_GGG        | 0,31        |
| His | His_CAU        | 0,66        | His_CAU        | 0,68        | His_CAU        | 0,76        | <b>His_CAU</b> | <b>1</b>    |
|     | <b>His_CAC</b> | <b>1,34</b> | <b>His_CAC</b> | <b>1,32</b> | <b>His_CAC</b> | <b>1,24</b> | <b>His_CAC</b> | <b>1</b>    |
| Ile | Ile_AUU        | 0,35        | <b>Ile_AUU</b> | <b>1,71</b> | Ile_AUU        | 1,15        | Ile_AUU        | 1,4         |
|     | Ile_AUA        | 1,24        | Ile_AUA        | 1,07        | <b>Ile_AUA</b> | <b>1,62</b> | <b>Ile_AUA</b> | <b>1,6</b>  |
|     | <b>Ile_AUC</b> | <b>1,41</b> | Ile_AUC        | 0,21        | Ile_AUC        | 0,23        | Ile_AUC        | 0           |
| Leu | Leu_UUA        | 0           | Leu_UUA        | 0,96        | Leu_UUA        | 0           | Leu_UUA        | 1,04        |
|     | Leu_CUU        | 1,31        | Leu_CUU        | 0,96        | Leu_CUU        | 1,5         | <b>Leu_CUU</b> | <b>2,09</b> |
|     | Leu_CUA        | 0           | Leu_CUA        | 0           | Leu_CUA        | 0           | Leu_CUA        | 0,26        |
|     | Leu_UUG        | 0,75        | Leu_UUG        | 1,92        | <b>Leu_UUG</b> | <b>1,8</b>  | Leu_UUG        | 1,04        |
|     | <b>Leu_CUC</b> | <b>2,63</b> | <b>Leu_CUC</b> | <b>2,16</b> | <b>Leu_CUC</b> | <b>1,8</b>  | Leu_CUC        | 1,3         |
|     | Leu_CUG        | 1,31        | Leu_CUG        | 0           | Leu_CUG        | 0,9         | Leu_CUG        | 0,26        |
| Lys | <b>Lys_AAA</b> | <b>1,02</b> | Lys_AAA        | 0,75        | Lys_AAA        | 0,85        | Lys_AAA        | 0,91        |
|     | Lys_AAG        | 0,98        | <b>Lys_AAG</b> | <b>1,25</b> | <b>Lys_AAG</b> | <b>1,15</b> | <b>Lys_AAG</b> | <b>1,09</b> |
| Phe | Phe_UUU        | 0,36        | Phe_UUU        | 0,59        | Phe_UUU        | 0,59        | <b>Phe_UUU</b> | <b>1,1</b>  |
|     | <b>Phe_UUC</b> | <b>1,64</b> | <b>Phe_UUC</b> | <b>1,41</b> | <b>Phe_UUC</b> | <b>1,41</b> | Phe_UUC        | 0,9         |
| Pro | Pro_CCU        | 0           | Pro_CCU        | 0,92        | Pro_CCU        | 0,62        | Pro_CCU        | 1           |
|     | <b>Pro_CCA</b> | <b>2,18</b> | <b>Pro_CCA</b> | <b>2,77</b> | <b>Pro_CCA</b> | <b>3,08</b> | <b>Pro_CCA</b> | <b>2</b>    |
|     | Pro_CCC        | 1,45        | Pro_CCC        | 0,31        | Pro_CCC        | 0,31        | Pro_CCC        | 0,5         |
|     | Pro_CCG        | 0,36        | Pro_CCG        | 0           | Pro_CCG        | 0           | Pro_CCG        | 0,5         |
| Ser | <b>Ser_UCU</b> | <b>1,5</b>  | Ser_UCU        | 0,46        | Ser_UCU        | 0,55        | Ser_UCU        | 1,4         |
|     | Ser_UCA        | 0           | Ser_UCA        | 0           | Ser_UCA        | 1,09        | Ser_UCA        | 0,6         |
|     | Ser_AGU        | 0           | Ser_AGU        | 0           | Ser_AGU        | 0           | <b>Ser_AGU</b> | <b>2,8</b>  |

|     |                |             |                |             |                |             |                |             |
|-----|----------------|-------------|----------------|-------------|----------------|-------------|----------------|-------------|
| Thr | <b>Ser_UCC</b> | <b>1,5</b>  | Ser_UCC        | 1,85        | Ser_UCC        | 1,09        | Ser_UCC        | 0,2         |
|     | <b>Ser_UCG</b> | <b>1,5</b>  | Ser_UCG        | 0,92        | Ser_UCG        | 0           | Ser_UCG        | 0           |
|     | <b>Ser_AGC</b> | <b>1,5</b>  | <b>Ser_AGC</b> | <b>2,77</b> | <b>Ser_AGC</b> | <b>3,27</b> | Ser_AGC        | 1           |
|     | <b>Thr_ACU</b> | <b>2,57</b> | Thr_ACU        | 0           | <b>Thr_ACU</b> | <b>1,6</b>  | <b>Thr_ACU</b> | <b>1,57</b> |
|     | Thr_ACA        | 0,57        | Thr_ACA        | 0           | Thr_ACA        | 0,8         | Thr_ACA        | 1,41        |
|     | Thr_ACC        | 0,57        | <b>Thr_ACC</b> | <b>4</b>    | <b>Thr_ACC</b> | <b>1,6</b>  | Thr_ACC        | 1,02        |
|     | Thr_ACG        | 0,29        | Thr_ACG        | 0           | Thr_ACG        | 0           | Thr_ACG        | 0           |
| Tyr | Tyr_UAU        | 0,33        | Tyr_UAU        | 0,67        | Tyr_UAU        | 0,44        | <b>Tyr_UAU</b> | <b>1,7</b>  |
|     | <b>Tyr_UAC</b> | <b>1,67</b> | <b>Tyr_UAC</b> | <b>1,33</b> | <b>Tyr_UAC</b> | <b>1,56</b> | Tyr_UAC        | 0,3         |
| Val | <b>Val_GUU</b> | <b>1,23</b> | <b>Val_GUU</b> | <b>2,76</b> | <b>Val_GUU</b> | <b>1,92</b> | <b>Val_GUU</b> | <b>1,8</b>  |
|     | Val_GUA        | 0,31        | Val_GUA        | 0,14        | Val_GUA        | 0,8         | Val_GUA        | 0,6         |
|     | Val_GUC        | 0,77        | Val_GUC        | 0,28        | Val_GUC        | 0,32        | Val_GUC        | 0,8         |
|     | Val_GUG        | 1,69        | Val_GUG        | 0,83        | Val_GUG        | 0,96        | Val_GUG        | 0,8         |

| AA | Codon | RSCU | Codon | RSCU | Codon | RSCU | Codon | RSCU |
|----|-------|------|-------|------|-------|------|-------|------|
|----|-------|------|-------|------|-------|------|-------|------|

|     | LP3-0          |             | LP3-1          |                | LP3-2          |                | LP3-3          |                |
|-----|----------------|-------------|----------------|----------------|----------------|----------------|----------------|----------------|
| Ala | <b>Ala_GCU</b> | <b>1,53</b> | Ala_GCU        | 0,94           | Ala_GCU        | 1,28           | Ala_GCU        | 1,35           |
|     | Ala_GCA        | 1,48        | <b>Ala_GCA</b> | <b>2,25</b>    | <b>Ala_GCA</b> | <b>2,08</b>    | <b>Ala_GCA</b> | <b>1,67</b>    |
|     | Ala_GCC        | 0,47        | Ala_GCC        | 0,58           | Ala_GCC        | 0,64           | Ala_GCC        | 0,7            |
|     | Ala_GCG        | 0,52        | Ala_GCG        | 0,22           | Ala_GCG        | 0              | Ala_GCG        | 0,28           |
| Arg | Arg_CGU        | 0,18        | Arg_CGU        | 0,75           | <b>Arg_CGU</b> | <b>3,6</b>     | Arg_CGU        | 0              |
|     | Arg_CGA        | 0,09        | Arg_CGA        | 0,75           | Arg_CGA        | 0              | Arg_CGA        | 0              |
|     | Arg_AGA        | 0,88        | Arg_AGA        | 1,5            | Arg_AGA        | 0              | Arg_AGA        | 0              |
|     | Arg_CGC        | 0,79        | Arg_CGC        | 0              | Arg_CGC        | 0              | Arg_CGC        | 0              |
|     | Arg_CGG        | 0,35        | Arg_CGG        | 0              | Arg_CGG        | 0              | Arg_CGG        | 0              |
|     | <b>Arg_AGG</b> | <b>3,71</b> | <b>Arg_AGG</b> | <b>3</b>       | Arg_AGG        | 2,4            | <b>Arg_AGG</b> | <b>6</b>       |
|     | Asn            | Asn_AAU     | 0,69           | <b>Asn_AAU</b> | <b>1,14</b>    | <b>Asn_AAU</b> | <b>2</b>       | <b>Asn_AAU</b> |
|     | <b>Asn_AAC</b> | <b>1,31</b> | Asn_AAC        | 0,86           | Asn_AAC        | 0              | Asn_AAC        | 0,67           |
| Asp | <b>Asp_GAU</b> | <b>1,75</b> | <b>Asp_GAU</b> | <b>1,91</b>    | <b>Asp_GAU</b> | <b>1,6</b>     | <b>Asp_GAU</b> | <b>1,94</b>    |
|     | Asp_GAC        | 0,25        | Asp_GAC        | 0,09           | Asp_GAC        | 0,4            | Asp_GAC        | 0,06           |
| Cys | Cys_UGU        | 0,89        | Cys_UGU        | 0              | Cys_UGU        | 0              | Cys_UGU        | 0              |
|     | <b>Cys_UGC</b> | <b>1,11</b> | Cys_UGC        | 0              | Cys_UGC        | 0              | Cys_UGC        | 0              |
| Gln | Gln_CAA        | 0,8         | Gln_CAA        | 0,25           | Gln_CAA        | 0              | <b>Gln_CAA</b> | <b>2</b>       |
|     | <b>Gln_CAG</b> | <b>1,2</b>  | <b>Gln_CAG</b> | <b>1,75</b>    | Gln_CAG        | 0              | Gln_CAG        | 0              |

|     |                |             |                |             |                |             |                |             |
|-----|----------------|-------------|----------------|-------------|----------------|-------------|----------------|-------------|
| Glu | Glu_GAA        | 0,74        | Glu_GAA        | 0,64        | Glu_GAA        | 0,7         | Glu_GAA        | 0,51        |
|     | <b>Glu_GAG</b> | <b>1,26</b> | <b>Glu_GAG</b> | <b>1,36</b> | <b>Glu_GAG</b> | <b>1,3</b>  | <b>Glu_GAG</b> | <b>1,49</b> |
| Gly | Gly_GGU        | 1,24        | Gly_GGU        | 1,17        | <b>Gly_GGU</b> | <b>1,2</b>  | Gly_GGU        | 0,74        |
|     | <b>Gly_GGA</b> | <b>1,41</b> | <b>Gly_GGA</b> | <b>1,25</b> | <b>Gly_GGA</b> | <b>1,2</b>  | <b>Gly_GGA</b> | <b>2,05</b> |
|     | Gly_GGC        | 0,62        | Gly_GGC        | 0,83        | Gly_GGC        | 0,8         | Gly_GGC        | 0,65        |
| His | Gly_GGG        | 0,73        | Gly_GGG        | 0,75        | Gly_GGG        | 0,8         | Gly_GGG        | 0,56        |
|     | His_CAU        | 0,65        | His_CAU        | 0,55        | His_CAU        | 0,57        | His_CAU        | 0,65        |
|     | <b>His_CAC</b> | <b>1,35</b> | <b>His_CAC</b> | <b>1,45</b> | <b>His_CAC</b> | <b>1,43</b> | <b>His_CAC</b> | <b>1,35</b> |
| Ile | <b>Ile_AUU</b> | <b>1,53</b> | <b>Ile_AUU</b> | <b>2,73</b> | Ile_AUU        | 0           | <b>Ile_AUU</b> | <b>1,88</b> |
|     | Ile_AUA        | 0,12        | Ile_AUA        | 0           | Ile_AUA        | 0           | Ile_AUA        | 0           |
|     | Ile_AUC        | 1,35        | Ile_AUC        | 0,27        | <b>Ile_AUC</b> | <b>3</b>    | Ile_AUC        | 1,13        |
| Leu | Leu_UUA        | 0,17        | Leu_UUA        | 0,38        | <b>Leu_UUA</b> | <b>2,67</b> | Leu_UUA        | 0           |
|     | Leu_CUU        | 0,21        | Leu_CUU        | 0           | Leu_CUU        | 0           | Leu_CUU        | 0,26        |
|     | Leu_CUA        | 0,21        | Leu_CUA        | 0           | Leu_CUA        | 0,67        | Leu_CUA        | 0           |
|     | Leu_UUG        | 1,56        | Leu_UUG        | 0           | Leu_UUG        | 0           | Leu_UUG        | 1,3         |
|     | Leu_CUC        | 1,42        | Leu_CUC        | 1,88        | Leu_CUC        | 0,67        | Leu_CUC        | 1,83        |
|     | <b>Leu_CUG</b> | <b>2,43</b> | <b>Leu_CUG</b> | <b>3,75</b> | Leu_CUG        | 2           | <b>Leu_CUG</b> | <b>2,61</b> |
| Lys | Lys_AAA        | 0,4         | Lys_AAA        | 0,48        | Lys_AAA        | 0,67        | Lys_AAA        | 0,03        |
|     | <b>Lys_AAG</b> | <b>1,6</b>  | <b>Lys_AAG</b> | <b>1,52</b> | <b>Lys_AAG</b> | <b>1,33</b> | <b>Lys_AAG</b> | <b>1,97</b> |
| Phe | Phe_UUU        | 0,72        | Phe_UUU        | 0,5         | <b>Phe_UUU</b> | <b>1,33</b> | <b>Phe_UUU</b> | <b>2</b>    |
|     | <b>Phe_UUC</b> | <b>1,28</b> | <b>Phe_UUC</b> | <b>1,5</b>  | Phe_UUC        | 0,67        | Phe_UUC        | 0           |
| Pro | Pro_CCU        | 0,68        | Pro_CCU        | 0           | Pro_CCU        | 0           | Pro_CCU        | 1,14        |
|     | <b>Pro_CCA</b> | <b>1,66</b> | <b>Pro_CCA</b> | <b>3,5</b>  | <b>Pro_CCA</b> | <b>4</b>    | <b>Pro_CCA</b> | <b>2</b>    |
|     | Pro_CCC        | 1,56        | Pro_CCC        | 0           | Pro_CCC        | 0           | Pro_CCC        | 0,86        |
|     | Pro_CCG        | 0,1         | Pro_CCG        | 0,5         | Pro_CCG        | 0           | Pro_CCG        | 0           |
| Ser | <b>Ser_UCU</b> | <b>2,39</b> | Ser_UCU        | 0,43        | <b>Ser_UCU</b> | <b>3</b>    | <b>Ser_UCU</b> | <b>2,1</b>  |
|     | Ser_UCA        | 0,4         | Ser_UCA        | 0           | Ser_UCA        | 0           | Ser_UCA        | 0           |
|     | Ser_AGU        | 0,34        | Ser_AGU        | 0           | Ser_AGU        | 0           | Ser_AGU        | 0,6         |

|     |                |             |                |             |                |             |                |             |
|-----|----------------|-------------|----------------|-------------|----------------|-------------|----------------|-------------|
|     | Ser_UCC        | 0,25        | Ser_UCC        | 0           | Ser_UCC        | 0           | Ser_UCC        | 0           |
|     | Ser_UCG        | 1,34        | <b>Ser_UCG</b> | <b>3,86</b> | Ser_UCG        | 0           | Ser_UCG        | 1,2         |
|     | Ser_AGC        | 1,27        | Ser_AGC        | 1,71        | Ser_AGC        | 3           | Ser_AGC        | 2,1         |
| Thr | Thr_ACU        | 0,63        | Thr_ACU        | 1,2         | Thr_ACU        | 0           | Thr_ACU        | 1,29        |
|     | <b>Thr_ACA</b> | <b>1,6</b>  | <b>Thr_ACA</b> | <b>1,6</b>  | Thr_ACA        | 0           | Thr_ACA        | 0,57        |
|     | Thr_ACC        | 1,47        | Thr_ACC        | 0,4         | Thr_ACC        | 1,33        | <b>Thr_ACC</b> | <b>2,14</b> |
|     | Thr_ACG        | 0,3         | Thr_ACG        | 0,8         | <b>Thr_ACG</b> | <b>2,67</b> | Thr_ACG        | 0           |
| Tyr | Tyr_UAU        | 0,79        | <b>Tyr_UAU</b> | <b>1,07</b> | Tyr_UAU        | 0           | Tyr_UAU        | 0,78        |
|     | <b>Tyr_UAC</b> | <b>1,21</b> | Tyr_UAC        | 0,93        | <b>Tyr_UAC</b> | <b>2</b>    | <b>Tyr_UAC</b> | <b>1,22</b> |
| Val | Val_GUU        | 1,32        | Val_GUU        | 1,21        | <b>Val_GUU</b> | <b>1,82</b> | Val_GUU        | 1,14        |
|     | Val_GUA        | 0,03        | Val_GUA        | 0,48        | Val_GUA        | 0           | Val_GUA        | 0           |
|     | Val_GUC        | 0,44        | Val_GUC        | 0,24        | Val_GUC        | 0,73        | Val_GUC        | 0           |
|     | <b>Val_GUG</b> | <b>2,21</b> | <b>Val_GUG</b> | <b>2,06</b> | Val_GUG        | 1,45        | <b>Val_GUG</b> | <b>2,86</b> |

Supplementary Table 3: Average RSCU value of each codon per ABA/WDS gene. The most used codon for a given amino acid is indicated in bold.

(a) LP3-0

Selecton Bayesian Ka/Ks Results  
 Displayed on sequence 1

| POS | AMINO | Ka/Ks | [Confidence Interval]( * if lower bound > 1) | POSTERIOR PROBABILITIES |         |         |         |         |         |         |       |        |
|-----|-------|-------|----------------------------------------------|-------------------------|---------|---------|---------|---------|---------|---------|-------|--------|
|     |       |       |                                              | w =                     | 1.8e-05 | 0.00052 | 0.0034  | 0.012   | 0.033   | 0.076   | 0.16  | 0.41   |
| 1   | M     | 0.063 | [1.8e-05, 0.41]                              | 0.16                    | 0.16    | 0.15    | 0.15    | 0.14    | 0.12    | 0.081   | 0.032 | 0.021  |
| 2   | S     | 0.19  | [1.8e-05, 1]                                 | 0.12                    | 0.12    | 0.12    | 0.12    | 0.12    | 0.11    | 0.093   | 0.062 | 0.13   |
| 3   | E     | 0.043 | [1.8e-05, 0.41]                              | 0.17                    | 0.17    | 0.17    | 0.16    | 0.14    | 0.1     | 0.057   | 0.016 | 0.012  |
| 4   | E     | 0.055 | [1.8e-05, 0.41]                              | 0.17                    | 0.17    | 0.16    | 0.15    | 0.14    | 0.11    | 0.066   | 0.022 | 0.02   |
| 5   | K     | 0.93  | [0.41, 1]                                    | 4.2e-14                 | 1e-09   | 2.7e-07 | 1.3e-05 | 0.00023 | 0.0023  | 0.016   | 0.095 | 0.89   |
| 6   | H     | 0.87  | [0.16, 1]                                    | 1.2e-09                 | 9.6e-07 | 4e-05   | 0.00051 | 0.0034  | 0.015   | 0.05    | 0.13  | 0.8    |
| 7   | H     | 0.79  | [0.076, 1]                                   | 2.4e-09                 | 2e-06   | 8.2e-05 | 0.001   | 0.0068  | 0.029   | 0.089   | 0.18  | 0.69   |
| 8   | H     | 0.056 | [1.8e-05, 0.41]                              | 0.16                    | 0.16    | 0.16    | 0.15    | 0.14    | 0.11    | 0.074   | 0.026 | 0.018  |
| 9   | H     | 0.87  | [0.16, 1]                                    | 9.5e-10                 | 7.8e-07 | 3.3e-05 | 0.00042 | 0.0028  | 0.013   | 0.046   | 0.13  | 0.81   |
| 10  | L     | 0.74  | [0.033, 1]                                   | 1.5e-05                 | 0.00044 | 0.0029  | 0.01    | 0.026   | 0.056   | 0.1     | 0.15  | 0.65   |
| 11  | L     | 1     | [1, 1]*                                      | 1.2e-19                 | 8.3e-14 | 1.5e-10 | 2.5e-08 | 1.3e-06 | 3.3e-05 | 0.00059 | 0.014 | 0.99   |
| 12  | H     | 0.42  | [0.012, 1]                                   | 5.5e-05                 | 0.0016  | 0.01    | 0.035   | 0.086   | 0.16    | 0.23    | 0.19  | 0.29   |
| 13  | H     | 0.052 | [1.8e-05, 0.41]                              | 0.16                    | 0.16    | 0.16    | 0.15    | 0.14    | 0.11    | 0.073   | 0.025 | 0.015  |
| 14  | K     | 0.04  | [1.8e-05, 0.16]                              | 0.17                    | 0.17    | 0.17    | 0.16    | 0.14    | 0.11    | 0.061   | 0.016 | 0.008  |
| 15  | K     | 0.04  | [1.8e-05, 0.16]                              | 0.17                    | 0.17    | 0.17    | 0.16    | 0.14    | 0.11    | 0.061   | 0.016 | 0.008  |
| 16  | E     | 0.055 | [1.8e-05, 0.41]                              | 0.17                    | 0.17    | 0.16    | 0.15    | 0.14    | 0.11    | 0.066   | 0.022 | 0.02   |
| 17  | D     | 0.038 | [1.8e-05, 0.16]                              | 0.18                    | 0.18    | 0.17    | 0.16    | 0.14    | 0.1     | 0.056   | 0.014 | 0.008  |
| 18  | E     | 0.94  | [0.41, 1]                                    | 4e-14                   | 9.4e-10 | 2.6e-07 | 1.2e-05 | 0.00021 | 0.0022  | 0.015   | 0.088 | 0.89   |
| 19  | S     | 0.96  | [0.41, 1]                                    | 2.9e-14                 | 7e-10   | 1.9e-07 | 8.6e-06 | 0.00015 | 0.0015  | 0.01    | 0.06  | 0.93   |
| 20  | E     | 0.92  | [0.41, 1]                                    | 5.2e-14                 | 1.2e-09 | 3.4e-07 | 1.6e-05 | 0.00028 | 0.0028  | 0.02    | 0.11  | 0.87   |
| 21  | N     | 0.97  | [0.41, 1]                                    | 1.4e-14                 | 3.3e-10 | 9.1e-08 | 4.3e-06 | 8e-05   | 0.00088 | 0.0071  | 0.057 | 0.93   |
| 22  | V     | 0.97  | [0.41, 1]                                    | 1.8e-14                 | 4.2e-10 | 1.1e-07 | 5.2e-06 | 9.5e-05 | 0.00098 | 0.0071  | 0.05  | 0.94   |
| 23  | P     | 0.99  | [0.41, 1]                                    | 2.7e-15                 | 6.4e-11 | 1.8e-08 | 8.4e-07 | 1.7e-05 | 0.0002  | 0.002   | 0.024 | 0.97   |
| 24  | S     | 0.92  | [0.16, 1]                                    | 4.5e-10                 | 3.7e-07 | 1.6e-05 | 0.0002  | 0.0014  | 0.0066  | 0.025   | 0.089 | 0.88   |
| 25  | E     | 0.93  | [0.16, 1]                                    | 1.8e-10                 | 1.5e-07 | 6.6e-06 | 9.1e-05 | 0.00074 | 0.0044  | 0.021   | 0.091 | 0.88   |
| 26  | V     | 0.08  | [1.8e-05, 1]                                 | 0.15                    | 0.15    | 0.15    | 0.14    | 0.13    | 0.11    | 0.084   | 0.037 | 0.035  |
| 27  | V     | 0.89  | [0.16, 1]                                    | 8.7e-10                 | 7.1e-07 | 3e-05   | 0.00038 | 0.0026  | 0.012   | 0.041   | 0.12  | 0.82   |
| 28  | C     | 0.82  | [0.076, 1]                                   | 9.3e-06                 | 0.00027 | 0.0017  | 0.0062  | 0.016   | 0.035   | 0.068   | 0.12  | 0.75   |
| 29  | A     | 0.97  | [0.41, 1]                                    | 1.4e-10                 | 1.2e-07 | 4.9e-06 | 6.4e-05 | 0.00046 | 0.0023  | 0.0099  | 0.048 | 0.94   |
| 30  | E     | 0.08  | [1.8e-05, 1]                                 | 0.15                    | 0.15    | 0.15    | 0.14    | 0.13    | 0.12    | 0.085   | 0.038 | 0.035  |
| 31  | T     | 0.85  | [0.076, 1]                                   | 7.6e-06                 | 0.00022 | 0.0014  | 0.0051  | 0.013   | 0.03    | 0.058   | 0.11  | 0.78   |
| 32  | T     | 0.25  | [1.8e-05, 1]                                 | 0.11                    | 0.11    | 0.11    | 0.11    | 0.11    | 0.1     | 0.091   | 0.069 | 0.2    |
| 33  | T     | 0.28  | [1.8e-05, 1]                                 | 0.1                     | 0.1     | 0.1     | 0.1     | 0.1     | 0.097   | 0.089   | 0.071 | 0.23   |
| 34  | A     | 0.82  | [0.033, 1]                                   | 9.6e-06                 | 0.00028 | 0.0018  | 0.0064  | 0.017   | 0.036   | 0.069   | 0.12  | 0.75   |
| 35  | Y     | 0.069 | [1.8e-05, 1]                                 | 0.15                    | 0.15    | 0.15    | 0.15    | 0.14    | 0.12    | 0.083   | 0.035 | 0.026  |
| 36  | G     | 0.072 | [1.8e-05, 1]                                 | 0.15                    | 0.15    | 0.15    | 0.15    | 0.14    | 0.11    | 0.082   | 0.034 | 0.029  |
| 37  | D     | 0.26  | [0.012, 1]                                   | 9.6e-05                 | 0.0027  | 0.017   | 0.059   | 0.14    | 0.23    | 0.27    | 0.15  | 0.13   |
| 38  | E     | 0.3   | [0.012, 1]                                   | 8.1e-05                 | 0.0023  | 0.015   | 0.051   | 0.12    | 0.21    | 0.26    | 0.17  | 0.17   |
| 39  | V     | 0.062 | [1.8e-05, 0.41]                              | 0.16                    | 0.16    | 0.16    | 0.15    | 0.14    | 0.11    | 0.079   | 0.03  | 0.021  |
| 40  | I     | 0.7   | [0.033, 1]                                   | 1.9e-05                 | 0.00054 | 0.0035  | 0.012   | 0.032   | 0.066   | 0.12    | 0.16  | 0.61   |
| 41  | Q     | 0.81  | [0.076, 1]                                   | 2.2e-09                 | 1.8e-06 | 7.7e-05 | 0.00096 | 0.0063  | 0.026   | 0.079   | 0.17  | 0.72   |
| 42  | S     | 0.73  | [0.033, 1]                                   | 1.7e-05                 | 0.00047 | 0.0031  | 0.011   | 0.028   | 0.058   | 0.1     | 0.15  | 0.65   |
| 43  | A     | 0.94  | [0.41, 1]                                    | 3.1e-10                 | 2.6e-07 | 1.1e-05 | 0.00014 | 0.00099 | 0.0048  | 0.019   | 0.074 | 0.9    |
| 44  | D     | 0.34  | [0.012, 1]                                   | 7.1e-05                 | 0.002   | 0.013   | 0.045   | 0.11    | 0.19    | 0.25    | 0.18  | 0.2    |
| 45  | V     | 0.061 | [1.8e-05, 0.41]                              | 0.16                    | 0.16    | 0.16    | 0.15    | 0.14    | 0.11    | 0.079   | 0.03  | 0.02   |
| 46  | Y     | 0.066 | [1.8e-05, 0.41]                              | 0.15                    | 0.15    | 0.15    | 0.15    | 0.14    | 0.12    | 0.082   | 0.033 | 0.024  |
| 47  | A     | 0.81  | [0.033, 1]                                   | 1e-05                   | 0.00029 | 0.0019  | 0.0068  | 0.018   | 0.038   | 0.073   | 0.13  | 0.74   |
| 48  | A     | 0.21  | [1.8e-05, 1]                                 | 0.12                    | 0.12    | 0.12    | 0.12    | 0.11    | 0.11    | 0.093   | 0.065 | 0.15   |
| 49  | G     | 0.18  | [1.8e-05, 1]                                 | 0.12                    | 0.12    | 0.12    | 0.12    | 0.12    | 0.11    | 0.093   | 0.062 | 0.13   |
| 50  | E     | 0.89  | [0.16, 1]                                    | 7.2e-10                 | 5.9e-07 | 2.5e-05 | 0.00032 | 0.0022  | 0.01    | 0.037   | 0.12  | 0.83   |
| 51  | V     | 0.17  | [1.8e-05, 1]                                 | 0.13                    | 0.13    | 0.13    | 0.12    | 0.12    | 0.11    | 0.094   | 0.06  | 0.12   |
| 52  | N     | 0.96  | [0.41, 1]                                    | 2e-10                   | 1.6e-07 | 7e-06   | 9e-05   | 0.00064 | 0.0032  | 0.013   | 0.058 | 0.92   |
| 53  | D     | 0.91  | [0.16, 1]                                    | 5.4e-10                 | 4.4e-07 | 1.9e-05 | 0.00024 | 0.0017  | 0.008   | 0.03    | 0.098 | 0.86   |
| 54  | D     | 0.96  | [0.41, 1]                                    | 2.3e-14                 | 5.4e-10 | 1.5e-07 | 6.8e-06 | 0.00012 | 0.0012  | 0.0089  | 0.059 | 0.93   |
| 55  | K     | 0.9   | [0.16, 1]                                    | 6.7e-10                 | 5.5e-07 | 2.3e-05 | 0.0003  | 0.002   | 0.0096  | 0.035   | 0.11  | 0.84   |
| 56  | F     | 1     | [1, 1]*                                      | 3.7e-17                 | 4.4e-13 | 2.7e-10 | 3.7e-08 | 2.2e-06 | 8.8e-05 | 0.0052  | 0.99  |        |
| 57  | A     | 0.97  | [0.41, 1]                                    | 1.8e-18                 | 1.2e-12 | 2.2e-09 | 3.6e-07 | 1.7e-05 | 0.00037 | 0.0049  | 0.055 | 0.94   |
| 58  | E     | 0.91  | [0.16, 1]                                    | 7e-14                   | 1.7e-09 | 4.5e-07 | 2.1e-05 | 0.00037 | 0.0036  | 0.024   | 0.12  | 0.85   |
| 59  | Y     | 0.19  | [1.8e-05, 1]                                 | 0.12                    | 0.12    | 0.12    | 0.12    | 0.12    | 0.11    | 0.093   | 0.063 | 0.13   |
| 60  | E     | 0.037 | [1.8e-05, 0.16]                              | 0.18                    | 0.18    | 0.17    | 0.16    | 0.14    | 0.1     | 0.055   | 0.014 | 0.0076 |
| 61  | K     | 0.036 | [1.8e-05, 0.16]                              | 0.17                    | 0.17    | 0.17    | 0.16    | 0.14    | 0.1     | 0.058   | 0.014 | 0.0055 |
| 62  | A     | 0.055 | [1.8e-05, 0.41]                              | 0.16                    | 0.16    | 0.16    | 0.15    | 0.14    | 0.11    | 0.073   | 0.025 | 0.018  |
| 63  | R     | 1     | [1, 1]*                                      | 4.9e-14                 | 4.5e-11 | 3.2e-09 | 1.1e-07 | 2.7e-06 | 5e-05   | 0.00077 | 0.016 | 0.98   |
| 64  | K     | 0.36  | [0.012, 1]                                   | 7.2e-05                 | 0.0021  | 0.013   | 0.045   | 0.11    | 0.19    | 0.24    | 0.17  | 0.23   |
| 65  | E     | 0.054 | [1.8e-05, 0.41]                              | 0.17                    | 0.17    | 0.17    | 0.16    | 0.14    | 0.1     | 0.062   | 0.021 | 0.021  |
| 66  | E     | 0.037 | [1.8e-05, 0.16]                              | 0.18                    | 0.18    | 0.17    | 0.16    | 0.14    | 0.099   | 0.053   | 0.014 | 0.0075 |
| 67  | K     | 0.039 | [1.8e-05, 0.16]                              | 0.17                    | 0.17    | 0.17    | 0.16    | 0.14    | 0.11    | 0.062   | 0.017 | 0.0071 |
| 68  | H     | 0.051 | [1.8e-05, 0.41]                              | 0.16                    | 0.16    | 0.16    | 0.15    | 0.14    | 0.11    | 0.072   | 0.024 | 0.014  |
| 69  | H     | 0.047 | [1.8e-05, 0.41]                              | 0.17                    | 0.16    | 0.16    | 0.15    | 0.14    | 0.11    | 0.071   | 0.022 | 0.011  |
| 70  | K     | 0.04  | [1.8e-05, 0.16]                              | 0.17                    | 0.17    | 0.17    | 0.16    | 0.14    | 0.11    | 0.063   | 0.017 | 0.0075 |
| 71  | H     | 0.41  | [0.012, 1]                                   | 5.9e-05                 | 0.0017  | 0.011   | 0.037   | 0.09    | 0.17    | 0.23    | 0.19  | 0.27   |
| 72  | L     | 0.98  | [0.41, 1]                                    | 6.6e-19                 | 4.5e-13 | 8e-10   | 1.3e-07 | 6.5e-06 | 0.00015 | 0.0024  | 0.036 | 0.96   |
| 73  | E     | 0.037 | [1.8e-05, 0.16]                              | 0.18                    | 0.18    | 0.17    | 0.16    | 0.14    | 0.1     | 0.055   | 0.014 | 0.0076 |
| 74  | E     | 0.91  | [0.16, 1]                                    | 7.3e-14                 | 1.7e-09 | 4.7e-07 | 2.1e-05 | 0.00038 | 0.0037  | 0.024   | 0.12  | 0.85   |
| 75  | L     | 0.94  | [0.41, 1]                                    | 3e-10                   | 2.5e-07 | 1e-05   | 0.00013 | 0.00094 | 0.0046  | 0.018   | 0.074 | 0.9    |
| 76  | G     | 0.52  | [0.012, 1]                                   | 4e-05                   | 0.0011  | 0.0073  | 0.026   | 0.064   | 0.1     | 0.19    | 0.19  | 0.39   |
| 77  | G     | 0.81  | [0.076, 1]                                   | 2.4e-09                 | 2e-06   | 8.3e-05 | 0.001   | 0.0067  | 0.028   | 0.081   | 0.16  | 0.72   |
| 78  | L     | 0.16  | [1.8e-05, 1]                                 | 0.13                    | 0.13    | 0.13    | 0.13    | 0.12    | 0.11    | 0.091   | 0.056 | 0.11   |
| 79  | G     | 0.083 | [1.8e-05, 1]                                 | 0.15                    | 0.15    | 0.15    | 0.14    | 0.13    | 0.11    | 0.084   | 0.038 | 0.038  |
| 80  | T     | 0.89  | [0.16, 1]                                    | 8.1e-10                 | 6.6e-07 | 2.8e-05 | 0.00036 | 0.0024  | 0.011   | 0.04    | 0.12  | 0.83   |
| 81  | V     | 0.85  | [0.16, 1]                                    | 1.3e-09                 | 1.1e-06 | 4.7e-05 | 0.00059 | 0.004   | 0.018   | 0.059   | 0.15  | 0.77   |
| 82  | A     | 0.085 | [1.8e-05, 1]                                 | 0.15                    | 0.15    | 0.15    | 0.14    | 0.13    | 0.11    | 0.084   | 0.038 | 0.04   |
| 83  | A     | 0.59  | [0.012, 1]                                   | 3e-05                   | 0.00085 | 0.0055  | 0.019   | 0.049   | 0.098   | 0.16    | 0.19  | 0.48   |
| 84  | G     | 0.084 | [1.8e-05, 1]                                 | 0.15                    | 0.15    | 0.15    | 0.14    | 0.13    | 0.12    | 0.087   | 0.04  | 0.037  |
| 85  | A     | 0.59  | [0.012, 1]                                   | 3.2e-05                 | 0.00093 | 0.006   | 0.021   | 0.052   | 0.1     | 0.16    | 0.18  | 0.47   |
| 86  | F     | 0.71  | [0.033, 1]                                   | 1.8e-05                 | 0.00053 | 0.0034  | 0.012   | 0.031   | 0.064   | 0.11    | 0.16  | 0.62   |
| 87  | A     | 0.1   | [1.8e-05, 1]                                 | 0.14                    | 0.14    | 0.14    | 0.14    | 0.13    | 0.11    | 0.088   | 0.044 | 0.056  |
| 88  | L     | 0.94  | [0.41, 1]                                    | 3.4e-10                 | 2.8e-07 | 1.2e-05 | 0.00015 | 0.001   | 0.005   | 0.019   | 0.068 | 0.91   |

|     |   |       |                |         |         |         |         |         |         |         |       |        |
|-----|---|-------|----------------|---------|---------|---------|---------|---------|---------|---------|-------|--------|
| 89  | H | 0.056 | [1.8e-05,0.41] | 0.16    | 0.16    | 0.16    | 0.15    | 0.14    | 0.11    | 0.074   | 0.026 | 0.018  |
| 90  | E | 0.037 | [1.8e-05,0.16] | 0.18    | 0.18    | 0.17    | 0.16    | 0.14    | 0.099   | 0.053   | 0.014 | 0.0075 |
| 91  | K | 0.036 | [1.8e-05,0.16] | 0.17    | 0.17    | 0.17    | 0.16    | 0.14    | 0.1     | 0.058   | 0.014 | 0.0055 |
| 92  | H | 0.05  | [1.8e-05,0.41] | 0.16    | 0.16    | 0.16    | 0.15    | 0.14    | 0.11    | 0.071   | 0.023 | 0.014  |
| 93  | A | 0.92  | [0.16,1]       | 5.5e-10 | 4.5e-07 | 1.9e-05 | 0.00024 | 0.0016  | 0.0076  | 0.027   | 0.088 | 0.88   |
| 94  | S | 0.95  | [0.41,1]       | 3.7e-14 | 8.7e-10 | 2.4e-07 | 1.1e-05 | 0.00019 | 0.0019  | 0.013   | 0.073 | 0.91   |
| 95  | K | 0.039 | [1.8e-05,0.16] | 0.17    | 0.17    | 0.17    | 0.16    | 0.14    | 0.11    | 0.062   | 0.017 | 0.0071 |
| 96  | K | 0.045 | [1.8e-05,0.41] | 0.17    | 0.17    | 0.17    | 0.16    | 0.14    | 0.11    | 0.066   | 0.019 | 0.011  |
| 97  | D | 0.043 | [1.8e-05,0.41] | 0.17    | 0.17    | 0.17    | 0.16    | 0.14    | 0.1     | 0.059   | 0.017 | 0.012  |
| 98  | P | 0.17  | [1.8e-05,1]    | 0.13    | 0.13    | 0.13    | 0.12    | 0.12    | 0.11    | 0.093   | 0.059 | 0.11   |
| 99  | E | 0.042 | [1.8e-05,0.41] | 0.17    | 0.17    | 0.17    | 0.16    | 0.14    | 0.1     | 0.057   | 0.016 | 0.011  |
| 100 | N | 1     | [1,1]*         | 2.1e-19 | 1.4e-13 | 2.5e-10 | 4.2e-08 | 2.1e-06 | 5.1e-05 | 0.00084 | 0.016 | 0.98   |
| 101 | A | 0.087 | [1.8e-05,1]    | 0.15    | 0.15    | 0.15    | 0.14    | 0.13    | 0.11    | 0.083   | 0.037 | 0.043  |
| 102 | H | 0.052 | [1.8e-05,0.41] | 0.16    | 0.16    | 0.16    | 0.15    | 0.14    | 0.11    | 0.073   | 0.025 | 0.015  |
| 103 | R | 0.96  | [0.41,1]       | 2.3e-14 | 5.3e-10 | 1.5e-07 | 6.7e-06 | 0.00012 | 0.0013  | 0.009   | 0.059 | 0.93   |
| 104 | H | 0.052 | [1.8e-05,0.41] | 0.16    | 0.16    | 0.16    | 0.15    | 0.14    | 0.11    | 0.073   | 0.025 | 0.015  |
| 105 | K | 0.044 | [1.8e-05,0.41] | 0.17    | 0.17    | 0.17    | 0.16    | 0.14    | 0.11    | 0.066   | 0.019 | 0.01   |
| 106 | I | 0.82  | [0.076,1]      | 7.9e-06 | 0.00023 | 0.0015  | 0.0054  | 0.014   | 0.033   | 0.067   | 0.13  | 0.75   |
| 107 | E | 0.41  | [0.012,1]      | 5.9e-05 | 0.0017  | 0.011   | 0.037   | 0.09    | 0.16    | 0.23    | 0.19  | 0.28   |
| 108 | E | 0.048 | [1.8e-05,0.41] | 0.17    | 0.17    | 0.17    | 0.16    | 0.14    | 0.1     | 0.061   | 0.019 | 0.016  |
| 109 | E | 0.043 | [1.8e-05,0.41] | 0.17    | 0.17    | 0.17    | 0.16    | 0.14    | 0.1     | 0.059   | 0.017 | 0.012  |
| 110 | I | 0.68  | [0.033,1]      | 2.1e-05 | 0.0006  | 0.0039  | 0.014   | 0.035   | 0.072   | 0.12    | 0.17  | 0.58   |
| 111 | A | 0.11  | [1.8e-05,1]    | 0.14    | 0.14    | 0.14    | 0.14    | 0.13    | 0.11    | 0.087   | 0.043 | 0.059  |
| 112 | A | 0.68  | [0.033,1]      | 2.2e-05 | 0.00062 | 0.004   | 0.014   | 0.036   | 0.074   | 0.13    | 0.17  | 0.58   |
| 113 | A | 0.93  | [0.16,1]       | 4e-10   | 3.3e-07 | 1.4e-05 | 0.00018 | 0.0013  | 0.006   | 0.023   | 0.083 | 0.89   |
| 114 | A | 0.62  | [0.033,1]      | 2.8e-05 | 0.00081 | 0.0052  | 0.018   | 0.046   | 0.092   | 0.15    | 0.18  | 0.51   |
| 115 | A | 0.11  | [1.8e-05,1]    | 0.14    | 0.14    | 0.14    | 0.14    | 0.13    | 0.11    | 0.087   | 0.044 | 0.06   |
| 116 | V | 0.057 | [1.8e-05,0.41] | 0.16    | 0.16    | 0.16    | 0.15    | 0.14    | 0.11    | 0.075   | 0.026 | 0.018  |
| 117 | G | 0.091 | [1.8e-05,1]    | 0.15    | 0.15    | 0.15    | 0.14    | 0.13    | 0.11    | 0.086   | 0.04  | 0.045  |
| 118 | A | 0.92  | [0.16,1]       | 4.1e-10 | 3.4e-07 | 1.4e-05 | 0.00018 | 0.0013  | 0.0063  | 0.025   | 0.09  | 0.88   |
| 119 | G | 0.055 | [1.8e-05,0.41] | 0.16    | 0.16    | 0.16    | 0.15    | 0.14    | 0.11    | 0.076   | 0.027 | 0.016  |
| 120 | G | 0.62  | [0.033,1]      | 2.6e-05 | 0.00075 | 0.0048  | 0.017   | 0.043   | 0.089   | 0.15    | 0.19  | 0.51   |
| 121 | Y | 0.076 | [1.8e-05,1]    | 0.15    | 0.15    | 0.15    | 0.15    | 0.13    | 0.12    | 0.084   | 0.037 | 0.031  |
| 122 | V | 0.5   | [0.012,1]      | 4.2e-05 | 0.0012  | 0.0078  | 0.027   | 0.067   | 0.13    | 0.2     | 0.2   | 0.37   |
| 123 | F | 0.16  | [1.8e-05,1]    | 0.13    | 0.13    | 0.13    | 0.13    | 0.12    | 0.11    | 0.093   | 0.059 | 0.11   |
| 124 | H | 0.055 | [1.8e-05,0.41] | 0.16    | 0.16    | 0.16    | 0.15    | 0.14    | 0.11    | 0.074   | 0.026 | 0.017  |
| 125 | E | 0.043 | [1.8e-05,0.41] | 0.17    | 0.17    | 0.17    | 0.16    | 0.14    | 0.1     | 0.059   | 0.017 | 0.012  |
| 126 | H | 0.057 | [1.8e-05,0.41] | 0.16    | 0.16    | 0.16    | 0.15    | 0.14    | 0.11    | 0.074   | 0.026 | 0.019  |
| 127 | H | 0.054 | [1.8e-05,0.41] | 0.16    | 0.16    | 0.16    | 0.15    | 0.14    | 0.11    | 0.073   | 0.025 | 0.016  |
| 128 | E | 0.042 | [1.8e-05,0.41] | 0.17    | 0.17    | 0.17    | 0.16    | 0.14    | 0.1     | 0.057   | 0.016 | 0.011  |
| 129 | K | 0.04  | [1.8e-05,0.16] | 0.17    | 0.17    | 0.17    | 0.16    | 0.14    | 0.11    | 0.061   | 0.016 | 0.008  |
| 130 | K | 0.045 | [1.8e-05,0.41] | 0.17    | 0.17    | 0.17    | 0.16    | 0.14    | 0.11    | 0.064   | 0.018 | 0.011  |
| 131 | E | 0.055 | [1.8e-05,0.41] | 0.17    | 0.17    | 0.16    | 0.15    | 0.14    | 0.11    | 0.066   | 0.022 | 0.02   |
| 132 | S | 0.72  | [0.033,1]      | 1.8e-05 | 0.00051 | 0.0033  | 0.012   | 0.03    | 0.062   | 0.11    | 0.15  | 0.63   |
| 133 | K | 0.06  | [1.8e-05,0.41] | 0.16    | 0.16    | 0.16    | 0.15    | 0.14    | 0.11    | 0.077   | 0.028 | 0.021  |
| 134 | E | 0.052 | [1.8e-05,0.41] | 0.17    | 0.17    | 0.17    | 0.16    | 0.14    | 0.1     | 0.062   | 0.02  | 0.018  |
| 135 | E | 0.44  | [0.012,1]      | 5.3e-05 | 0.0015  | 0.0098  | 0.034   | 0.082   | 0.15    | 0.22    | 0.19  | 0.31   |
| 136 | E | 0.98  | [0.41,1]       | 1.1e-14 | 2.6e-10 | 7e-08   | 3.3e-06 | 6e-05   | 0.00066 | 0.0052  | 0.043 | 0.95   |
| 137 | K | 0.46  | [0.012,1]      | 4.9e-05 | 0.0014  | 0.0091  | 0.032   | 0.077   | 0.15    | 0.21    | 0.19  | 0.34   |
| 138 | E | 0.054 | [1.8e-05,0.41] | 0.17    | 0.17    | 0.16    | 0.16    | 0.14    | 0.1     | 0.064   | 0.021 | 0.02   |
| 139 | A | 0.66  | [0.033,1]      | 2.5e-05 | 0.00071 | 0.0046  | 0.016   | 0.041   | 0.082   | 0.13    | 0.16  | 0.56   |
| 140 | E | 0.87  | [0.16,1]       | 1.6e-09 | 1.3e-06 | 5.5e-05 | 0.00068 | 0.0044  | 0.018   | 0.053   | 0.12  | 0.8    |
| 141 | G | 0.066 | [1.8e-05,0.41] | 0.15    | 0.15    | 0.15    | 0.15    | 0.14    | 0.12    | 0.082   | 0.033 | 0.024  |
| 142 | K | 0.48  | [0.012,1]      | 4.6e-05 | 0.0013  | 0.0085  | 0.03    | 0.073   | 0.14    | 0.2     | 0.19  | 0.36   |
| 143 | K | 0.71  | [0.076,1]      | 3.3e-09 | 2.7e-06 | 0.00011 | 0.0014  | 0.0094  | 0.041   | 0.12    | 0.24  | 0.59   |
| 144 | H | 0.054 | [1.8e-05,0.41] | 0.16    | 0.16    | 0.16    | 0.15    | 0.14    | 0.11    | 0.074   | 0.025 | 0.016  |
| 145 | H | 0.69  | [0.033,1]      | 1.4e-05 | 0.00041 | 0.0027  | 0.0098  | 0.027   | 0.063   | 0.12    | 0.18  | 0.59   |
| 146 | H | 0.46  | [0.012,1]      | 5.1e-05 | 0.0015  | 0.0093  | 0.032   | 0.079   | 0.15    | 0.21    | 0.19  | 0.33   |
| 147 | L | 0.8   | [0.033,1]      | 1.1e-05 | 0.00031 | 0.002   | 0.0072  | 0.019   | 0.041   | 0.077   | 0.13  | 0.72   |
| 148 | F | 0.16  | [1.8e-05,1]    | 0.13    | 0.13    | 0.13    | 0.13    | 0.12    | 0.11    | 0.093   | 0.058 | 0.1    |
| 149 | Y | 0.47  | [1.8e-05,1]    | 0.073   | 0.073   | 0.073   | 0.073   | 0.073   | 0.073   | 0.073   | 0.073 | 0.41   |
| 150 | V | 0.47  | [1.8e-05,1]    | 0.073   | 0.073   | 0.073   | 0.073   | 0.073   | 0.073   | 0.073   | 0.073 | 0.41   |
| 151 | R | 0.47  | [1.8e-05,1]    | 0.073   | 0.073   | 0.073   | 0.073   | 0.073   | 0.073   | 0.073   | 0.073 | 0.41   |
| 152 | C | 0.47  | [1.8e-05,1]    | 0.073   | 0.073   | 0.073   | 0.073   | 0.073   | 0.073   | 0.073   | 0.073 | 0.41   |
| 153 | H | 0.47  | [1.8e-05,1]    | 0.073   | 0.073   | 0.073   | 0.073   | 0.073   | 0.073   | 0.073   | 0.073 | 0.41   |

Supplementary Table 4: Ka/Ks values per LP3-0 amino acid. First are represented amino acid position, then amino acid, w-score, confidence interval and Bayesian posterior probabilities.

(b) LP3-1

Selecton Bayesian Ka/Ks Results  
Displayed on sequence 1

| POS | AMINO | Ka/Ks | [Confidence Interval]( <sup>*</sup> if lower bound > 1) | POSTERIOR PROBABILITIES |         |         |         |         |         |         |       |       |   |
|-----|-------|-------|---------------------------------------------------------|-------------------------|---------|---------|---------|---------|---------|---------|-------|-------|---|
|     |       |       |                                                         | w =                     | 6.2e-10 | 4.4e-07 | 2e-05   | 0.0003  | 0.0023  | 0.013   | 0.054 | 0.26  | 1 |
| 1   | M     | 0.13  | [6.2e-10,1]                                             | 0.12                    | 0.12    | 0.12    | 0.12    | 0.12    | 0.12    | 0.11    | 0.074 | 0.1   |   |
| 2   | S     | 0.25  | [6.2e-10,1]                                             | 0.1                     | 0.1     | 0.1     | 0.1     | 0.1     | 0.1     | 0.096   | 0.082 | 0.22  |   |
| 3   | E     | 0.14  | [6.2e-10,1]                                             | 0.12                    | 0.12    | 0.12    | 0.12    | 0.12    | 0.12    | 0.1     | 0.059 | 0.12  |   |
| 4   | E     | 0.95  | [0.26,1]                                                | 4.7e-15                 | 4.4e-13 | 9.3e-10 | 2e-07   | 1.2e-05 | 0.00034 | 0.0056  | 0.074 | 0.92  |   |
| 5   | K     | 0.11  | [6.2e-10,1]                                             | 0.12                    | 0.12    | 0.12    | 0.12    | 0.12    | 0.12    | 0.11    | 0.066 | 0.082 |   |
| 6   | Q     | 0.85  | [0.054,1]                                               | 5.8e-10                 | 4.2e-07 | 1.9e-05 | 0.00028 | 0.0022  | 0.011   | 0.045   | 0.14  | 0.8   |   |
| 7   | H     | 0.12  | [6.2e-10,1]                                             | 0.12                    | 0.12    | 0.12    | 0.12    | 0.12    | 0.12    | 0.11    | 0.071 | 0.097 |   |
| 8   | H     | 0.97  | [0.26,1]                                                | 2.5e-12                 | 1.8e-09 | 8.2e-08 | 1.3e-06 | 1.6e-05 | 0.00024 | 0.0035  | 0.051 | 0.94  |   |
| 9   | H     | 0.13  | [6.2e-10,1]                                             | 0.12                    | 0.12    | 0.12    | 0.12    | 0.12    | 0.12    | 0.11    | 0.072 | 0.1   |   |
| 10  | L     | 0.96  | [0.26,1]                                                | 6.8e-11                 | 4.8e-08 | 2.2e-06 | 3.2e-05 | 0.00026 | 0.0015  | 0.0074  | 0.053 | 0.94  |   |
| 11  | F     | 0.26  | [6.2e-10,1]                                             | 0.098                   | 0.098   | 0.098   | 0.098   | 0.098   | 0.097   | 0.095   | 0.083 | 0.23  |   |
| 12  | H     | 0.97  | [0.26,1]                                                | 2.4e-15                 | 2.3e-13 | 4.3e-10 | 9.3e-08 | 5.7e-06 | 0.00016 | 0.0028  | 0.045 | 0.95  |   |
| 13  | H     | 0.14  | [6.2e-10,1]                                             | 0.12                    | 0.12    | 0.12    | 0.12    | 0.12    | 0.12    | 0.11    | 0.072 | 0.11  |   |
| 14  | H     | 0.85  | [0.054,1]                                               | 5e-10                   | 3.6e-07 | 1.6e-05 | 0.00024 | 0.0019  | 0.0099  | 0.04    | 0.14  | 0.81  |   |
| 15  | K     | 0.087 | [6.2e-10,1]                                             | 0.13                    | 0.13    | 0.13    | 0.13    | 0.13    | 0.12    | 0.11    | 0.057 | 0.064 |   |
| 16  | E     | 0.15  | [6.2e-10,1]                                             | 0.12                    | 0.12    | 0.12    | 0.12    | 0.12    | 0.12    | 0.1     | 0.062 | 0.12  |   |
| 17  | D     | 0.94  | [0.26,1]                                                | 3.5e-15                 | 5e-13   | 1.1e-09 | 2.3e-07 | 1.4e-05 | 0.00038 | 0.0063  | 0.081 | 0.91  |   |
| 18  | G     | 0.92  | [0.26,1]                                                | 1.9e-10                 | 1.4e-07 | 6.4e-06 | 9.3e-05 | 0.00073 | 0.004   | 0.018   | 0.089 | 0.89  |   |
| 19  | G     | 0.97  | [0.26,1]                                                | 5.5e-15                 | 2.5e-13 | 5.2e-10 | 1.1e-07 | 6.8e-06 | 0.00019 | 0.0032  | 0.05  | 0.95  |   |
| 20  | E     | 0.84  | [0.054,1]                                               | 6.4e-10                 | 4.6e-07 | 2.1e-05 | 0.00031 | 0.0024  | 0.012   | 0.049   | 0.15  | 0.79  |   |
| 21  | Q     | 0.97  | [0.26,1]                                                | 1.1e-14                 | 1.9e-13 | 4e-10   | 8.6e-08 | 5.3e-06 | 0.00015 | 0.0026  | 0.045 | 0.95  |   |
| 22  | V     | 0.37  | [6.2e-10,1]                                             | 0.083                   | 0.083   | 0.083   | 0.083   | 0.083   | 0.083   | 0.083   | 0.081 | 0.34  |   |
| 23  | I     | 0.38  | [6.2e-10,1]                                             | 0.081                   | 0.081   | 0.081   | 0.081   | 0.081   | 0.081   | 0.081   | 0.08  | 0.35  |   |
| 24  | E     | 0.35  | [6.2e-10,1]                                             | 0.085                   | 0.085   | 0.085   | 0.085   | 0.085   | 0.085   | 0.085   | 0.081 | 0.32  |   |
| 25  | S     | 0.38  | [6.2e-10,1]                                             | 0.081                   | 0.081   | 0.081   | 0.081   | 0.081   | 0.081   | 0.081   | 0.08  | 0.35  |   |
| 26  | T     | 0.38  | [6.2e-10,1]                                             | 0.081                   | 0.081   | 0.081   | 0.081   | 0.081   | 0.081   | 0.081   | 0.08  | 0.35  |   |
| 27  | D     | 0.36  | [6.2e-10,1]                                             | 0.085                   | 0.085   | 0.085   | 0.085   | 0.085   | 0.085   | 0.084   | 0.081 | 0.33  |   |
| 28  | V     | 0.37  | [6.2e-10,1]                                             | 0.082                   | 0.082   | 0.082   | 0.082   | 0.082   | 0.082   | 0.082   | 0.08  | 0.34  |   |
| 29  | Y     | 0.38  | [6.2e-10,1]                                             | 0.082                   | 0.082   | 0.082   | 0.082   | 0.082   | 0.082   | 0.082   | 0.08  | 0.35  |   |
| 30  | A     | 0.89  | [0.054,1]                                               | 3.4e-10                 | 2.4e-07 | 1.1e-05 | 0.00016 | 0.0013  | 0.0067  | 0.027   | 0.11  | 0.86  |   |
| 31  | A     | 0.18  | [6.2e-10,1]                                             | 0.11                    | 0.11    | 0.11    | 0.11    | 0.11    | 0.11    | 0.11    | 0.1   | 0.078 |   |
| 32  | G     | 0.99  | [1,1]*                                                  | 7.2e-17                 | 7.2e-14 | 1.6e-10 | 3.4e-08 | 2.1e-06 | 6e-05   | 0.0011  | 0.022 | 0.98  |   |
| 33  | N     | 0.95  | [0.26,1]                                                | 5.2e-15                 | 4.2e-13 | 8.8e-10 | 1.9e-07 | 1.2e-05 | 0.00032 | 0.0053  | 0.072 | 0.92  |   |
| 34  | V     | 0.88  | [0.054,1]                                               | 4.1e-10                 | 3e-07   | 1.4e-05 | 0.0002  | 0.0015  | 0.0081  | 0.033   | 0.12  | 0.84  |   |
| 35  | D     | 0.99  | [1,1]*                                                  | 5.8e-16                 | 6.5e-14 | 6.7e-11 | 1.4e-08 | 9e-07   | 2.8e-05 | 0.00064 | 0.022 | 0.98  |   |
| 36  | E     | 0.97  | [0.26,1]                                                | 1.2e-14                 | 1.9e-13 | 3.9e-10 | 8.4e-08 | 5.1e-06 | 0.00015 | 0.0025  | 0.042 | 0.96  |   |
| 37  | Y     | 0.15  | [6.2e-10,1]                                             | 0.12                    | 0.12    | 0.12    | 0.12    | 0.12    | 0.12    | 0.11    | 0.078 | 0.12  |   |
| 38  | E     | 0.14  | [6.2e-10,1]                                             | 0.12                    | 0.12    | 0.12    | 0.12    | 0.12    | 0.12    | 0.1     | 0.059 | 0.12  |   |
| 39  | K     | 0.087 | [6.2e-10,1]                                             | 0.13                    | 0.13    | 0.13    | 0.13    | 0.13    | 0.13    | 0.12    | 0.11  | 0.057 |   |
| 40  | A     | 0.92  | [0.26,1]                                                | 2e-10                   | 1.5e-07 | 6.7e-06 | 9.8e-05 | 0.00077 | 0.0041  | 0.018   | 0.083 | 0.89  |   |
| 41  | K     | 0.87  | [0.054,1]                                               | 4.7e-10                 | 3.4e-07 | 1.5e-05 | 0.00023 | 0.0018  | 0.0093  | 0.037   | 0.12  | 0.83  |   |
| 42  | K     | 0.087 | [6.2e-10,1]                                             | 0.13                    | 0.13    | 0.13    | 0.13    | 0.13    | 0.12    | 0.11    | 0.057 | 0.064 |   |
| 43  | D     | 0.88  | [0.054,1]                                               | 5.2e-10                 | 3.7e-07 | 1.7e-05 | 0.00025 | 0.0019  | 0.01    | 0.038   | 0.11  | 0.84  |   |
| 44  | E     | 0.14  | [6.2e-10,1]                                             | 0.12                    | 0.12    | 0.12    | 0.12    | 0.12    | 0.12    | 0.1     | 0.059 | 0.12  |   |
| 45  | K     | 0.087 | [6.2e-10,1]                                             | 0.13                    | 0.13    | 0.13    | 0.13    | 0.13    | 0.12    | 0.11    | 0.057 | 0.064 |   |
| 46  | H     | 0.13  | [6.2e-10,1]                                             | 0.12                    | 0.12    | 0.12    | 0.12    | 0.12    | 0.12    | 0.11    | 0.072 | 0.1   |   |
| 47  | H     | 0.14  | [6.2e-10,1]                                             | 0.12                    | 0.12    | 0.12    | 0.12    | 0.12    | 0.12    | 0.11    | 0.072 | 0.11  |   |
| 48  | K     | 0.087 | [6.2e-10,1]                                             | 0.13                    | 0.13    | 0.13    | 0.13    | 0.13    | 0.12    | 0.11    | 0.057 | 0.064 |   |
| 49  | H     | 0.96  | [0.26,1]                                                | 7.1e-11                 | 5e-08   | 2.3e-06 | 3.4e-05 | 0.00027 | 0.0015  | 0.0077  | 0.054 | 0.94  |   |
| 50  | M     | 0.13  | [6.2e-10,1]                                             | 0.12                    | 0.12    | 0.12    | 0.12    | 0.12    | 0.12    | 0.11    | 0.074 | 0.099 |   |
| 51  | E     | 0.14  | [6.2e-10,1]                                             | 0.12                    | 0.12    | 0.12    | 0.12    | 0.12    | 0.12    | 0.1     | 0.059 | 0.12  |   |
| 52  | H     | 0.13  | [6.2e-10,1]                                             | 0.12                    | 0.12    | 0.12    | 0.12    | 0.12    | 0.12    | 0.11    | 0.072 | 0.1   |   |
| 53  | L     | 0.26  | [6.2e-10,1]                                             | 0.099                   | 0.099   | 0.099   | 0.099   | 0.098   | 0.098   | 0.094   | 0.081 | 0.23  |   |
| 54  | G     | 0.13  | [6.2e-10,1]                                             | 0.12                    | 0.12    | 0.12    | 0.12    | 0.12    | 0.12    | 0.11    | 0.068 | 0.099 |   |
| 55  | E     | 0.15  | [6.2e-10,1]                                             | 0.12                    | 0.12    | 0.12    | 0.12    | 0.12    | 0.12    | 0.1     | 0.062 | 0.12  |   |
| 56  | M     | 0.93  | [0.26,1]                                                | 1.8e-10                 | 1.3e-07 | 6e-06   | 8.8e-05 | 0.00069 | 0.0037  | 0.016   | 0.072 | 0.91  |   |
| 57  | G     | 0.12  | [6.2e-10,1]                                             | 0.12                    | 0.12    | 0.12    | 0.12    | 0.12    | 0.12    | 0.11    | 0.073 | 0.092 |   |
| 58  | T     | 0.89  | [0.054,1]                                               | 3.4e-10                 | 2.5e-07 | 1.1e-05 | 0.00016 | 0.0013  | 0.0068  | 0.028   | 0.11  | 0.86  |   |
| 59  | V     | 0.17  | [6.2e-10,1]                                             | 0.11                    | 0.11    | 0.11    | 0.11    | 0.11    | 0.11    | 0.1     | 0.076 | 0.14  |   |
| 60  | A     | 0.19  | [6.2e-10,1]                                             | 0.11                    | 0.11    | 0.11    | 0.11    | 0.11    | 0.11    | 0.1     | 0.079 | 0.16  |   |
| 61  | A     | 0.19  | [6.2e-10,1]                                             | 0.11                    | 0.11    | 0.11    | 0.11    | 0.11    | 0.11    | 0.1     | 0.079 | 0.16  |   |
| 62  | G     | 0.12  | [6.2e-10,1]                                             | 0.12                    | 0.12    | 0.12    | 0.12    | 0.12    | 0.12    | 0.11    | 0.073 | 0.092 |   |
| 63  | A     | 0.87  | [0.054,1]                                               | 4.3e-10                 | 3.1e-07 | 1.4e-05 | 0.00021 | 0.0016  | 0.0086  | 0.035   | 0.12  | 0.83  |   |
| 64  | F     | 0.27  | [6.2e-10,1]                                             | 0.097                   | 0.097   | 0.097   | 0.097   | 0.097   | 0.097   | 0.094   | 0.083 | 0.24  |   |
| 65  | A     | 0.17  | [6.2e-10,1]                                             | 0.11                    | 0.11    | 0.11    | 0.11    | 0.11    | 0.11    | 0.1     | 0.076 | 0.14  |   |
| 66  | L     | 0.19  | [6.2e-10,1]                                             | 0.11                    | 0.11    | 0.11    | 0.11    | 0.11    | 0.11    | 0.1     | 0.08  | 0.16  |   |
| 67  | H     | 0.85  | [0.054,1]                                               | 5e-10                   | 3.6e-07 | 1.6e-05 | 0.00024 | 0.0019  | 0.0099  | 0.04    | 0.14  | 0.81  |   |
| 68  | E     | 0.14  | [6.2e-10,1]                                             | 0.12                    | 0.12    | 0.12    | 0.12    | 0.12    | 0.12    | 0.1     | 0.059 | 0.12  |   |
| 69  | K     | 0.1   | [6.2e-10,1]                                             | 0.13                    | 0.13    | 0.13    | 0.13    | 0.13    | 0.12    | 0.11    | 0.061 | 0.079 |   |
| 70  | H     | 0.88  | [0.054,1]                                               | 4.1e-10                 | 2.9e-07 | 1.3e-05 | 0.00019 | 0.0015  | 0.008   | 0.033   | 0.12  | 0.84  |   |
| 71  | A     | 0.98  | [0.26,1]                                                | 4.3e-16                 | 1.6e-13 | 3.3e-10 | 7e-08   | 4.3e-06 | 0.00012 | 0.0021  | 0.037 | 0.96  |   |
| 72  | D     | 0.84  | [0.054,1]                                               | 6e-10                   | 4.3e-07 | 2e-05   | 0.00029 | 0.0022  | 0.012   | 0.047   | 0.15  | 0.79  |   |
| 73  | K     | 0.07  | [6.2e-10,1]                                             | 0.13                    | 0.13    | 0.13    | 0.13    | 0.13    | 0.13    | 0.11    | 0.056 | 0.047 |   |
| 74  | K     | 0.07  | [6.2e-10,1]                                             | 0.13                    | 0.13    | 0.13    | 0.13    | 0.13    | 0.13    | 0.11    | 0.056 | 0.047 |   |
| 75  | D     | 0.093 | [6.2e-10,1]                                             | 0.13                    | 0.13    | 0.13    | 0.13    | 0.13    | 0.12    | 0.11    | 0.059 | 0.069 |   |
| 76  | P     | 0.22  | [6.2e-10,1]                                             | 0.1                     | 0.1     | 0.1     | 0.1     | 0.1     | 0.1     | 0.099   | 0.082 | 0.19  |   |
| 77  | E     | 0.11  | [6.2e-10,1]                                             | 0.13                    | 0.13    | 0.13    | 0.13    | 0.13    | 0.12    | 0.11    | 0.058 | 0.082 |   |
| 78  | H     | 0.84  | [0.054,1]                                               | 5.6e-10                 | 4e-07   | 1.8e-05 | 0.00027 | 0.0021  | 0.011   | 0.044   | 0.15  | 0.79  |   |
| 79  | A     | 0.15  | [6.2e-10,1]                                             | 0.12                    | 0.12    | 0.12    | 0.12    | 0.12    | 0.12    | 0.11    | 0.074 | 0.12  |   |
| 80  | H     | 0.13  | [6.2e-10,1]                                             | 0.12                    | 0.12    | 0.12    | 0.12    | 0.12    | 0.12    | 0.11    | 0.071 | 0.098 |   |
| 81  | R     | 0.87  | [0.054,1]                                               | 4.4e-10                 | 3.1e-07 | 1.4e-05 | 0.00021 | 0.0016  | 0.0086  | 0.035   | 0.13  | 0.83  |   |
| 82  | H     | 0.11  | [6.2e-10,1]                                             | 0.12                    | 0.12    | 0.12    | 0.12    | 0.12    | 0.12    | 0.11    | 0.071 | 0.087 |   |
| 83  | K     | 0.07  | [6.2e-10,1]                                             | 0.13                    | 0.13    | 0.13    | 0.13    | 0.13    | 0.13    | 0.11    | 0.056 | 0.047 |   |
| 84  | I     | 0.21  | [6.2e-10,1]                                             | 0.11                    | 0.11    | 0.11    | 0.11    | 0.11    | 0.11    | 0.1     | 0.081 | 0.18  |   |
| 85  | E     | 0.11  | [6.2e-10,1]                                             | 0.13                    | 0.13    | 0.13    | 0.13    | 0.13    | 0.12    | 0.11    | 0.058 | 0.082 |   |
| 86  | E     | 0.11  | [6.2e-10,1]                                             | 0.13                    | 0.13    | 0.13    | 0.13    | 0.13    | 0.12    | 0.11    | 0.058 | 0.082 |   |
| 87  | E     | 0.11  | [6.2e-10,1]                                             | 0.13                    | 0.13    | 0.13    | 0.13    | 0.13    | 0.12    | 0.11    | 0.058 | 0.082 |   |
| 88  | V     | 0.89  | [0.054,1]                                               | 3.6e-10                 | 2.5e-07 | 1.2e-05 | 0.00017 | 0.0013  | 0.007   | 0.029   | 0.11  | 0.85  |   |

|     |   |       |             |         |         |         |         |         |         |        |       |       |      |
|-----|---|-------|-------------|---------|---------|---------|---------|---------|---------|--------|-------|-------|------|
| 89  | A | 0.16  | [6.2e-10,1] | 0.11    | 0.11    | 0.11    | 0.11    | 0.11    | 0.11    | 0.11   | 0.11  | 0.077 | 0.13 |
| 90  | A | 0.15  | [6.2e-10,1] | 0.12    | 0.12    | 0.12    | 0.12    | 0.12    | 0.12    | 0.11   | 0.11  | 0.076 | 0.12 |
| 91  | A | 0.88  | [0.054,1]   | 4e-10   | 2.9e-07 | 1.3e-05 | 0.00019 | 0.0015  | 0.0079  | 0.032  | 0.12  | 0.84  |      |
| 92  | A | 0.98  | [0.26,1]    | 1.8e-12 | 1.2e-09 | 5.7e-08 | 8.7e-07 | 9.5e-06 | 0.00012 | 0.0017 | 0.031 | 0.97  |      |
| 93  | A | 0.16  | [6.2e-10,1] | 0.12    | 0.12    | 0.12    | 0.12    | 0.11    | 0.11    | 0.11   | 0.077 | 0.13  |      |
| 94  | V | 0.1   | [6.2e-10,1] | 0.13    | 0.13    | 0.13    | 0.13    | 0.12    | 0.12    | 0.11   | 0.069 | 0.073 |      |
| 95  | G | 0.11  | [6.2e-10,1] | 0.12    | 0.12    | 0.12    | 0.12    | 0.12    | 0.12    | 0.11   | 0.073 | 0.084 |      |
| 96  | A | 0.16  | [6.2e-10,1] | 0.12    | 0.12    | 0.12    | 0.12    | 0.11    | 0.11    | 0.11   | 0.077 | 0.13  |      |
| 97  | G | 0.064 | [6.2e-10,1] | 0.13    | 0.13    | 0.13    | 0.13    | 0.13    | 0.13    | 0.11   | 0.06  | 0.04  |      |
| 98  | G | 0.13  | [6.2e-10,1] | 0.12    | 0.12    | 0.12    | 0.12    | 0.12    | 0.12    | 0.11   | 0.076 | 0.1   |      |
| 99  | Y | 0.87  | [0.054,1]   | 4.5e-10 | 3.2e-07 | 1.5e-05 | 0.00022 | 0.0017  | 0.0089  | 0.036  | 0.13  | 0.82  |      |
| 100 | V | 0.12  | [6.2e-10,1] | 0.12    | 0.12    | 0.12    | 0.12    | 0.12    | 0.12    | 0.11   | 0.072 | 0.09  |      |
| 101 | F | 0.26  | [6.2e-10,1] | 0.099   | 0.099   | 0.099   | 0.099   | 0.099   | 0.098   | 0.095  | 0.083 | 0.23  |      |
| 102 | H | 0.11  | [6.2e-10,1] | 0.12    | 0.12    | 0.12    | 0.12    | 0.12    | 0.12    | 0.11   | 0.071 | 0.084 |      |
| 103 | E | 0.094 | [6.2e-10,1] | 0.13    | 0.13    | 0.13    | 0.13    | 0.13    | 0.12    | 0.11   | 0.059 | 0.07  |      |
| 104 | H | 0.12  | [6.2e-10,1] | 0.12    | 0.12    | 0.12    | 0.12    | 0.12    | 0.12    | 0.11   | 0.072 | 0.088 |      |
| 105 | H | 0.11  | [6.2e-10,1] | 0.12    | 0.12    | 0.12    | 0.12    | 0.12    | 0.12    | 0.11   | 0.071 | 0.084 |      |
| 106 | E | 0.74  | [0.013,1]   | 1.1e-09 | 7.9e-07 | 3.6e-05 | 0.00053 | 0.0041  | 0.021   | 0.082  | 0.22  | 0.68  |      |
| 107 | K | 0.064 | [6.2e-10,1] | 0.13    | 0.13    | 0.13    | 0.13    | 0.13    | 0.13    | 0.11   | 0.056 | 0.041 |      |
| 108 | K | 0.081 | [6.2e-10,1] | 0.13    | 0.13    | 0.13    | 0.13    | 0.13    | 0.12    | 0.11   | 0.06  | 0.057 |      |
| 109 | E | 0.26  | [6.2e-10,1] | 0.099   | 0.099   | 0.099   | 0.099   | 0.098   | 0.098   | 0.095  | 0.082 | 0.23  |      |
| 110 | S | 0.35  | [6.2e-10,1] | 0.086   | 0.086   | 0.086   | 0.086   | 0.086   | 0.086   | 0.085  | 0.081 | 0.32  |      |
| 111 | K | 0.25  | [6.2e-10,1] | 0.1     | 0.1     | 0.1     | 0.1     | 0.1     | 0.1     | 0.097  | 0.082 | 0.22  |      |
| 112 | E | 0.26  | [6.2e-10,1] | 0.099   | 0.099   | 0.099   | 0.099   | 0.098   | 0.098   | 0.095  | 0.082 | 0.23  |      |
| 113 | E | 0.26  | [6.2e-10,1] | 0.099   | 0.099   | 0.099   | 0.099   | 0.098   | 0.098   | 0.095  | 0.082 | 0.23  |      |
| 114 | E | 0.26  | [6.2e-10,1] | 0.099   | 0.099   | 0.099   | 0.099   | 0.098   | 0.098   | 0.095  | 0.082 | 0.23  |      |
| 115 | K | 0.26  | [6.2e-10,1] | 0.099   | 0.099   | 0.099   | 0.099   | 0.098   | 0.098   | 0.095  | 0.082 | 0.23  |      |
| 116 | E | 0.26  | [6.2e-10,1] | 0.099   | 0.099   | 0.099   | 0.099   | 0.098   | 0.098   | 0.095  | 0.082 | 0.23  |      |
| 117 | A | 0.31  | [6.2e-10,1] | 0.091   | 0.091   | 0.091   | 0.091   | 0.091   | 0.09    | 0.089  | 0.082 | 0.28  |      |
| 118 | E | 0.24  | [6.2e-10,1] | 0.1     | 0.1     | 0.1     | 0.1     | 0.1     | 0.1     | 0.097  | 0.082 | 0.21  |      |
| 119 | G | 0.31  | [6.2e-10,1] | 0.092   | 0.092   | 0.092   | 0.092   | 0.092   | 0.091   | 0.09   | 0.082 | 0.28  |      |
| 120 | K | 0.93  | [0.26,1]    | 2e-10   | 1.5e-07 | 6.7e-06 | 9.8e-05 | 0.00076 | 0.0041  | 0.017  | 0.076 | 0.9   |      |
| 121 | K | 0.24  | [6.2e-10,1] | 0.1     | 0.1     | 0.1     | 0.1     | 0.1     | 0.1     | 0.097  | 0.082 | 0.21  |      |
| 122 | H | 0.3   | [6.2e-10,1] | 0.093   | 0.093   | 0.093   | 0.093   | 0.093   | 0.092   | 0.091  | 0.082 | 0.27  |      |
| 123 | H | 0.3   | [6.2e-10,1] | 0.093   | 0.093   | 0.093   | 0.093   | 0.093   | 0.093   | 0.091  | 0.082 | 0.27  |      |
| 124 | H | 0.3   | [6.2e-10,1] | 0.093   | 0.093   | 0.093   | 0.093   | 0.093   | 0.093   | 0.091  | 0.082 | 0.27  |      |
| 125 | L | 0.35  | [6.2e-10,1] | 0.085   | 0.085   | 0.085   | 0.085   | 0.085   | 0.085   | 0.084  | 0.081 | 0.32  |      |
| 126 | F | 0.36  | [6.2e-10,1] | 0.084   | 0.084   | 0.084   | 0.084   | 0.084   | 0.084   | 0.083  | 0.081 | 0.33  |      |

Supplementary Table 5: Ka/Ks values per LP3-1 amino acid. First are represented amino acid position, then amino acid, w-score, confidence interval and Bayesian posterior probabilities.





|     |   |      |               |      |      |      |      |      |      |      |      |      |      |       |
|-----|---|------|---------------|------|------|------|------|------|------|------|------|------|------|-------|
| 89  | E | 0.23 | [6.2e-10,2.9] | 0.12 | 0.12 | 0.12 | 0.12 | 0.12 | 0.12 | 0.12 | 0.12 | 0.12 | 0.1  | 0.067 |
| 90  | E | 0.23 | [6.2e-10,2.9] | 0.12 | 0.12 | 0.12 | 0.12 | 0.12 | 0.12 | 0.12 | 0.12 | 0.12 | 0.1  | 0.067 |
| 91  | I | 0.37 | [6.2e-10,2.9] | 0.11 | 0.11 | 0.11 | 0.11 | 0.11 | 0.11 | 0.11 | 0.11 | 0.11 | 0.11 | 0.12  |
| 92  | A | 0.41 | [6.2e-10,2.9] | 0.11 | 0.11 | 0.11 | 0.11 | 0.11 | 0.11 | 0.11 | 0.11 | 0.11 | 0.1  | 0.13  |
| 93  | A | 0.41 | [6.2e-10,2.9] | 0.11 | 0.11 | 0.11 | 0.11 | 0.11 | 0.11 | 0.11 | 0.11 | 0.11 | 0.1  | 0.13  |
| 94  | A | 0.41 | [6.2e-10,2.9] | 0.11 | 0.11 | 0.11 | 0.11 | 0.11 | 0.11 | 0.11 | 0.11 | 0.11 | 0.1  | 0.13  |
| 95  | A | 0.35 | [6.2e-10,2.9] | 0.11 | 0.11 | 0.11 | 0.11 | 0.11 | 0.11 | 0.11 | 0.11 | 0.11 | 0.11 | 0.11  |
| 96  | A | 0.59 | [6.2e-10,2.9] | 0.1  | 0.1  | 0.1  | 0.1  | 0.1  | 0.1  | 0.1  | 0.1  | 0.1  | 0.1  | 0.19  |
| 97  | V | 0.59 | [6.2e-10,2.9] | 0.1  | 0.1  | 0.1  | 0.1  | 0.1  | 0.1  | 0.1  | 0.1  | 0.1  | 0.1  | 0.19  |
| 98  | G | 0.59 | [6.2e-10,2.9] | 0.1  | 0.1  | 0.1  | 0.1  | 0.1  | 0.1  | 0.1  | 0.1  | 0.1  | 0.1  | 0.19  |
| 99  | E | 0.59 | [6.2e-10,2.9] | 0.1  | 0.1  | 0.1  | 0.1  | 0.1  | 0.1  | 0.1  | 0.1  | 0.1  | 0.1  | 0.19  |
| 100 | G | 0.59 | [6.2e-10,2.9] | 0.1  | 0.1  | 0.1  | 0.1  | 0.1  | 0.1  | 0.1  | 0.1  | 0.1  | 0.1  | 0.19  |
| 101 | G | 0.59 | [6.2e-10,2.9] | 0.1  | 0.1  | 0.1  | 0.1  | 0.1  | 0.1  | 0.1  | 0.1  | 0.1  | 0.1  | 0.19  |

*Supplementary Table 6: Ka/Ks values per LP3-3 amino acid. First are represented amino acid position, then amino acid, w-score, confidence interval and Bayesian posterior probabilities.*

(a) ASR1

Selecton Bayesian Ka/Ks Results  
Displayed on sequence 1

| POS | AMINO | Ka/Ks | [Confidence Interval](+ if lower bound > 1) | POSTERIOR PROBABILITIES |         |         |         |         |         |         |         |         |
|-----|-------|-------|---------------------------------------------|-------------------------|---------|---------|---------|---------|---------|---------|---------|---------|
|     |       |       |                                             | w =                     | 0.00074 | 0.007   | 0.023   | 0.053   | 0.1     | 0.18    | 0.3     | 0.55    |
| 1   | M     | 0.025 | [0.00074,0.1]                               | 0.3                     | 0.27    | 0.21    | 0.13    | 0.064   | 0.021   | 0.0035  | 9.2e-05 | 1e-07   |
| 2   | E     | 0.17  | [0.023,0.55]                                | 6.2e-05                 | 0.0051  | 0.045   | 0.15    | 0.28    | 0.3     | 0.18    | 0.039   | 0.0016  |
| 3   | E     | 0.014 | [0.00074,0.053]                             | 0.39                    | 0.32    | 0.19    | 0.08    | 0.021   | 0.0034  | 0.00033 | 1.9e-05 | 1.2e-06 |
| 4   | E     | 0.014 | [0.00074,0.053]                             | 0.39                    | 0.32    | 0.19    | 0.08    | 0.021   | 0.0034  | 0.00033 | 1.9e-05 | 1.2e-06 |
| 5   | K     | 0.051 | [0.007,0.18]                                | 0.018                   | 0.15    | 0.31    | 0.31    | 0.17    | 0.045   | 0.0051  | 0.00011 | 1.4e-06 |
| 6   | H     | 0.097 | [0.023,0.3]                                 | 0.00022                 | 0.017   | 0.13    | 0.31    | 0.34    | 0.17    | 0.037   | 0.0019  | 4.8e-05 |
| 7   | H     | 0.016 | [0.00074,0.1]                               | 0.37                    | 0.31    | 0.2     | 0.092   | 0.028   | 0.0048  | 0.0004  | 7.9e-06 | 1.2e-07 |
| 8   | H     | 0.015 | [0.00074,0.1]                               | 0.37                    | 0.31    | 0.2     | 0.087   | 0.024   | 0.0039  | 0.00028 | 4.8e-06 | 7.1e-08 |
| 9   | H     | 0.015 | [0.00074,0.1]                               | 0.37                    | 0.31    | 0.2     | 0.087   | 0.024   | 0.0039  | 0.00028 | 4.8e-06 | 7.1e-08 |
| 10  | H     | 0.21  | [0.023,0.55]                                | 3.6e-05                 | 0.003   | 0.028   | 0.1     | 0.22    | 0.3     | 0.25    | 0.089   | 0.0049  |
| 11  | L     | 0.32  | [0.1,0.55]                                  | 8.4e-08                 | 7e-05   | 0.0022  | 0.02    | 0.09    | 0.24    | 0.38    | 0.25    | 0.014   |
| 12  | F     | 0.69  | [0.3,1]                                     | 6.8e-18                 | 8e-12   | 1.9e-08 | 3.9e-06 | 0.00022 | 0.0055  | 0.072   | 0.57    | 0.35    |
| 13  | H     | 0.015 | [0.00074,0.1]                               | 0.37                    | 0.31    | 0.2     | 0.087   | 0.024   | 0.0039  | 0.00028 | 4.8e-06 | 7.1e-08 |
| 14  | H     | 0.22  | [0.053,0.55]                                | 6.5e-09                 | 4.7e-05 | 0.0038  | 0.051   | 0.22    | 0.38    | 0.28    | 0.067   | 0.0078  |
| 15  | K     | 0.015 | [0.00074,0.1]                               | 0.37                    | 0.31    | 0.2     | 0.087   | 0.024   | 0.0037  | 0.00024 | 2.6e-06 | 2e-08   |
| 16  | D     | 0.22  | [0.053,0.55]                                | 1.1e-08                 | 7.8e-05 | 0.0058  | 0.067   | 0.24    | 0.35    | 0.25    | 0.08    | 0.0093  |
| 17  | K     | 0.27  | [0.053,0.55]                                | 2.5e-09                 | 1.9e-05 | 0.0017  | 0.026   | 0.14    | 0.33    | 0.35    | 0.13    | 0.015   |
| 18  | A     | 0.11  | [0.023,0.3]                                 | 0.00025                 | 0.019   | 0.13    | 0.29    | 0.31    | 0.17    | 0.059   | 0.012   | 0.0013  |
| 19  | E     | 0.35  | [0.053,1]                                   | 3.1e-07                 | 0.00024 | 0.0064  | 0.044   | 0.14    | 0.24    | 0.26    | 0.23    | 0.081   |
| 20  | E     | 0.9   | [0.55,1]                                    | 5.1e-21                 | 4.4e-14 | 2.4e-10 | 9.1e-08 | 8.8e-06 | 0.00038 | 0.0097  | 0.22    | 0.77    |
| 21  | G     | 0.83  | [0.3,1]                                     | 3.2e-20                 | 2.8e-13 | 1.6e-09 | 5.7e-07 | 4.7e-05 | 0.0015  | 0.026   | 0.34    | 0.63    |
| 22  | P     | 0.77  | [0.3,1]                                     | 2.3e-16                 | 1.6e-10 | 1.8e-07 | 1.9e-05 | 0.00056 | 0.0075  | 0.06    | 0.4     | 0.53    |
| 23  | V     | 0.47  | [0.18,1]                                    | 1.2e-12                 | 8.6e-08 | 2.9e-05 | 0.0012  | 0.017   | 0.11    | 0.33    | 0.44    | 0.11    |
| 24  | D     | 0.55  | [0.1,1]                                     | 5.6e-12                 | 3.8e-07 | 9.8e-05 | 0.0028  | 0.023   | 0.092   | 0.23    | 0.43    | 0.22    |
| 25  | Y     | 0.096 | [0.023,0.3]                                 | 0.00021                 | 0.017   | 0.12    | 0.31    | 0.34    | 0.18    | 0.033   | 0.00079 | 6.9e-06 |
| 26  | E     | 0.27  | [0.053,1]                                   | 4.3e-09                 | 3.1e-05 | 0.0026  | 0.036   | 0.17    | 0.33    | 0.31    | 0.13    | 0.028   |
| 27  | K     | 0.016 | [0.00074,0.1]                               | 0.36                    | 0.31    | 0.2     | 0.093   | 0.028   | 0.0048  | 0.00037 | 4.8e-06 | 2.8e-08 |
| 28  | E     | 0.014 | [0.00074,0.1]                               | 0.38                    | 0.32    | 0.19    | 0.082   | 0.022   | 0.0037  | 0.00037 | 2.1e-05 | 1.3e-06 |
| 29  | I     | 0.41  | [0.1,1]                                     | 5.8e-12                 | 4.3e-07 | 0.00014 | 0.0051  | 0.052   | 0.2     | 0.34    | 0.29    | 0.11    |
| 30  | K     | 0.015 | [0.00074,0.1]                               | 0.37                    | 0.31    | 0.2     | 0.088   | 0.025   | 0.0038  | 0.00026 | 3e-06   | 2.3e-08 |
| 31  | H     | 0.056 | [0.007,0.18]                                | 0.016                   | 0.13    | 0.29    | 0.31    | 0.18    | 0.058   | 0.0088  | 0.00036 | 7.1e-06 |
| 32  | H     | 0.016 | [0.00074,0.1]                               | 0.36                    | 0.31    | 0.2     | 0.095   | 0.03    | 0.0057  | 0.00053 | 1.2e-05 | 1.5e-07 |
| 33  | K     | 0.015 | [0.00074,0.1]                               | 0.37                    | 0.31    | 0.2     | 0.088   | 0.025   | 0.0038  | 0.00026 | 3e-06   | 2.3e-08 |
| 34  | H     | 0.016 | [0.00074,0.1]                               | 0.37                    | 0.31    | 0.2     | 0.092   | 0.028   | 0.0048  | 0.0004  | 7.8e-06 | 9.9e-08 |
| 35  | L     | 0.49  | [0.18,1]                                    | 7.9e-13                 | 5.9e-08 | 2e-05   | 0.00088 | 0.013   | 0.085   | 0.3     | 0.48    | 0.12    |
| 36  | E     | 0.052 | [0.007,0.18]                                | 0.019                   | 0.15    | 0.31    | 0.3     | 0.16    | 0.048   | 0.0086  | 0.001   | 0.0001  |
| 37  | Q     | 0.099 | [0.023,0.3]                                 | 0.00022                 | 0.017   | 0.12    | 0.3     | 0.33    | 0.18    | 0.042   | 0.0026  | 6.5e-05 |
| 38  | I     | 0.11  | [0.007,0.3]                                 | 0.0062                  | 0.055   | 0.15    | 0.24    | 0.26    | 0.19    | 0.086   | 0.012   | 0.00018 |
| 39  | G     | 0.018 | [0.00074,0.1]                               | 0.34                    | 0.3     | 0.21    | 0.11    | 0.037   | 0.0078  | 0.00078 | 1.3e-05 | 3e-08   |
| 40  | K     | 0.2   | [0.053,0.55]                                | 7.1e-07                 | 0.00056 | 0.015   | 0.099   | 0.26    | 0.33    | 0.21    | 0.07    | 0.0097  |
| 41  | L     | 0.41  | [0.1,1]                                     | 2.9e-10                 | 2.2e-06 | 0.00023 | 0.0045  | 0.036   | 0.15    | 0.36    | 0.4     | 0.054   |
| 42  | G     | 0.017 | [0.00074,0.1]                               | 0.35                    | 0.3     | 0.2     | 0.099   | 0.032   | 0.0058  | 0.00045 | 5e-06   | 1e-08   |
| 43  | T     | 0.087 | [0.007,0.3]                                 | 0.0091                  | 0.078   | 0.2     | 0.28    | 0.25    | 0.14    | 0.048   | 0.0056  | 0.00015 |
| 44  | V     | 0.53  | [0.18,1]                                    | 4.2e-15                 | 2.9e-09 | 3e-06   | 0.00027 | 0.0061  | 0.057   | 0.26    | 0.53    | 0.14    |
| 45  | A     | 0.025 | [0.00074,0.1]                               | 0.3                     | 0.27    | 0.21    | 0.13    | 0.06    | 0.02    | 0.0037  | 0.00019 | 2e-06   |
| 46  | A     | 0.021 | [0.00074,0.1]                               | 0.33                    | 0.29    | 0.21    | 0.12    | 0.046   | 0.012   | 0.0016  | 5e-05   | 4.2e-07 |
| 47  | G     | 0.028 | [0.00074,0.18]                              | 0.29                    | 0.26    | 0.21    | 0.14    | 0.071   | 0.026   | 0.0058  | 0.00033 | 2.2e-06 |
| 48  | A     | 0.021 | [0.00074,0.1]                               | 0.33                    | 0.29    | 0.21    | 0.12    | 0.046   | 0.012   | 0.0016  | 5e-05   | 4.2e-07 |
| 49  | Y     | 0.14  | [0.023,0.3]                                 | 8.7e-05                 | 0.0072  | 0.06    | 0.19    | 0.31    | 0.28    | 0.14    | 0.019   | 0.00044 |
| 50  | A     | 0.026 | [0.00074,0.18]                              | 0.3                     | 0.27    | 0.21    | 0.13    | 0.065   | 0.023   | 0.0049  | 0.0003  | 3.2e-06 |
| 51  | L     | 0.033 | [0.00074,0.18]                              | 0.27                    | 0.25    | 0.21    | 0.15    | 0.084   | 0.036   | 0.0095  | 0.00067 | 4.6e-06 |
| 52  | H     | 0.11  | [0.023,0.3]                                 | 0.00016                 | 0.013   | 0.097   | 0.26    | 0.34    | 0.22    | 0.064   | 0.0038  | 3.5e-05 |
| 53  | E     | 0.014 | [0.00074,0.053]                             | 0.39                    | 0.32    | 0.19    | 0.078   | 0.02    | 0.0032  | 0.00031 | 1.8e-05 | 1.2e-06 |
| 54  | K     | 0.015 | [0.00074,0.1]                               | 0.37                    | 0.31    | 0.2     | 0.088   | 0.025   | 0.0038  | 0.00026 | 3e-06   | 2.3e-08 |
| 55  | H     | 0.016 | [0.00074,0.1]                               | 0.37                    | 0.31    | 0.2     | 0.092   | 0.028   | 0.0048  | 0.0004  | 7.8e-06 | 9.9e-08 |
| 56  | E     | 0.098 | [0.023,0.3]                                 | 0.00027                 | 0.02    | 0.14    | 0.31    | 0.32    | 0.16    | 0.044   | 0.0057  | 0.00043 |
| 57  | A     | 0.024 | [0.00074,0.1]                               | 0.31                    | 0.28    | 0.21    | 0.13    | 0.059   | 0.019   | 0.0034  | 0.00016 | 1.6e-06 |
| 58  | K     | 0.091 | [0.023,0.3]                                 | 0.00026                 | 0.02    | 0.14    | 0.32    | 0.33    | 0.16    | 0.03    | 0.0011  | 2e-05   |
| 59  | K     | 0.016 | [0.00074,0.1]                               | 0.36                    | 0.31    | 0.2     | 0.093   | 0.028   | 0.0048  | 0.00037 | 4.8e-06 | 2.8e-08 |
| 60  | D     | 0.013 | [0.00074,0.053]                             | 0.4                     | 0.32    | 0.19    | 0.072   | 0.017   | 0.0026  | 0.00026 | 2.2e-05 | 2e-06   |
| 61  | P     | 0.32  | [0.053,0.55]                                | 1e-07                   | 8.5e-05 | 0.0026  | 0.023   | 0.098   | 0.25    | 0.37    | 0.24    | 0.018   |
| 62  | E     | 0.053 | [0.007,0.18]                                | 0.019                   | 0.15    | 0.31    | 0.3     | 0.16    | 0.05    | 0.0092  | 0.00094 | 7.9e-05 |
| 63  | H     | 0.056 | [0.007,0.18]                                | 0.016                   | 0.13    | 0.29    | 0.31    | 0.19    | 0.059   | 0.0085  | 0.00029 | 5e-06   |
| 64  | A     | 0.36  | [0.1,1]                                     | 6.6e-10                 | 5.1e-06 | 0.0005  | 0.0089  | 0.062   | 0.21    | 0.39    | 0.29    | 0.042   |
| 65  | H     | 0.016 | [0.00074,0.1]                               | 0.37                    | 0.31    | 0.2     | 0.091   | 0.027   | 0.0046  | 0.00037 | 6.8e-06 | 8.1e-08 |
| 66  | K     | 0.33  | [0.1,1]                                     | 1e-09                   | 7.8e-06 | 0.00071 | 0.012   | 0.082   | 0.26    | 0.39    | 0.21    | 0.037   |
| 67  | H     | 0.015 | [0.00074,0.1]                               | 0.37                    | 0.31    | 0.2     | 0.087   | 0.024   | 0.0039  | 0.00028 | 4.8e-06 | 7.1e-08 |
| 68  | K     | 0.014 | [0.00074,0.1]                               | 0.38                    | 0.32    | 0.2     | 0.083   | 0.022   | 0.0031  | 0.00018 | 1.7e-06 | 1.6e-08 |
| 69  | I     | 0.15  | [0.023,0.3]                                 | 7.4e-05                 | 0.0062  | 0.053   | 0.17    | 0.3     | 0.3     | 0.15    | 0.018   | 0.00018 |
| 70  | E     | 0.093 | [0.023,0.3]                                 | 0.00029                 | 0.022   | 0.15    | 0.32    | 0.31    | 0.15    | 0.037   | 0.0037  | 0.00025 |
| 71  | E     | 0.014 | [0.00074,0.1]                               | 0.39                    | 0.32    | 0.19    | 0.08    | 0.021   | 0.0035  | 0.00034 | 2e-05   | 1.3e-06 |
| 72  | E     | 0.014 | [0.00074,0.053]                             | 0.39                    | 0.32    | 0.19    | 0.08    | 0.021   | 0.0034  | 0.00033 | 1.9e-05 | 1.2e-06 |
| 73  | I     | 0.25  | [0.053,0.55]                                | 3.3e-07                 | 0.00026 | 0.0074  | 0.055   | 0.18    | 0.32    | 0.3     | 0.12    | 0.013   |
| 74  | A     | 0.1   | [0.007,0.3]                                 | 0.0071                  | 0.062   | 0.16    | 0.25    | 0.26    | 0.18    | 0.073   | 0.011   | 0.0003  |
| 75  | A     | 0.025 | [0.00074,0.18]                              | 0.3                     | 0.27    | 0.21    | 0.13    | 0.062   | 0.021   | 0.0041  | 0.00021 | 2.1e-06 |
| 76  | A     | 0.08  | [0.007,0.3]                                 | 0.0098                  | 0.084   | 0.21    | 0.29    | 0.24    | 0.13    | 0.035   | 0.0024  | 3.2e-05 |
| 77  | A     | 0.3   | [0.053,0.55]                                | 1.4e-07                 | 0.00011 | 0.0035  | 0.03    | 0.12    | 0.27    | 0.35    | 0.2     | 0.022   |
| 78  | A     | 0.082 | [0.007,0.3]                                 | 0.0094                  | 0.081   | 0.2     | 0.28    | 0.25    | 0.13    | 0.039   | 0.0031  | 4.8e-05 |
| 79  | V     | 0.16  | [0.023,0.55]                                | 7.4e-05                 | 0.0061  | 0.052   | 0.17    | 0.29    | 0.29    | 0.16    | 0.028   | 0.0007  |
| 80  | G     | 0.017 | [0.00074,0.1]                               | 0.35                    | 0.3     | 0.2     | 0.1     | 0.033   | 0.0064  | 0.00056 | 9.2e-06 | 3.3e-08 |
| 81  | A     | 0.26  | [0.053,0.55]                                | 3.2e-07                 | 0.00025 | 0.0071  | 0.052   | 0.17    | 0.31    | 0.3     | 0.14    | 0.017   |
| 82  | G     | 0.16  | [0.023,0.55]                                | 6.7e-05                 | 0.0055  | 0.048   | 0.16    | 0.29    | 0.3     | 0.17    | 0.027   | 0.00044 |
| 83  | G     | 0.019 | [0.00074,0.1]                               | 0.34                    | 0.3     | 0.21    | 0.11    | 0.038   | 0.0084  | 0.00087 | 1.6e-05 | 4.3e-08 |
| 84  | F     | 0.28  | [0.053,0.55]                                | 1.5e-05                 | 0.0013  | 0.013   | 0.055   | 0.14    | 0.26    | 0.32    | 0.2     | 0.017   |
| 85  | A     | 0.24  | [0.053,0.55]                                | 3.3e-07                 | 0.00026 | 0.0074  | 0.055   | 0.18    | 0.32    | 0.31    | 0.12    | 0.0092  |
| 86  | F     | 0.12  | [0.007,0.3]                                 | 0.0053                  | 0.048   | 0.13    | 0.22    | 0.26    | 0.21    | 0.1     | 0.015   | 0.00015 |
| 87  | H     | 0.018 | [0.00074,0.1]                               | 0.35                    | 0.3     | 0.2     | 0.1     | 0.035   | 0.0075  | 0.0008  | 1.9e-05 | 1.6e-07 |
| 88  | E     | 0.014 | [0.00074,0.053]                             | 0.39                    | 0.32    | 0.19    | 0.079   | 0.021   | 0.0033  | 0.00032 | 1.9e-05 | 1.3e-06 |

|     |   |       |                 |         |         |         |       |        |        |         |         |         |
|-----|---|-------|-----------------|---------|---------|---------|-------|--------|--------|---------|---------|---------|
| 89  | H | 0.018 | [0.00074,0.1]   | 0.35    | 0.3     | 0.2     | 0.1   | 0.035  | 0.0075 | 0.0008  | 1.9e-05 | 1.6e-07 |
| 90  | H | 0.019 | [0.00074,0.1]   | 0.34    | 0.29    | 0.21    | 0.11  | 0.041  | 0.0099 | 0.0012  | 3.3e-05 | 2.4e-07 |
| 91  | E | 0.014 | [0.00074,0.053] | 0.39    | 0.32    | 0.19    | 0.08  | 0.021  | 0.0034 | 0.00033 | 1.9e-05 | 1.2e-06 |
| 92  | K | 0.015 | [0.00074,0.1]   | 0.37    | 0.31    | 0.2     | 0.088 | 0.025  | 0.0038 | 0.00026 | 3e-06   | 2.3e-08 |
| 93  | K | 0.015 | [0.00074,0.1]   | 0.37    | 0.31    | 0.2     | 0.088 | 0.025  | 0.0038 | 0.00026 | 3e-06   | 2.3e-08 |
| 94  | D | 0.33  | [0.1,1]         | 2.8e-11 | 1.8e-06 | 0.00047 | 0.013 | 0.095  | 0.27   | 0.35    | 0.22    | 0.044   |
| 95  | A | 0.068 | [0.007,0.18]    | 0.013   | 0.11    | 0.25    | 0.3   | 0.22   | 0.092  | 0.02    | 0.0014  | 3.9e-05 |
| 96  | K | 0.097 | [0.023,0.3]     | 0.00023 | 0.018   | 0.13    | 0.31  | 0.33   | 0.17   | 0.04    | 0.0028  | 0.00013 |
| 97  | K | 0.1   | [0.023,0.3]     | 0.00019 | 0.015   | 0.11    | 0.28  | 0.34   | 0.2    | 0.053   | 0.0035  | 9.1e-05 |
| 98  | E | 0.15  | [0.023,0.55]    | 1.9e-06 | 0.0014  | 0.033   | 0.17  | 0.34   | 0.3    | 0.13    | 0.025   | 0.0028  |
| 99  | E | 0.22  | [0.053,0.55]    | 6.4e-07 | 0.0005  | 0.013   | 0.085 | 0.23   | 0.33   | 0.25    | 0.083   | 0.01    |
| 100 | K | 0.28  | [0.1,0.55]      | 1e-09   | 7.9e-06 | 0.00082 | 0.016 | 0.11   | 0.31   | 0.4     | 0.15    | 0.013   |
| 101 | K | 0.099 | [0.023,0.3]     | 0.00027 | 0.02    | 0.14    | 0.31  | 0.31   | 0.16   | 0.046   | 0.0065  | 0.00054 |
| 102 | A | 0.26  | [0.053,0.55]    | 2.1e-07 | 0.00017 | 0.0051  | 0.041 | 0.15   | 0.31   | 0.34    | 0.14    | 0.0093  |
| 103 | E | 0.52  | [0.18,1]        | 1.2e-17 | 8.4e-11 | 3e-07   | 5e-05 | 0.0026 | 0.04   | 0.25    | 0.59    | 0.12    |
| 104 | G | 0.032 | [0.00074,0.18]  | 0.27    | 0.25    | 0.21    | 0.14  | 0.082  | 0.035  | 0.0095  | 0.00077 | 8.5e-06 |
| 105 | G | 0.28  | [0.053,1]       | 3e-07   | 0.00024 | 0.0067  | 0.049 | 0.16   | 0.29   | 0.3     | 0.16    | 0.031   |
| 106 | H | 0.13  | [0.023,0.3]     | 0.00012 | 0.0099  | 0.079   | 0.22  | 0.32   | 0.25   | 0.1     | 0.015   | 0.00094 |
| 107 | H | 0.019 | [0.00074,0.1]   | 0.34    | 0.3     | 0.21    | 0.11  | 0.039  | 0.0087 | 0.001   | 3.3e-05 | 7.4e-07 |
| 108 | H | 0.021 | [0.00074,0.1]   | 0.33    | 0.29    | 0.21    | 0.12  | 0.047  | 0.013  | 0.0018  | 7e-05   | 1.1e-06 |
| 109 | L | 0.12  | [0.007,0.3]     | 0.005   | 0.045   | 0.13    | 0.22  | 0.26   | 0.21   | 0.11    | 0.021   | 0.00044 |
| 110 | F | 0.051 | [0.00074,0.3]   | 0.22    | 0.21    | 0.19    | 0.16  | 0.11   | 0.069  | 0.031   | 0.0065  | 0.00022 |

Supplementary Table 7: Ka/Ks values per ASRI amino acid. First are represented amino acid position, then amino acid, w-score, confidence interval and Bayesian posterior probabilities.

(b) ASR2

Selecton Bayesian Ka/Ks Results  
Displayed on sequence 1

| POS | AMINO | Ka/Ks | [Confidence Interval]( <sup>*</sup> if lower bound > 1) | w =     |         |         |                         |        |       |        |         |         |  |  |  |  |  |  |  |
|-----|-------|-------|---------------------------------------------------------|---------|---------|---------|-------------------------|--------|-------|--------|---------|---------|--|--|--|--|--|--|--|
|     |       |       |                                                         | 0.0012  | 0.0097  | 0.03    | POSTERIOR PROBABILITIES |        |       |        |         |         |  |  |  |  |  |  |  |
|     |       |       |                                                         | 0.064   | 0.12    | 0.2     | 0.32                    | 0.57   | 1     |        |         |         |  |  |  |  |  |  |  |
| 1   | M     | 0.041 | [0.0012, 0.2]                                           | 0.27    | 0.25    | 0.2     | 0.14                    | 0.086  | 0.041 | 0.013  | 0.0013  | 3.6e-06 |  |  |  |  |  |  |  |
| 2   | A     | 0.31  | [0.064, 0.57]                                           | 3.1e-05 | 0.002   | 0.016   | 0.059                   | 0.14   | 0.23  | 0.3    | 0.24    | 0.0095  |  |  |  |  |  |  |  |
| 3   | E     | 0.026 | [0.0012, 0.12]                                          | 0.34    | 0.29    | 0.2     | 0.11                    | 0.045  | 0.015 | 0.0046 | 0.0013  | 4.6e-05 |  |  |  |  |  |  |  |
| 4   | E     | 0.026 | [0.0012, 0.12]                                          | 0.34    | 0.29    | 0.2     | 0.11                    | 0.044  | 0.015 | 0.0044 | 0.0012  | 4.2e-05 |  |  |  |  |  |  |  |
| 5   | K     | 0.096 | [0.0097, 0.32]                                          | 0.013   | 0.097   | 0.21    | 0.27                    | 0.22   | 0.13  | 0.048  | 0.01    | 0.0002  |  |  |  |  |  |  |  |
| 6   | H     | 0.21  | [0.03, 0.57]                                            | 0.00011 | 0.0066  | 0.047   | 0.14                    | 0.24   | 0.27  | 0.2    | 0.093   | 0.0033  |  |  |  |  |  |  |  |
| 7   | Q     | 0.17  | [0.0012, 0.57]                                          | 0.13    | 0.13    | 0.13    | 0.13                    | 0.12   | 0.12  | 0.12   | 0.12    | 0.0098  |  |  |  |  |  |  |  |
| 8   | H     | 0.16  | [0.0012, 0.57]                                          | 0.13    | 0.13    | 0.13    | 0.13                    | 0.12   | 0.12  | 0.12   | 0.12    | 0.0093  |  |  |  |  |  |  |  |
| 9   | H     | 0.03  | [0.0012, 0.2]                                           | 0.31    | 0.28    | 0.2     | 0.12                    | 0.058  | 0.021 | 0.0053 | 0.00081 | 1.6e-05 |  |  |  |  |  |  |  |
| 10  | H     | 0.029 | [0.0012, 0.2]                                           | 0.32    | 0.28    | 0.2     | 0.12                    | 0.056  | 0.019 | 0.0048 | 0.00073 | 1.4e-05 |  |  |  |  |  |  |  |
| 11  | H     | 0.03  | [0.0012, 0.2]                                           | 0.31    | 0.28    | 0.2     | 0.12                    | 0.058  | 0.021 | 0.0053 | 0.00081 | 1.6e-05 |  |  |  |  |  |  |  |
| 12  | L     | 0.06  | [0.0012, 0.32]                                          | 0.23    | 0.21    | 0.19    | 0.15                    | 0.11   | 0.068 | 0.034  | 0.0092  | 0.00014 |  |  |  |  |  |  |  |
| 13  | F     | 0.19  | [0.0097, 0.57]                                          | 0.0043  | 0.034   | 0.092   | 0.16                    | 0.22   | 0.23  | 0.18   | 0.079   | 0.0011  |  |  |  |  |  |  |  |
| 14  | H     | 0.029 | [0.0012, 0.2]                                           | 0.32    | 0.28    | 0.2     | 0.12                    | 0.056  | 0.019 | 0.0048 | 0.00073 | 1.4e-05 |  |  |  |  |  |  |  |
| 15  | H     | 0.029 | [0.0012, 0.2]                                           | 0.32    | 0.28    | 0.2     | 0.12                    | 0.056  | 0.019 | 0.0048 | 0.00073 | 1.4e-05 |  |  |  |  |  |  |  |
| 16  | K     | 0.035 | [0.0012, 0.2]                                           | 0.3     | 0.26    | 0.2     | 0.13                    | 0.068  | 0.028 | 0.0089 | 0.002   | 5.9e-05 |  |  |  |  |  |  |  |
| 17  | N     | 0.25  | [0.03, 0.57]                                            | 8e-05   | 0.005   | 0.036   | 0.11                    | 0.2    | 0.25  | 0.23   | 0.15    | 0.0075  |  |  |  |  |  |  |  |
| 18  | K     | 0.56  | [0.2, 1]                                                | 3.8e-11 | 1.8e-07 | 1.7e-05 | 0.0004                  | 0.0047 | 0.034 | 0.17   | 0.68    | 0.11    |  |  |  |  |  |  |  |
| 19  | E     | 0.3   | [0.03, 0.57]                                            | 5.3e-05 | 0.0033  | 0.025   | 0.081                   | 0.16   | 0.22  | 0.25   | 0.25    | 0.017   |  |  |  |  |  |  |  |
| 20  | D     | 0.23  | [0.03, 0.57]                                            | 0.00015 | 0.0087  | 0.057   | 0.15                    | 0.23   | 0.23  | 0.18   | 0.14    | 0.01    |  |  |  |  |  |  |  |
| 21  | E     | 0.38  | [0.12, 0.57]                                            | 5.5e-08 | 4.5e-05 | 0.0017  | 0.018                   | 0.08   | 0.2   | 0.33   | 0.35    | 0.022   |  |  |  |  |  |  |  |
| 22  | G     | 0.55  | [0.2, 1]                                                | 1.5e-10 | 6.8e-07 | 5.4e-05 | 0.001                   | 0.0088 | 0.048 | 0.19   | 0.63    | 0.12    |  |  |  |  |  |  |  |
| 23  | G     | 0.36  | [0.064, 0.57]                                           | 2.9e-07 | 0.00015 | 0.0036  | 0.025                   | 0.093  | 0.21  | 0.32   | 0.32    | 0.02    |  |  |  |  |  |  |  |
| 24  | P     | 0.3   | [0.064, 0.57]                                           | 3.2e-05 | 0.0021  | 0.017   | 0.062                   | 0.14   | 0.24  | 0.3    | 0.23    | 0.0078  |  |  |  |  |  |  |  |
| 25  | V     | 0.5   | [0.2, 1]                                                | 4.2e-10 | 1.9e-06 | 0.00014 | 0.0024                  | 0.018  | 0.079 | 0.25   | 0.58    | 0.073   |  |  |  |  |  |  |  |
| 26  | D     | 0.39  | [0.064, 1]                                              | 5.2e-07 | 0.00026 | 0.0054  | 0.032                   | 0.093  | 0.18  | 0.27   | 0.38    | 0.038   |  |  |  |  |  |  |  |
| 27  | Y     | 0.031 | [0.0012, 0.2]                                           | 0.31    | 0.27    | 0.21    | 0.13                    | 0.063  | 0.022 | 0.0049 | 0.00034 | 1.8e-06 |  |  |  |  |  |  |  |
| 28  | E     | 0.32  | [0.064, 0.57]                                           | 8.3e-07 | 0.00041 | 0.0084  | 0.048                   | 0.14   | 0.24  | 0.29   | 0.26    | 0.015   |  |  |  |  |  |  |  |
| 29  | K     | 0.026 | [0.0012, 0.12]                                          | 0.33    | 0.29    | 0.2     | 0.11                    | 0.048  | 0.015 | 0.0029 | 0.00031 | 5.8e-06 |  |  |  |  |  |  |  |
| 30  | E     | 0.027 | [0.0012, 0.12]                                          | 0.34    | 0.29    | 0.2     | 0.11                    | 0.046  | 0.016 | 0.0047 | 0.0013  | 4.6e-05 |  |  |  |  |  |  |  |
| 31  | V     | 0.25  | [0.03, 0.57]                                            | 0.00013 | 0.0076  | 0.05    | 0.13                    | 0.21   | 0.23  | 0.2    | 0.16    | 0.01    |  |  |  |  |  |  |  |
| 32  | K     | 0.025 | [0.0012, 0.12]                                          | 0.34    | 0.29    | 0.2     | 0.11                    | 0.044  | 0.013 | 0.0024 | 0.00025 | 4.7e-06 |  |  |  |  |  |  |  |
| 33  | H     | 0.029 | [0.0012, 0.2]                                           | 0.32    | 0.28    | 0.2     | 0.12                    | 0.057  | 0.02  | 0.005  | 0.00075 | 1.4e-05 |  |  |  |  |  |  |  |
| 34  | H     | 0.029 | [0.0012, 0.2]                                           | 0.32    | 0.28    | 0.2     | 0.12                    | 0.056  | 0.019 | 0.0048 | 0.00073 | 1.4e-05 |  |  |  |  |  |  |  |
| 35  | S     | 0.22  | [0.03, 0.57]                                            | 0.00014 | 0.0086  | 0.058   | 0.15                    | 0.23   | 0.23  | 0.18   | 0.13    | 0.0079  |  |  |  |  |  |  |  |
| 36  | H     | 0.03  | [0.0012, 0.2]                                           | 0.31    | 0.27    | 0.2     | 0.12                    | 0.059  | 0.022 | 0.0056 | 0.00085 | 1.6e-05 |  |  |  |  |  |  |  |
| 37  | L     | 0.34  | [0.064, 0.57]                                           | 1.3e-05 | 0.00091 | 0.0084  | 0.037                   | 0.11   | 0.22  | 0.33   | 0.29    | 0.0093  |  |  |  |  |  |  |  |
| 38  | E     | 0.026 | [0.0012, 0.12]                                          | 0.34    | 0.29    | 0.2     | 0.11                    | 0.044  | 0.015 | 0.0044 | 0.0012  | 4.2e-05 |  |  |  |  |  |  |  |
| 39  | K     | 0.32  | [0.064, 0.57]                                           | 5.6e-07 | 0.00029 | 0.0063  | 0.04                    | 0.13   | 0.24  | 0.31   | 0.26    | 0.014   |  |  |  |  |  |  |  |
| 40  | I     | 0.16  | [0.0097, 0.57]                                          | 0.0055  | 0.043   | 0.11    | 0.19                    | 0.23   | 0.22  | 0.15   | 0.052   | 0.00077 |  |  |  |  |  |  |  |
| 41  | G     | 0.03  | [0.0012, 0.2]                                           | 0.31    | 0.27    | 0.2     | 0.13                    | 0.06   | 0.021 | 0.0044 | 0.00034 | 4e-06   |  |  |  |  |  |  |  |
| 42  | E     | 0.15  | [0.0097, 0.57]                                          | 0.0076  | 0.058   | 0.14    | 0.22                    | 0.23   | 0.18  | 0.11   | 0.052   | 0.0022  |  |  |  |  |  |  |  |
| 43  | L     | 0.19  | [0.0097, 0.57]                                          | 0.0042  | 0.033   | 0.09    | 0.16                    | 0.21   | 0.23  | 0.18   | 0.085   | 0.0017  |  |  |  |  |  |  |  |
| 44  | G     | 0.028 | [0.0012, 0.12]                                          | 0.32    | 0.28    | 0.2     | 0.12                    | 0.054  | 0.017 | 0.0033 | 0.00021 | 2e-06   |  |  |  |  |  |  |  |
| 45  | A     | 0.13  | [0.0097, 0.57]                                          | 0.0079  | 0.06    | 0.15    | 0.22                    | 0.24   | 0.19  | 0.1    | 0.029   | 0.00058 |  |  |  |  |  |  |  |
| 46  | V     | 0.37  | [0.12, 0.57]                                            | 2.2e-07 | 0.00012 | 0.0028  | 0.021                   | 0.081  | 0.2   | 0.33   | 0.35    | 0.017   |  |  |  |  |  |  |  |
| 47  | A     | 0.04  | [0.0012, 0.2]                                           | 0.27    | 0.25    | 0.2     | 0.14                    | 0.083  | 0.039 | 0.013  | 0.0021  | 2.7e-05 |  |  |  |  |  |  |  |
| 48  | A     | 0.04  | [0.0012, 0.2]                                           | 0.27    | 0.25    | 0.2     | 0.14                    | 0.083  | 0.039 | 0.013  | 0.0021  | 2.7e-05 |  |  |  |  |  |  |  |
| 49  | G     | 0.03  | [0.0012, 0.2]                                           | 0.31    | 0.27    | 0.2     | 0.13                    | 0.06   | 0.02  | 0.0043 | 0.00029 | 2.2e-06 |  |  |  |  |  |  |  |
| 50  | A     | 0.04  | [0.0012, 0.2]                                           | 0.27    | 0.25    | 0.2     | 0.14                    | 0.083  | 0.039 | 0.013  | 0.0021  | 2.7e-05 |  |  |  |  |  |  |  |
| 51  | L     | 0.38  | [0.12, 0.57]                                            | 1.9e-07 | 0.0001  | 0.0024  | 0.018                   | 0.073  | 0.19  | 0.33   | 0.37    | 0.017   |  |  |  |  |  |  |  |
| 52  | A     | 0.038 | [0.0012, 0.2]                                           | 0.28    | 0.25    | 0.2     | 0.14                    | 0.079  | 0.035 | 0.011  | 0.0017  | 2.1e-05 |  |  |  |  |  |  |  |
| 53  | L     | 0.085 | [0.0012, 0.57]                                          | 0.19    | 0.18    | 0.17    | 0.15                    | 0.12   | 0.093 | 0.061  | 0.028   | 0.00079 |  |  |  |  |  |  |  |
| 54  | H     | 0.11  | [0.0097, 0.32]                                          | 0.011   | 0.083   | 0.19    | 0.26                    | 0.23   | 0.15  | 0.063  | 0.014   | 0.00029 |  |  |  |  |  |  |  |
| 55  | E     | 0.026 | [0.0012, 0.12]                                          | 0.34    | 0.29    | 0.2     | 0.11                    | 0.044  | 0.015 | 0.0044 | 0.0012  | 4.2e-05 |  |  |  |  |  |  |  |
| 56  | K     | 0.025 | [0.0012, 0.12]                                          | 0.34    | 0.29    | 0.2     | 0.11                    | 0.046  | 0.013 | 0.0026 | 0.00028 | 5.4e-06 |  |  |  |  |  |  |  |
| 57  | H     | 0.029 | [0.0012, 0.2]                                           | 0.32    | 0.28    | 0.2     | 0.12                    | 0.057  | 0.02  | 0.005  | 0.00075 | 1.4e-05 |  |  |  |  |  |  |  |
| 58  | K     | 0.18  | [0.03, 0.57]                                            | 0.00016 | 0.0098  | 0.067   | 0.18                    | 0.27   | 0.26  | 0.15   | 0.053   | 0.0017  |  |  |  |  |  |  |  |
| 59  | A     | 0.16  | [0.0097, 0.57]                                          | 0.0064  | 0.049   | 0.13    | 0.2                     | 0.23   | 0.2   | 0.13   | 0.05    | 0.0014  |  |  |  |  |  |  |  |
| 60  | K     | 0.085 | [0.0097, 0.32]                                          | 0.016   | 0.11    | 0.24    | 0.28                    | 0.21   | 0.1   | 0.033  | 0.006   | 0.00015 |  |  |  |  |  |  |  |
| 61  | K     | 0.025 | [0.0012, 0.12]                                          | 0.34    | 0.29    | 0.2     | 0.11                    | 0.046  | 0.014 | 0.0026 | 0.00027 | 4.9e-06 |  |  |  |  |  |  |  |
| 62  | D     | 0.026 | [0.0012, 0.12]                                          | 0.35    | 0.29    | 0.19    | 0.1                     | 0.042  | 0.014 | 0.0048 | 0.0016  | 6.5e-05 |  |  |  |  |  |  |  |
| 63  | P     | 0.2   | [0.0097, 0.57]                                          | 0.0041  | 0.033   | 0.089   | 0.16                    | 0.21   | 0.23  | 0.19   | 0.091   | 0.002   |  |  |  |  |  |  |  |
| 64  | E     | 0.026 | [0.0012, 0.12]                                          | 0.34    | 0.29    | 0.2     | 0.11                    | 0.044  | 0.015 | 0.0044 | 0.0012  | 4.2e-05 |  |  |  |  |  |  |  |
| 65  | H     | 0.33  | [0.064, 0.57]                                           | 6.6e-07 | 0.00033 | 0.0071  | 0.044                   | 0.13   | 0.24  | 0.29   | 0.26    | 0.019   |  |  |  |  |  |  |  |
| 66  | A     | 0.041 | [0.0012, 0.2]                                           | 0.27    | 0.25    | 0.2     | 0.14                    | 0.085  | 0.041 | 0.014  | 0.0023  | 3.2e-05 |  |  |  |  |  |  |  |
| 67  | H     | 0.029 | [0.0012, 0.2]                                           | 0.32    | 0.28    | 0.2     | 0.12                    | 0.056  | 0.019 | 0.0048 | 0.00073 | 1.4e-05 |  |  |  |  |  |  |  |
| 68  | K     | 0.16  | [0.03, 0.57]                                            | 0.0002  | 0.012   | 0.078   | 0.2                     | 0.29   | 0.25  | 0.13   | 0.041   | 0.0011  |  |  |  |  |  |  |  |
| 69  | H     | 0.029 | [0.0012, 0.2]                                           | 0.32    | 0.28    | 0.2     | 0.12                    | 0.056  | 0.019 | 0.0048 | 0.00073 | 1.4e-05 |  |  |  |  |  |  |  |
| 70  | K     | 0.025 | [0.0012, 0.12]                                          | 0.34    | 0.29    | 0.2     | 0.11                    | 0.044  | 0.013 | 0.0024 | 0.00025 | 4.7e-06 |  |  |  |  |  |  |  |
| 71  | I     | 0.18  | [0.0097, 0.57]                                          | 0.0049  | 0.038   | 0.1     | 0.17                    | 0.22   | 0.22  | 0.17   | 0.067   | 0.001   |  |  |  |  |  |  |  |
| 72  | E     | 0.098 | [0.0097, 0.32]                                          | 0.015   | 0.11    | 0.22    | 0.26                    | 0.21   | 0.12  | 0.051  | 0.016   | 0.00056 |  |  |  |  |  |  |  |
| 73  | E     | 0.027 | [0.0012, 0.12]                                          | 0.34    | 0.29    | 0.2     | 0.11                    | 0.046  | 0.016 | 0.0047 | 0.0013  | 4.7e-05 |  |  |  |  |  |  |  |
| 74  | E     | 0.026 | [0.0012, 0.12]                                          | 0.34    | 0.29    | 0.2     | 0.11                    | 0.044  | 0.015 | 0.0044 | 0.0012  | 4.2e-05 |  |  |  |  |  |  |  |
| 75  | I     | 0.16  | [0.0097, 0.57]                                          | 0.0056  | 0.043   | 0.11    | 0.19                    | 0.23   | 0.22  | 0.15   | 0.051   | 0.00067 |  |  |  |  |  |  |  |
| 76  | A     | 0.042 | [0.0012, 0.2]                                           | 0.27    | 0.24    | 0.2     | 0.14                    | 0.087  | 0.042 | 0.015  | 0.0025  | 3.4e-05 |  |  |  |  |  |  |  |
| 77  | A     | 0.044 | [0.0012, 0.2]                                           | 0.26    | 0.24    |         |                         |        |       |        |         |         |  |  |  |  |  |  |  |

|     |   |       |               |         |         |         |       |       |       |        |         |         |
|-----|---|-------|---------------|---------|---------|---------|-------|-------|-------|--------|---------|---------|
| 89  | H | 0.03  | [0.0012,0.2]  | 0.31    | 0.27    | 0.2     | 0.12  | 0.059 | 0.022 | 0.0055 | 0.00084 | 1.6e-05 |
| 90  | E | 0.026 | [0.0012,0.12] | 0.34    | 0.29    | 0.2     | 0.11  | 0.045 | 0.015 | 0.0046 | 0.0013  | 4.6e-05 |
| 91  | H | 0.03  | [0.0012,0.2]  | 0.31    | 0.27    | 0.2     | 0.12  | 0.059 | 0.022 | 0.0056 | 0.00085 | 1.6e-05 |
| 92  | H | 0.03  | [0.0012,0.2]  | 0.31    | 0.28    | 0.2     | 0.12  | 0.058 | 0.021 | 0.0053 | 0.00081 | 1.6e-05 |
| 93  | Q | 0.13  | [0.0097,0.57] | 0.012   | 0.088   | 0.19    | 0.23  | 0.2   | 0.14  | 0.089  | 0.052   | 0.0026  |
| 94  | K | 0.026 | [0.0012,0.12] | 0.33    | 0.29    | 0.2     | 0.11  | 0.048 | 0.015 | 0.0029 | 0.00031 | 5.8e-06 |
| 95  | K | 0.027 | [0.0012,0.12] | 0.33    | 0.28    | 0.2     | 0.11  | 0.05  | 0.016 | 0.0032 | 0.00033 | 5.8e-06 |
| 96  | D | 0.11  | [0.0097,0.57] | 0.015   | 0.11    | 0.22    | 0.26  | 0.2   | 0.12  | 0.059  | 0.026   | 0.0012  |
| 97  | A | 0.14  | [0.0097,0.57] | 0.008   | 0.061   | 0.15    | 0.22  | 0.23  | 0.18  | 0.1    | 0.044   | 0.0022  |
| 98  | K | 0.025 | [0.0012,0.12] | 0.34    | 0.29    | 0.2     | 0.11  | 0.044 | 0.013 | 0.0024 | 0.00025 | 4.8e-06 |
| 99  | K | 0.092 | [0.0097,0.32] | 0.014   | 0.1     | 0.22    | 0.27  | 0.22  | 0.12  | 0.042  | 0.0078  | 0.00019 |
| 100 | E | 0.04  | [0.0012,0.2]  | 0.29    | 0.26    | 0.2     | 0.13  | 0.07  | 0.034 | 0.015  | 0.0062  | 0.00028 |
| 101 | K | 0.43  | [0.12,1]      | 1.1e-07 | 5.8e-05 | 0.0015  | 0.012 | 0.051 | 0.14  | 0.3    | 0.46    | 0.038   |
| 102 | K | 0.18  | [0.0097,0.57] | 0.0053  | 0.041   | 0.11    | 0.18  | 0.22  | 0.21  | 0.15   | 0.084   | 0.0038  |
| 103 | E | 0.04  | [0.0012,0.2]  | 0.29    | 0.26    | 0.2     | 0.13  | 0.07  | 0.033 | 0.015  | 0.0062  | 0.00028 |
| 104 | V | 0.2   | [0.0097,0.57] | 0.0045  | 0.036   | 0.095   | 0.16  | 0.21  | 0.21  | 0.17   | 0.1     | 0.0052  |
| 105 | E | 0.46  | [0.12,1]      | 8e-10   | 3.5e-06 | 0.00025 | 0.004 | 0.027 | 0.11  | 0.29   | 0.53    | 0.045   |
| 106 | G | 0.05  | [0.0012,0.32] | 0.24    | 0.23    | 0.2     | 0.15  | 0.1   | 0.055 | 0.022  | 0.0042  | 4.1e-05 |
| 107 | G | 0.41  | [0.12,1]      | 1.9e-07 | 0.0001  | 0.0024  | 0.017 | 0.066 | 0.17  | 0.3    | 0.41    | 0.033   |
| 108 | H | 0.072 | [0.0012,0.57] | 0.22    | 0.21    | 0.18    | 0.14  | 0.11  | 0.07  | 0.043  | 0.025   | 0.0015  |
| 109 | H | 0.22  | [0.03,0.57]   | 0.00011 | 0.0065  | 0.046   | 0.13  | 0.23  | 0.26  | 0.2    | 0.12    | 0.0056  |
| 110 | H | 0.23  | [0.03,0.57]   | 0.0001  | 0.0063  | 0.045   | 0.13  | 0.22  | 0.25  | 0.21   | 0.13    | 0.0071  |
| 111 | H | 0.23  | [0.03,0.57]   | 0.00011 | 0.0065  | 0.046   | 0.13  | 0.23  | 0.25  | 0.2    | 0.13    | 0.0074  |
| 112 | H | 0.11  | [0.0097,0.32] | 0.012   | 0.086   | 0.2     | 0.26  | 0.23  | 0.14  | 0.063  | 0.018   | 0.0054  |
| 113 | H | 0.32  | [0.064,0.57]  | 1.3e-05 | 0.00096 | 0.0094  | 0.042 | 0.12  | 0.23  | 0.32   | 0.26    | 0.01    |
| 114 | Y | 0.26  | [0.03,0.57]   | 5.2e-05 | 0.0033  | 0.026   | 0.088 | 0.18  | 0.27  | 0.27   | 0.15    | 0.0033  |

Supplementary Table 8:  $K_a/K_s$  values per ASR2 amino acid. First are represented amino acid position, then amino acid,  $w$ -score, confidence interval and Bayesian posterior probabilities.

(c) ASR3

Selecton Bayesian Ka/Ks Results  
Displayed on sequence 1

| POS | AMINO | Ka/Ks | [Confidence Interval]( * if lower bound > 1 ) | POSTERIOR PROBABILITIES |         |         |         |         |        |       |       |       |   |
|-----|-------|-------|-----------------------------------------------|-------------------------|---------|---------|---------|---------|--------|-------|-------|-------|---|
|     |       |       |                                               | w =                     | 0.00017 | 0.0036  | 0.019   | 0.059   | 0.14   | 0.28  | 0.49  | 0.81  | 1 |
| 1   | M     | 0.29  | [0.00017,1]                                   | 0.13                    | 0.13    | 0.13    | 0.12    | 0.11    | 0.09   | 0.066 | 0.043 | 0.17  |   |
| 2   | A     | 0.92  | [0.28,1]                                      | 1.4e-08                 | 6.1e-06 | 0.00017 | 0.0016  | 0.0079  | 0.027  | 0.065 | 0.12  | 0.78  |   |
| 3   | E     | 0.16  | [0.00017,1]                                   | 0.18                    | 0.18    | 0.17    | 0.15    | 0.12    | 0.078  | 0.044 | 0.021 | 0.074 |   |
| 4   | E     | 0.18  | [0.00017,1]                                   | 0.17                    | 0.17    | 0.16    | 0.14    | 0.12    | 0.081  | 0.048 | 0.024 | 0.085 |   |
| 5   | K     | 0.18  | [0.00017,1]                                   | 0.17                    | 0.17    | 0.16    | 0.14    | 0.12    | 0.083  | 0.049 | 0.025 | 0.085 |   |
| 6   | Q     | 0.23  | [0.00017,1]                                   | 0.15                    | 0.15    | 0.15    | 0.14    | 0.11    | 0.087  | 0.058 | 0.033 | 0.12  |   |
| 7   | H     | 0.22  | [0.00017,1]                                   | 0.15                    | 0.15    | 0.15    | 0.14    | 0.12    | 0.087  | 0.057 | 0.032 | 0.12  |   |
| 8   | H     | 0.73  | [0.059,1]                                     | 0.00011                 | 0.0023  | 0.012   | 0.035   | 0.071   | 0.11   | 0.13  | 0.12  | 0.53  |   |
| 9   | R     | 0.75  | [0.059,1]                                     | 0.0001                  | 0.0021  | 0.011   | 0.032   | 0.065   | 0.1    | 0.12  | 0.12  | 0.55  |   |
| 10  | L     | 0.9   | [0.14,1]                                      | 2.2e-05                 | 0.00047 | 0.0025  | 0.0077  | 0.018   | 0.036  | 0.065 | 0.11  | 0.76  |   |
| 11  | F     | 0.42  | [0.00017,1]                                   | 0.1                     | 0.1     | 0.1     | 0.098   | 0.093   | 0.086  | 0.075 | 0.062 | 0.28  |   |
| 12  | H     | 0.71  | [0.059,1]                                     | 0.00013                 | 0.0027  | 0.014   | 0.039   | 0.078   | 0.12   | 0.13  | 0.11  | 0.5   |   |
| 13  | H     | 0.2   | [0.00017,1]                                   | 0.16                    | 0.16    | 0.16    | 0.14    | 0.12    | 0.087  | 0.054 | 0.028 | 0.094 |   |
| 14  | K     | 0.89  | [0.28,1]                                      | 3e-08                   | 1.3e-05 | 0.00036 | 0.0032  | 0.015   | 0.044  | 0.09  | 0.13  | 0.72  |   |
| 15  | N     | 0.64  | [0.059,1]                                     | 0.00019                 | 0.0039  | 0.02    | 0.055   | 0.1     | 0.14   | 0.14  | 0.11  | 0.42  |   |
| 16  | R     | 0.97  | [0.49,1]                                      | 1.2e-15                 | 2.2e-10 | 1.8e-07 | 1.5e-05 | 0.00039 | 0.0045 | 0.028 | 0.1   | 0.87  |   |
| 17  | E     | 0.14  | [0.00017,1]                                   | 0.18                    | 0.18    | 0.17    | 0.15    | 0.12    | 0.077  | 0.041 | 0.017 | 0.054 |   |
| 18  | E     | 0.64  | [0.059,1]                                     | 0.00019                 | 0.0039  | 0.02    | 0.056   | 0.1     | 0.14   | 0.14  | 0.11  | 0.43  |   |
| 19  | E     | 0.6   | [0.019,1]                                     | 0.00022                 | 0.0046  | 0.024   | 0.065   | 0.12    | 0.16   | 0.15  | 0.1   | 0.38  |   |
| 20  | G     | 0.89  | [0.28,1]                                      | 1.3e-05                 | 0.00028 | 0.0016  | 0.0057  | 0.016   | 0.039  | 0.076 | 0.12  | 0.74  |   |
| 21  | G     | 0.93  | [0.28,1]                                      | 1.2e-08                 | 5.2e-06 | 0.00015 | 0.0014  | 0.007   | 0.024  | 0.062 | 0.12  | 0.79  |   |
| 22  | P     | 0.91  | [0.28,1]                                      | 1.7e-08                 | 7.5e-06 | 0.00021 | 0.0019  | 0.0094  | 0.031  | 0.071 | 0.12  | 0.76  |   |
| 23  | V     | 0.76  | [0.059,1]                                     | 9.5e-05                 | 0.002   | 0.01    | 0.03    | 0.062   | 0.097  | 0.12  | 0.12  | 0.56  |   |
| 24  | D     | 0.59  | [0.019,1]                                     | 0.00025                 | 0.0052  | 0.026   | 0.071   | 0.13    | 0.16   | 0.14  | 0.096 | 0.37  |   |
| 25  | H     | 0.73  | [0.059,1]                                     | 0.00011                 | 0.0024  | 0.012   | 0.036   | 0.072   | 0.11   | 0.13  | 0.12  | 0.52  |   |
| 26  | K     | 0.94  | [0.49,1]                                      | 7.1e-12                 | 6.5e-08 | 9.5e-06 | 0.00026 | 0.0028  | 0.016  | 0.054 | 0.12  | 0.81  |   |
| 27  | K     | 0.13  | [0.00017,1]                                   | 0.19                    | 0.19    | 0.18    | 0.16    | 0.12    | 0.076  | 0.039 | 0.015 | 0.044 |   |
| 28  | K     | 0.85  | [0.14,1]                                      | 5.5e-08                 | 2.4e-05 | 0.00065 | 0.0055  | 0.024   | 0.063  | 0.11  | 0.13  | 0.67  |   |
| 29  | V     | 0.95  | [0.49,1]                                      | 4.7e-12                 | 4.3e-08 | 6.3e-06 | 0.00018 | 0.002   | 0.012  | 0.045 | 0.11  | 0.83  |   |
| 30  | K     | 0.15  | [0.00017,1]                                   | 0.18                    | 0.18    | 0.17    | 0.15    | 0.12    | 0.081  | 0.045 | 0.02  | 0.06  |   |
| 31  | H     | 0.19  | [0.00017,1]                                   | 0.16                    | 0.16    | 0.16    | 0.14    | 0.12    | 0.086  | 0.053 | 0.027 | 0.093 |   |
| 32  | H     | 0.18  | [0.00017,1]                                   | 0.17                    | 0.17    | 0.16    | 0.14    | 0.12    | 0.085  | 0.051 | 0.025 | 0.084 |   |
| 33  | S     | 0.89  | [0.28,1]                                      | 2.9e-08                 | 1.2e-05 | 0.00034 | 0.0031  | 0.014   | 0.043  | 0.088 | 0.13  | 0.72  |   |
| 34  | H     | 0.66  | [0.059,1]                                     | 0.00017                 | 0.0034  | 0.018   | 0.05    | 0.096   | 0.13   | 0.14  | 0.11  | 0.45  |   |
| 35  | L     | 0.36  | [0.00017,1]                                   | 0.12                    | 0.12    | 0.11    | 0.11    | 0.1     | 0.089  | 0.072 | 0.053 | 0.23  |   |
| 36  | Q     | 0.88  | [0.28,1]                                      | 3.4e-08                 | 1.5e-05 | 0.0004  | 0.0035  | 0.016   | 0.047  | 0.092 | 0.13  | 0.71  |   |
| 37  | K     | 0.88  | [0.28,1]                                      | 3.3e-08                 | 1.5e-05 | 0.0004  | 0.0035  | 0.016   | 0.048  | 0.095 | 0.13  | 0.71  |   |
| 38  | I     | 0.99  | [0.81,1]                                      | 2.1e-16                 | 4.1e-11 | 3.3e-08 | 3e-06   | 8.6e-05 | 0.0012 | 0.011 | 0.075 | 0.91  |   |
| 39  | G     | 0.67  | [0.059,1]                                     | 0.00016                 | 0.0033  | 0.017   | 0.048   | 0.093   | 0.13   | 0.14  | 0.11  | 0.46  |   |
| 40  | E     | 0.63  | [0.019,1]                                     | 0.00021                 | 0.0043  | 0.022   | 0.06    | 0.11    | 0.15   | 0.14  | 0.1   | 0.41  |   |
| 41  | L     | 0.93  | [0.28,1]                                      | 1.3e-08                 | 5.5e-06 | 0.00015 | 0.0014  | 0.0073  | 0.025  | 0.062 | 0.12  | 0.78  |   |
| 42  | G     | 0.18  | [0.00017,1]                                   | 0.17                    | 0.17    | 0.16    | 0.14    | 0.12    | 0.086  | 0.052 | 0.025 | 0.082 |   |
| 43  | A     | 0.76  | [0.059,1]                                     | 9.5e-05                 | 0.002   | 0.01    | 0.03    | 0.062   | 0.097  | 0.12  | 0.12  | 0.56  |   |
| 44  | V     | 0.95  | [0.49,1]                                      | 4e-12                   | 3.7e-08 | 5.4e-06 | 0.00015 | 0.0018  | 0.011  | 0.043 | 0.11  | 0.83  |   |
| 45  | A     | 0.24  | [0.00017,1]                                   | 0.15                    | 0.15    | 0.14    | 0.13    | 0.11    | 0.089  | 0.061 | 0.035 | 0.13  |   |
| 46  | A     | 0.26  | [0.00017,1]                                   | 0.14                    | 0.14    | 0.14    | 0.13    | 0.11    | 0.09   | 0.064 | 0.039 | 0.15  |   |
| 47  | G     | 0.19  | [0.00017,1]                                   | 0.16                    | 0.16    | 0.16    | 0.14    | 0.12    | 0.087  | 0.053 | 0.026 | 0.088 |   |
| 48  | A     | 0.74  | [0.059,1]                                     | 0.0001                  | 0.0022  | 0.011   | 0.033   | 0.066   | 0.1    | 0.12  | 0.12  | 0.54  |   |
| 49  | Y     | 0.91  | [0.28,1]                                      | 1.7e-08                 | 7.4e-06 | 0.00021 | 0.0019  | 0.0093  | 0.03   | 0.071 | 0.12  | 0.76  |   |
| 50  | A     | 0.79  | [0.059,1]                                     | 7.3e-05                 | 0.0015  | 0.008   | 0.024   | 0.05    | 0.083  | 0.11  | 0.12  | 0.6   |   |
| 51  | L     | 0.94  | [0.28,1]                                      | 8.8e-09                 | 3.9e-06 | 0.00011 | 0.001   | 0.0054  | 0.019  | 0.052 | 0.11  | 0.81  |   |
| 52  | H     | 0.66  | [0.059,1]                                     | 0.00017                 | 0.0034  | 0.018   | 0.05    | 0.096   | 0.13   | 0.14  | 0.11  | 0.45  |   |
| 53  | E     | 0.14  | [0.00017,1]                                   | 0.18                    | 0.18    | 0.17    | 0.15    | 0.12    | 0.078  | 0.042 | 0.018 | 0.054 |   |
| 54  | K     | 0.15  | [0.00017,1]                                   | 0.18                    | 0.18    | 0.17    | 0.15    | 0.12    | 0.081  | 0.045 | 0.02  | 0.06  |   |
| 55  | H     | 0.2   | [0.00017,1]                                   | 0.16                    | 0.16    | 0.16    | 0.14    | 0.12    | 0.087  | 0.054 | 0.028 | 0.094 |   |
| 56  | K     | 0.15  | [0.00017,1]                                   | 0.18                    | 0.18    | 0.17    | 0.15    | 0.12    | 0.081  | 0.045 | 0.02  | 0.06  |   |
| 57  | A     | 0.77  | [0.059,1]                                     | 8.5e-05                 | 0.0018  | 0.0093  | 0.027   | 0.056   | 0.09   | 0.12  | 0.12  | 0.58  |   |
| 58  | K     | 0.15  | [0.00017,1]                                   | 0.18                    | 0.18    | 0.17    | 0.15    | 0.12    | 0.081  | 0.045 | 0.02  | 0.06  |   |
| 59  | K     | 0.13  | [0.00017,1]                                   | 0.19                    | 0.19    | 0.18    | 0.16    | 0.12    | 0.076  | 0.039 | 0.015 | 0.044 |   |
| 60  | D     | 0.14  | [0.00017,1]                                   | 0.18                    | 0.18    | 0.17    | 0.15    | 0.12    | 0.077  | 0.041 | 0.017 | 0.053 |   |
| 61  | P     | 0.32  | [0.00017,1]                                   | 0.13                    | 0.13    | 0.12    | 0.12    | 0.11    | 0.09   | 0.069 | 0.047 | 0.19  |   |
| 62  | E     | 0.14  | [0.00017,1]                                   | 0.18                    | 0.18    | 0.17    | 0.15    | 0.12    | 0.078  | 0.042 | 0.018 | 0.054 |   |
| 63  | N     | 0.65  | [0.059,1]                                     | 0.00018                 | 0.0037  | 0.019   | 0.053   | 0.1     | 0.14   | 0.14  | 0.11  | 0.43  |   |
| 64  | A     | 0.76  | [0.059,1]                                     | 9.2e-05                 | 0.0019  | 0.0099  | 0.029   | 0.06    | 0.095  | 0.12  | 0.12  | 0.57  |   |
| 65  | H     | 0.69  | [0.059,1]                                     | 0.00014                 | 0.0029  | 0.015   | 0.042   | 0.084   | 0.12   | 0.14  | 0.11  | 0.48  |   |
| 66  | K     | 0.86  | [0.14,1]                                      | 4.5e-08                 | 1.9e-05 | 0.00053 | 0.0046  | 0.021   | 0.057  | 0.11  | 0.13  | 0.68  |   |
| 67  | H     | 0.2   | [0.00017,1]                                   | 0.16                    | 0.16    | 0.16    | 0.14    | 0.12    | 0.087  | 0.054 | 0.028 | 0.094 |   |
| 68  | K     | 0.15  | [0.00017,1]                                   | 0.18                    | 0.18    | 0.17    | 0.15    | 0.12    | 0.081  | 0.045 | 0.02  | 0.06  |   |
| 69  | I     | 0.26  | [0.00017,1]                                   | 0.14                    | 0.14    | 0.14    | 0.13    | 0.11    | 0.09   | 0.063 | 0.038 | 0.14  |   |
| 70  | K     | 0.84  | [0.14,1]                                      | 5.9e-08                 | 2.6e-05 | 0.00069 | 0.0059  | 0.026   | 0.068  | 0.12  | 0.13  | 0.65  |   |
| 71  | Q     | 0.65  | [0.059,1]                                     | 0.00019                 | 0.004   | 0.02    | 0.056   | 0.1     | 0.14   | 0.14  | 0.1   | 0.44  |   |
| 72  | E     | 0.14  | [0.00017,1]                                   | 0.18                    | 0.18    | 0.17    | 0.15    | 0.12    | 0.078  | 0.042 | 0.018 | 0.054 |   |
| 73  | I     | 0.27  | [0.00017,1]                                   | 0.14                    | 0.14    | 0.14    | 0.13    | 0.11    | 0.09   | 0.064 | 0.039 | 0.15  |   |
| 74  | A     | 0.25  | [0.00017,1]                                   | 0.15                    | 0.14    | 0.14    | 0.13    | 0.11    | 0.09   | 0.062 | 0.036 | 0.14  |   |
| 75  | A     | 0.25  | [0.00017,1]                                   | 0.15                    | 0.15    | 0.14    | 0.13    | 0.11    | 0.09   | 0.062 | 0.036 | 0.13  |   |
| 76  | V     | 0.75  | [0.059,1]                                     | 9.7e-05                 | 0.002   | 0.01    | 0.03    | 0.063   | 0.098  | 0.12  | 0.12  | 0.56  |   |
| 77  | A     | 0.23  | [0.00017,1]                                   | 0.15                    | 0.15    | 0.15    | 0.13    | 0.12    | 0.089  | 0.06  | 0.034 | 0.12  |   |
| 78  | A     | 0.24  | [0.00017,1]                                   | 0.15                    | 0.15    | 0.14    | 0.13    | 0.11    | 0.089  | 0.061 | 0.035 | 0.13  |   |
| 79  | V     | 0.23  | [0.00017,1]                                   | 0.15                    | 0.15    | 0.15    | 0.14    | 0.12    | 0.089  | 0.06  | 0.033 | 0.12  |   |
| 80  | G     | 0.19  | [0.00017,1]                                   | 0.17                    | 0.16    | 0.16    | 0.14    | 0.12    | 0.086  | 0.052 | 0.026 | 0.086 |   |
| 81  | A     | 0.78  | [0.059,1]                                     | 8.2e-05                 | 0.0017  | 0.0089  | 0.026   | 0.055   | 0.089  | 0.11  | 0.12  | 0.59  |   |
| 82  | G     | 0.7   | [0.059,1]                                     | 0.00013                 | 0.0027  | 0.014   | 0.04    | 0.08    | 0.12   | 0.13  | 0.11  | 0.5   |   |
| 83  | G     | 0.19  | [0.00017,1]                                   | 0.16                    | 0.16    | 0.16    | 0.14    | 0.12    | 0.087  | 0.053 | 0.026 | 0.087 |   |
| 84  | F     | 0.84  | [0.14,1]                                      | 4.9e-05                 | 0.001   | 0.0054  | 0.016   | 0.036   | 0.064  | 0.095 | 0.12  | 0.66  |   |
| 85  | A     | 0.76  | [0.059,1]                                     | 9.1e-05                 | 0.0019  | 0.0099  | 0.029   | 0.06    | 0.095  | 0.12  | 0.12  | 0.57  |   |
| 86  | F     | 0.4   | [0.00017,1]                                   | 0.1                     | 0.1     | 0.1     | 0.1     | 0.095   | 0.086  | 0.074 | 0.06  | 0.27  |   |
| 87  | H     | 0.16  | [0.00017,1]                                   | 0.18                    | 0.17    | 0.17    | 0.15    | 0.12    | 0.083  | 0.047 | 0.021 | 0.066 |   |
| 88  | E     | 0.14  | [0.00017,1]                                   | 0.19                    | 0.18    | 0.17    | 0.15    | 0.12    | 0.076  | 0.04  | 0.017 | 0.052 |   |

|     |   |      |             |         |         |         |         |        |       |       |       |       |
|-----|---|------|-------------|---------|---------|---------|---------|--------|-------|-------|-------|-------|
| 89  | H | 0.16 | [0.00017,1] | 0.17    | 0.17    | 0.16    | 0.15    | 0.12   | 0.083 | 0.048 | 0.022 | 0.071 |
| 90  | H | 0.16 | [0.00017,1] | 0.18    | 0.17    | 0.17    | 0.15    | 0.12   | 0.083 | 0.047 | 0.021 | 0.066 |
| 91  | Q | 0.95 | [0.49,1]    | 5.3e-12 | 4.8e-08 | 7.1e-06 | 0.0002  | 0.0022 | 0.013 | 0.047 | 0.11  | 0.82  |
| 92  | K | 0.15 | [0.00017,1] | 0.18    | 0.18    | 0.17    | 0.15    | 0.12   | 0.081 | 0.045 | 0.02  | 0.06  |
| 93  | K | 0.13 | [0.00017,1] | 0.19    | 0.18    | 0.18    | 0.15    | 0.12   | 0.077 | 0.04  | 0.016 | 0.047 |
| 94  | E | 0.87 | [0.28,1]    | 4e-08   | 1.7e-05 | 0.00047 | 0.0041  | 0.019  | 0.052 | 0.098 | 0.13  | 0.7   |
| 95  | A | 0.8  | [0.059,1]   | 6.8e-05 | 0.0014  | 0.0074  | 0.022   | 0.047  | 0.079 | 0.11  | 0.12  | 0.62  |
| 96  | K | 0.15 | [0.00017,1] | 0.18    | 0.18    | 0.17    | 0.15    | 0.12   | 0.081 | 0.045 | 0.02  | 0.06  |
| 97  | K | 0.13 | [0.00017,1] | 0.19    | 0.19    | 0.18    | 0.16    | 0.12   | 0.076 | 0.039 | 0.015 | 0.044 |
| 98  | E | 0.14 | [0.00017,1] | 0.18    | 0.18    | 0.17    | 0.15    | 0.12   | 0.077 | 0.041 | 0.017 | 0.054 |
| 99  | K | 0.86 | [0.14,1]    | 5.1e-08 | 2.2e-05 | 0.0006  | 0.0052  | 0.023  | 0.061 | 0.11  | 0.13  | 0.67  |
| 100 | K | 0.65 | [0.059,1]   | 0.00018 | 0.0038  | 0.019   | 0.054   | 0.1    | 0.14  | 0.14  | 0.11  | 0.44  |
| 101 | A | 0.68 | [0.059,1]   | 0.00017 | 0.0034  | 0.018   | 0.049   | 0.093  | 0.13  | 0.13  | 0.11  | 0.47  |
| 102 | A | 0.23 | [0.00017,1] | 0.15    | 0.15    | 0.15    | 0.13    | 0.12   | 0.089 | 0.06  | 0.034 | 0.12  |
| 103 | E | 0.93 | [0.49,1]    | 9.4e-12 | 8.6e-08 | 1.2e-05 | 0.00034 | 0.0036 | 0.019 | 0.062 | 0.13  | 0.79  |
| 104 | K | 0.94 | [0.49,1]    | 6.4e-12 | 5.8e-08 | 8.5e-06 | 0.00024 | 0.0026 | 0.015 | 0.053 | 0.12  | 0.81  |
| 105 | G | 0.88 | [0.28,1]    | 3.5e-08 | 1.5e-05 | 0.00042 | 0.0037  | 0.017  | 0.049 | 0.096 | 0.13  | 0.7   |
| 106 | R | 0.83 | [0.14,1]    | 3.7e-05 | 0.00078 | 0.0043  | 0.014   | 0.035  | 0.068 | 0.1   | 0.12  | 0.65  |
| 107 | H | 0.7  | [0.059,1]   | 0.00013 | 0.0028  | 0.014   | 0.041   | 0.081  | 0.12  | 0.13  | 0.11  | 0.49  |
| 108 | H | 0.2  | [0.00017,1] | 0.16    | 0.16    | 0.16    | 0.14    | 0.12   | 0.087 | 0.054 | 0.028 | 0.094 |

Supplementary Table 9: Ka/Ks values per ASR3 amino acid. First are represented amino acid position, then amino acid, w-score, confidence interval and Bayesian posterior probabilities.







|     |   |       |                |         |         |         |         |         |         |        |       |       |
|-----|---|-------|----------------|---------|---------|---------|---------|---------|---------|--------|-------|-------|
| 183 | G | 0.39  | [6.9e-05,1]    | 0.086   | 0.086   | 0.086   | 0.086   | 0.086   | 0.085   | 0.084  | 0.082 | 0.32  |
| 184 | G | 0.4   | [6.9e-05,1]    | 0.085   | 0.085   | 0.085   | 0.085   | 0.085   | 0.085   | 0.084  | 0.082 | 0.33  |
| 185 | G | 0.4   | [6.9e-05,1]    | 0.085   | 0.085   | 0.085   | 0.085   | 0.085   | 0.085   | 0.084  | 0.082 | 0.33  |
| 186 | V | 0.4   | [6.9e-05,1]    | 0.085   | 0.085   | 0.085   | 0.085   | 0.085   | 0.085   | 0.085  | 0.084 | 0.32  |
| 187 | G | 0.39  | [6.9e-05,1]    | 0.086   | 0.086   | 0.086   | 0.086   | 0.086   | 0.085   | 0.084  | 0.082 | 0.32  |
| 188 | A | 0.41  | [6.9e-05,1]    | 0.084   | 0.084   | 0.084   | 0.084   | 0.084   | 0.084   | 0.083  | 0.082 | 0.33  |
| 189 | Y | 0.41  | [6.9e-05,1]    | 0.084   | 0.084   | 0.084   | 0.084   | 0.084   | 0.084   | 0.083  | 0.082 | 0.33  |
| 190 | S | 0.41  | [6.9e-05,1]    | 0.083   | 0.083   | 0.083   | 0.083   | 0.083   | 0.083   | 0.083  | 0.082 | 0.34  |
| 191 | S | 0.41  | [6.9e-05,1]    | 0.084   | 0.084   | 0.084   | 0.084   | 0.084   | 0.084   | 0.084  | 0.083 | 0.33  |
| 192 | E | 0.39  | [6.9e-05,1]    | 0.086   | 0.086   | 0.086   | 0.086   | 0.086   | 0.086   | 0.085  | 0.084 | 0.32  |
| 193 | T | 0.4   | [6.9e-05,1]    | 0.085   | 0.085   | 0.085   | 0.085   | 0.085   | 0.084   | 0.084  | 0.082 | 0.33  |
| 194 | T | 0.9   | [0.21,1]       | 6.4e-09 | 2.4e-06 | 6.4e-05 | 0.00059 | 0.0031  | 0.012   | 0.038  | 0.11  | 0.84  |
| 195 | T | 0.9   | [0.21,1]       | 6.4e-09 | 2.4e-06 | 6.4e-05 | 0.00059 | 0.0031  | 0.012   | 0.038  | 0.11  | 0.84  |
| 196 | N | 0.99  | [0.47,1]       | 2.5e-17 | 3.7e-12 | 2.5e-09 | 2.2e-07 | 6.8e-06 | 0.00012 | 0.0015 | 0.024 | 0.97  |
| 197 | Y | 0.67  | [0.021,1]      | 6.7e-05 | 0.0013  | 0.0067  | 0.02    | 0.044   | 0.081   | 0.13   | 0.17  | 0.55  |
| 198 | E | 0.83  | [0.11,1]       | 1.7e-08 | 6.4e-06 | 0.00017 | 0.0015  | 0.0076  | 0.027   | 0.073  | 0.16  | 0.73  |
| 199 | E | 0.95  | [0.47,1]       | 1e-12   | 7.7e-09 | 1e-06   | 2.8e-05 | 0.00035 | 0.0026  | 0.015  | 0.077 | 0.91  |
| 200 | N | 0.58  | [0.021,1]      | 0.00011 | 0.0021  | 0.01    | 0.031   | 0.066   | 0.11    | 0.16   | 0.17  | 0.44  |
| 201 | D | 0.93  | [0.21,1]       | 1.6e-09 | 6.2e-07 | 1.7e-05 | 0.00018 | 0.0011  | 0.0056  | 0.023  | 0.092 | 0.88  |
| 202 | D | 0.7   | [0.021,1]      | 7.4e-05 | 0.0014  | 0.0073  | 0.021   | 0.045   | 0.078   | 0.11   | 0.14  | 0.59  |
| 203 | S | 0.9   | [0.21,1]       | 1.5e-09 | 6e-07   | 1.8e-05 | 0.00021 | 0.0016  | 0.0087  | 0.037  | 0.13  | 0.82  |
| 204 | G | 0.61  | [0.021,1]      | 0.00012 | 0.0023  | 0.011   | 0.033   | 0.067   | 0.11    | 0.14   | 0.14  | 0.5   |
| 205 | T | 0.76  | [0.051,1]      | 4e-05   | 0.00079 | 0.004   | 0.012   | 0.028   | 0.054   | 0.093  | 0.15  | 0.66  |
| 206 | K | 0.95  | [0.47,1]       | 1.7e-09 | 6.6e-07 | 1.8e-05 | 0.00017 | 0.00099 | 0.0045  | 0.018  | 0.079 | 0.9   |
| 207 | T | 0.74  | [0.051,1]      | 4.7e-05 | 0.00091 | 0.0047  | 0.014   | 0.032   | 0.061   | 0.1    | 0.15  | 0.63  |
| 208 | S | 0.95  | [0.47,1]       | 1.2e-09 | 4.6e-07 | 1.3e-05 | 0.00013 | 0.00081 | 0.004   | 0.017  | 0.079 | 0.9   |
| 209 | E | 0.75  | [0.051,1]      | 2.4e-05 | 0.00047 | 0.0025  | 0.0084  | 0.022   | 0.052   | 0.1    | 0.17  | 0.64  |
| 210 | D | 0.091 | [6.9e-05,1]    | 0.17    | 0.17    | 0.16    | 0.15    | 0.13    | 0.095   | 0.06   | 0.027 | 0.045 |
| 211 | Y | 0.92  | [0.21,1]       | 4.3e-09 | 1.7e-06 | 4.4e-05 | 0.0004  | 0.0022  | 0.0087  | 0.029  | 0.095 | 0.86  |
| 212 | K | 0.089 | [6.9e-05,1]    | 0.16    | 0.16    | 0.16    | 0.15    | 0.13    | 0.1     | 0.07   | 0.03  | 0.038 |
| 213 | E | 0.51  | [0.021,1]      | 0.00015 | 0.0029  | 0.014   | 0.041   | 0.086   | 0.14    | 0.18   | 0.16  | 0.37  |
| 214 | E | 0.099 | [6.9e-05,1]    | 0.16    | 0.16    | 0.16    | 0.15    | 0.13    | 0.099   | 0.065  | 0.03  | 0.049 |
| 215 | K | 0.52  | [0.021,1]      | 0.00014 | 0.0027  | 0.014   | 0.039   | 0.082   | 0.13    | 0.18   | 0.16  | 0.39  |
| 216 | K | 0.089 | [6.9e-05,1]    | 0.16    | 0.16    | 0.16    | 0.15    | 0.13    | 0.1     | 0.069  | 0.03  | 0.039 |
| 217 | H | 0.12  | [6.9e-05,1]    | 0.15    | 0.15    | 0.15    | 0.14    | 0.13    | 0.11    | 0.083  | 0.043 | 0.055 |
| 218 | H | 0.13  | [6.9e-05,1]    | 0.14    | 0.14    | 0.14    | 0.14    | 0.13    | 0.11    | 0.086  | 0.048 | 0.065 |
| 219 | K | 0.089 | [6.9e-05,1]    | 0.16    | 0.16    | 0.16    | 0.15    | 0.13    | 0.1     | 0.07   | 0.03  | 0.038 |
| 220 | H | 0.091 | [6.9e-05,1]    | 0.16    | 0.16    | 0.15    | 0.15    | 0.13    | 0.11    | 0.075  | 0.033 | 0.037 |
| 221 | L | 0.96  | [0.47,1]       | 2.3e-10 | 9.1e-08 | 2.8e-06 | 3.5e-05 | 0.00029 | 0.0018  | 0.01   | 0.062 | 0.93  |
| 222 | E | 0.095 | [6.9e-05,1]    | 0.16    | 0.16    | 0.16    | 0.15    | 0.13    | 0.098   | 0.064  | 0.029 | 0.047 |
| 223 | E | 0.83  | [0.11,1]       | 1.7e-08 | 6.4e-06 | 0.00017 | 0.0015  | 0.0076  | 0.027   | 0.073  | 0.16  | 0.73  |
| 224 | L | 0.78  | [0.051,1]      | 3.7e-05 | 0.00073 | 0.0037  | 0.011   | 0.026   | 0.05    | 0.087  | 0.14  | 0.68  |
| 225 | G | 0.11  | [6.9e-05,1]    | 0.15    | 0.15    | 0.15    | 0.14    | 0.13    | 0.11    | 0.075  | 0.036 | 0.054 |
| 226 | G | 0.59  | [0.021,1]      | 0.00011 | 0.0021  | 0.01    | 0.03    | 0.065   | 0.11    | 0.16   | 0.17  | 0.46  |
| 227 | L | 0.25  | [6.9e-05,1]    | 0.11    | 0.11    | 0.11    | 0.11    | 0.11    | 0.1     | 0.092  | 0.071 | 0.18  |
| 228 | G | 0.1   | [6.9e-05,1]    | 0.16    | 0.16    | 0.15    | 0.14    | 0.13    | 0.11    | 0.073  | 0.034 | 0.05  |
| 229 | A | 0.12  | [6.9e-05,1]    | 0.15    | 0.15    | 0.14    | 0.14    | 0.13    | 0.11    | 0.082  | 0.044 | 0.063 |
| 230 | V | 0.64  | [0.021,1]      | 7.9e-05 | 0.0015  | 0.0078  | 0.023   | 0.051   | 0.092   | 0.14   | 0.17  | 0.51  |
| 231 | A | 0.1   | [6.9e-05,1]    | 0.16    | 0.15    | 0.15    | 0.14    | 0.13    | 0.11    | 0.076  | 0.036 | 0.048 |
| 232 | A | 0.12  | [6.9e-05,1]    | 0.15    | 0.15    | 0.14    | 0.14    | 0.13    | 0.11    | 0.082  | 0.044 | 0.063 |
| 233 | G | 0.076 | [6.9e-05,1]    | 0.17    | 0.17    | 0.16    | 0.15    | 0.13    | 0.1     | 0.066  | 0.026 | 0.028 |
| 234 | A | 0.14  | [6.9e-05,1]    | 0.14    | 0.14    | 0.14    | 0.13    | 0.12    | 0.11    | 0.084  | 0.048 | 0.082 |
| 235 | F | 0.67  | [0.021,1]      | 6.8e-05 | 0.0013  | 0.0068  | 0.02    | 0.045   | 0.082   | 0.13   | 0.16  | 0.55  |
| 236 | A | 0.12  | [6.9e-05,1]    | 0.15    | 0.15    | 0.14    | 0.14    | 0.13    | 0.11    | 0.082  | 0.044 | 0.063 |
| 237 | L | 0.29  | [6.9e-05,1]    | 0.11    | 0.1     | 0.1     | 0.1     | 0.1     | 0.097   | 0.09   | 0.075 | 0.22  |
| 238 | H | 0.091 | [6.9e-05,1]    | 0.16    | 0.16    | 0.15    | 0.15    | 0.13    | 0.11    | 0.075  | 0.033 | 0.037 |
| 239 | E | 0.099 | [6.9e-05,1]    | 0.16    | 0.16    | 0.16    | 0.15    | 0.13    | 0.099   | 0.065  | 0.03  | 0.049 |
| 240 | K | 0.089 | [6.9e-05,1]    | 0.16    | 0.16    | 0.16    | 0.15    | 0.13    | 0.1     | 0.07   | 0.03  | 0.038 |
| 241 | H | 0.13  | [6.9e-05,1]    | 0.14    | 0.14    | 0.14    | 0.14    | 0.13    | 0.11    | 0.086  | 0.048 | 0.065 |
| 242 | K | 0.6   | [0.021,1]      | 9.1e-05 | 0.0018  | 0.009   | 0.027   | 0.058   | 0.1     | 0.15   | 0.18  | 0.47  |
| 243 | A | 0.14  | [6.9e-05,1]    | 0.14    | 0.14    | 0.14    | 0.13    | 0.12    | 0.11    | 0.086  | 0.049 | 0.079 |
| 244 | E | 0.51  | [0.021,1]      | 0.00014 | 0.0028  | 0.014   | 0.041   | 0.085   | 0.14    | 0.18   | 0.16  | 0.38  |
| 245 | K | 0.089 | [6.9e-05,1]    | 0.16    | 0.16    | 0.16    | 0.15    | 0.13    | 0.1     | 0.069  | 0.03  | 0.039 |
| 246 | D | 0.097 | [6.9e-05,1]    | 0.17    | 0.17    | 0.16    | 0.15    | 0.13    | 0.094   | 0.059  | 0.028 | 0.051 |
| 247 | P | 0.21  | [6.9e-05,1]    | 0.12    | 0.12    | 0.12    | 0.12    | 0.11    | 0.11    | 0.092  | 0.067 | 0.14  |
| 248 | E | 0.099 | [6.9e-05,1]    | 0.16    | 0.16    | 0.16    | 0.15    | 0.13    | 0.099   | 0.065  | 0.03  | 0.049 |
| 249 | H | 0.67  | [0.021,1]      | 8.8e-05 | 0.0017  | 0.0086  | 0.025   | 0.052   | 0.087   | 0.12   | 0.14  | 0.57  |
| 250 | A | 0.14  | [6.9e-05,1]    | 0.14    | 0.14    | 0.14    | 0.13    | 0.12    | 0.11    | 0.085  | 0.048 | 0.075 |
| 251 | H | 0.13  | [6.9e-05,1]    | 0.14    | 0.14    | 0.14    | 0.14    | 0.13    | 0.11    | 0.086  | 0.048 | 0.065 |
| 252 | K | 0.089 | [6.9e-05,1]    | 0.16    | 0.16    | 0.16    | 0.15    | 0.13    | 0.1     | 0.07   | 0.03  | 0.038 |
| 253 | H | 0.13  | [6.9e-05,1]    | 0.14    | 0.14    | 0.14    | 0.14    | 0.13    | 0.11    | 0.086  | 0.048 | 0.065 |
| 254 | K | 0.089 | [6.9e-05,1]    | 0.16    | 0.16    | 0.16    | 0.15    | 0.13    | 0.1     | 0.07   | 0.03  | 0.038 |
| 255 | I | 0.7   | [0.021,1]      | 6.2e-05 | 0.0012  | 0.0062  | 0.018   | 0.041   | 0.075   | 0.12   | 0.15  | 0.59  |
| 256 | E | 0.74  | [0.051,1]      | 4e-05   | 0.00079 | 0.0041  | 0.013   | 0.03    | 0.06    | 0.11   | 0.16  | 0.63  |
| 257 | E | 0.68  | [0.021,1]      | 7.3e-05 | 0.0014  | 0.0072  | 0.021   | 0.046   | 0.082   | 0.12   | 0.15  | 0.57  |
| 258 | E | 0.71  | [0.021,1]      | 7.2e-05 | 0.0014  | 0.0071  | 0.021   | 0.044   | 0.075   | 0.11   | 0.14  | 0.61  |
| 259 | I | 0.18  | [6.9e-05,1]    | 0.13    | 0.13    | 0.13    | 0.13    | 0.12    | 0.11    | 0.09   | 0.059 | 0.11  |
| 260 | A | 0.13  | [6.9e-05,1]    | 0.15    | 0.15    | 0.14    | 0.14    | 0.13    | 0.11    | 0.081  | 0.043 | 0.068 |
| 261 | A | 0.15  | [6.9e-05,1]    | 0.14    | 0.14    | 0.14    | 0.13    | 0.12    | 0.11    | 0.086  | 0.051 | 0.085 |
| 262 | V | 0.9   | [0.21,1]       | 7.1e-09 | 2.7e-06 | 7.1e-05 | 0.00065 | 0.0034  | 0.013   | 0.039  | 0.11  | 0.83  |
| 263 | A | 0.56  | [0.021,1]      | 0.00011 | 0.0021  | 0.011   | 0.032   | 0.069   | 0.12    | 0.17   | 0.18  | 0.42  |
| 264 | A | 0.14  | [6.9e-05,1]    | 0.14    | 0.14    | 0.14    | 0.13    | 0.12    | 0.11    | 0.086  | 0.049 | 0.079 |
| 265 | V | 0.68  | [0.021,1]      | 7.2e-05 | 0.0014  | 0.0071  | 0.021   | 0.046   | 0.083   | 0.13   | 0.15  | 0.56  |
| 266 | G | 0.096 | [6.9e-05,1]    | 0.16    | 0.16    | 0.15    | 0.15    | 0.13    | 0.11    | 0.075  | 0.034 | 0.042 |
| 267 | A | 0.9   | [0.21,1]       | 5.4e-09 | 2.1e-06 | 5.5e-05 | 0.00051 | 0.0028  | 0.011   | 0.037  | 0.11  | 0.83  |
| 268 | G | 0.59  | [0.021,1]      | 9.5e-05 | 0.0019  | 0.0094  | 0.028   | 0.061   | 0.11    | 0.16   | 0.18  | 0.46  |
| 269 | G | 0.12  | [6.9e-05,1]    | 0.15    | 0.15    | 0.15    | 0.14    | 0.13    | 0.11    | 0.08   | 0.041 | 0.057 |
| 270 | F | 0.18  | [6.9e-05,1]    | 0.13    | 0.13    | 0.13    | 0.12    | 0.12    | 0.11    | 0.092  | 0.061 | 0.11  |
| 271 | A | 0.14  | [6.9e-05,1]    | 0.14    | 0.14    | 0.14    | 0.13    | 0.12    | 0.11    | 0.085  | 0.048 | 0.075 |
| 272 | F | 0.27  | [6.9e-05,1]    | 0.11    | 0.11    | 0.11    | 0.11    | 0.1     | 0.099   | 0.091  | 0.075 | 0.2   |
| 273 | H | 0.091 | [6.9e-05,1]    | 0.16    | 0.16    | 0.15    | 0.15    | 0.13    | 0.11    | 0.075  | 0.033 | 0.037 |
| 274 | E | 0.1   | [6.9e-05,1]    | 0.16    | 0.16    | 0.16    | 0.15    | 0.13    | 0.099   | 0.065  | 0.03  | 0.051 |
| 275 | H | 0.091 | [6.9e-05,1]    | 0.16    | 0.16    | 0.15    | 0.15    | 0.13    | 0.11    | 0.075  | 0.033 | 0.037 |
| 276 | H | 0.071 | [6.9e-05,0.47] | 0.17    | 0.17    | 0.16    | 0.15    | 0.13    | 0.1     | 0.066  | 0.025 | 0.023 |

|     |   |       |             |         |         |         |         |         |         |        |       |       |
|-----|---|-------|-------------|---------|---------|---------|---------|---------|---------|--------|-------|-------|
| 277 | Q | 0.93  | [0.21,1]    | 4.5e-09 | 1.7e-06 | 4.5e-05 | 0.00041 | 0.0022  | 0.0081  | 0.025  | 0.081 | 0.88  |
| 278 | K | 0.089 | [6.9e-05,1] | 0.16    | 0.16    | 0.16    | 0.15    | 0.13    | 0.1     | 0.07   | 0.03  | 0.038 |
| 279 | K | 0.089 | [6.9e-05,1] | 0.16    | 0.16    | 0.16    | 0.15    | 0.13    | 0.1     | 0.069  | 0.03  | 0.039 |
| 280 | E | 0.095 | [6.9e-05,1] | 0.16    | 0.16    | 0.16    | 0.15    | 0.13    | 0.098   | 0.064  | 0.029 | 0.047 |
| 281 | A | 0.14  | [6.9e-05,1] | 0.14    | 0.14    | 0.14    | 0.13    | 0.12    | 0.11    | 0.086  | 0.049 | 0.079 |
| 282 | K | 0.7   | [0.021,1]   | 7e-05   | 0.0014  | 0.0069  | 0.02    | 0.044   | 0.077   | 0.11   | 0.14  | 0.59  |
| 283 | E | 0.52  | [0.021,1]   | 0.00014 | 0.0028  | 0.014   | 0.04    | 0.083   | 0.14    | 0.18   | 0.16  | 0.39  |
| 284 | E | 0.95  | [0.47,1]    | 1e-12   | 7.8e-09 | 1e-06   | 2.9e-05 | 0.00036 | 0.0027  | 0.015  | 0.081 | 0.9   |
| 285 | E | 0.98  | [0.47,1]    | 1.6e-13 | 1.2e-09 | 1.6e-07 | 4.8e-06 | 6.4e-05 | 0.00057 | 0.0041 | 0.038 | 0.96  |
| 286 | E | 0.98  | [0.47,1]    | 5.2e-14 | 4e-10   | 5.8e-08 | 1.9e-06 | 3.1e-05 | 0.00035 | 0.0032 | 0.036 | 0.96  |
| 287 | E | 0.7   | [0.021,1]   | 6.6e-05 | 0.0013  | 0.0065  | 0.019   | 0.042   | 0.076   | 0.11   | 0.15  | 0.59  |
| 288 | A | 0.3   | [6.9e-05,1] | 0.1     | 0.1     | 0.1     | 0.1     | 0.099   | 0.096   | 0.09   | 0.077 | 0.23  |
| 289 | E | 0.93  | [0.21,1]    | 4.9e-06 | 9.6e-05 | 0.00051 | 0.0017  | 0.0044  | 0.011   | 0.027  | 0.08  | 0.88  |
| 290 | G | 0.84  | [0.051,1]   | 2.4e-05 | 0.00047 | 0.0024  | 0.0073  | 0.017   | 0.034   | 0.063  | 0.12  | 0.76  |
| 291 | K | 0.83  | [0.051,1]   | 2.5e-05 | 0.0005  | 0.0026  | 0.0078  | 0.018   | 0.036   | 0.066  | 0.12  | 0.75  |
| 292 | K | 0.29  | [6.9e-05,1] | 0.1     | 0.1     | 0.1     | 0.1     | 0.1     | 0.097   | 0.09   | 0.076 | 0.22  |
| 293 | K | 0.3   | [6.9e-05,1] | 0.1     | 0.1     | 0.1     | 0.1     | 0.1     | 0.096   | 0.089  | 0.075 | 0.22  |
| 294 | H | 0.28  | [6.9e-05,1] | 0.11    | 0.11    | 0.11    | 0.11    | 0.1     | 0.099   | 0.091  | 0.075 | 0.2   |
| 295 | H | 0.31  | [6.9e-05,1] | 0.1     | 0.1     | 0.1     | 0.1     | 0.099   | 0.095   | 0.089  | 0.077 | 0.23  |
| 296 | F | 0.38  | [6.9e-05,1] | 0.089   | 0.089   | 0.089   | 0.089   | 0.088   | 0.087   | 0.085  | 0.081 | 0.3   |
| 297 | F | 0.39  | [6.9e-05,1] | 0.087   | 0.087   | 0.087   | 0.087   | 0.087   | 0.086   | 0.085  | 0.082 | 0.31  |

Supplementary Table 10: Ka/Ks values per ASR4 amino acid. First are represented amino acid position, then amino acid, w-score, confidence interval and Bayesian posterior probabilities.
